# Supplementary material for: Measurement properties of the Mental Health Literacy Scale (MHLS) validation studies: a systematic review protocol
Source: PubMed Central journal article supplement — BMJ Open. 2024 Apr 2;14(4):e081394. doi: 10.1136/bmjopen-2023-081394 (PMC10989124; doi:10.1136/bmjopen-2023-081394), 2024-04-02
Supplement: bmjopen-2023-081394.draft_revisions.pdf [file bmjopen-2023-081394.draft_revisions.pdf]

# BMJ Open

BMJ Open is committed to open peer review. As part of this commitment we make the peer review history of every article we publish publicly available.

When an article is published we post the peer reviewers' comments and the authors' responses online. We also post the versions of the paper that were used during peer review. These are the versions that the peer review comments apply to.

The versions of the paper that follow are the versions that were submitted during the peer review process. They are not the versions of record or the final published versions. They should not be cited or distributed as the published version of this manuscript.

BMJ Open is an open access journal and the full, final, typeset and author-corrected version of record of the manuscript is available on our site with no access controls, subscription charges or pay-per-view fees (<http://bmjopen.bmj.com>).

If you have any questions on BMJ Open's open peer review process please email [info.bmjopen@bmj.com](mailto:info.bmjopen@bmj.com)

# BMJ Open

## Measurement properties of mental health literacy scale (MHLS) validation studies: a systematic review protocol

|                               |                                                                                                                                                                                                                                                                                                                                                                                                                                                                                                                                                                                                                                                                                                                                                                                                                                        |
|-------------------------------|----------------------------------------------------------------------------------------------------------------------------------------------------------------------------------------------------------------------------------------------------------------------------------------------------------------------------------------------------------------------------------------------------------------------------------------------------------------------------------------------------------------------------------------------------------------------------------------------------------------------------------------------------------------------------------------------------------------------------------------------------------------------------------------------------------------------------------------|
| Journal:                      | <i>BMJ Open</i>                                                                                                                                                                                                                                                                                                                                                                                                                                                                                                                                                                                                                                                                                                                                                                                                                        |
| Manuscript ID                 | bmjopen-2023-081394                                                                                                                                                                                                                                                                                                                                                                                                                                                                                                                                                                                                                                                                                                                                                                                                                    |
| Article Type:                 | Protocol                                                                                                                                                                                                                                                                                                                                                                                                                                                                                                                                                                                                                                                                                                                                                                                                                               |
| Date Submitted by the Author: | 31-Oct-2023                                                                                                                                                                                                                                                                                                                                                                                                                                                                                                                                                                                                                                                                                                                                                                                                                            |
| Complete List of Authors:     | ElKhalil, Rouwida; United Arab Emirates University, Public Health Institute<br>AlMekkawi, Mohamad; Fatima College of Health Sciences, Nursing Department<br>O'Connor, Matt; ConnectEd Counselling and Consultancy<br>Sherif, Moustafa; United Arab Emirates University, Public Health Institute<br>Masuadi, Emad; United Arab Emirates University, Public Health Institute<br>Ahmed, Luai; United Arab Emirates University College of Medicine and Health Sciences, Institute of Public Health<br>Al-Rifai, Rami H.; United Arab Emirates University, Institute of Public Health, College of Medicine and Health Sciences<br>Belfakir, Messaouda; United Arab Emirates University, Public Health Institute<br>Bayoumi, Rasha; University of Birmingham Dubai, School of Psychology<br>Elbarazi, Iffat; United Arab Emirates University |
| Keywords:                     | Health Literacy, MENTAL HEALTH, Patient Reported Outcome Measures, Psychometrics, Systematic Review                                                                                                                                                                                                                                                                                                                                                                                                                                                                                                                                                                                                                                                                                                                                    |
|                               |                                                                                                                                                                                                                                                                                                                                                                                                                                                                                                                                                                                                                                                                                                                                                                                                                                        |

SCHOLARONE™  
Manuscripts

## Measurement properties of mental health literacy scale (MHLS) validation studies: a systematic review protocol

---

Rouwida ElKhalil <sup>1</sup>, Mohamad AlMekkawi <sup>2</sup>, Matt O'Connor <sup>3</sup>, Moustafa Sherif <sup>1</sup>, Emad Masuadi<sup>1</sup>, Luai A. Ahmed <sup>1</sup>, Rami H. AlRifai <sup>1</sup>, Messaouda Belfakir<sup>1</sup>, Rasha Bayoumi <sup>4</sup>, Iffat Elbarazi <sup>1\*</sup>

*\*Corresponding Author:* Iffat Elbarazi, email [ielbarazi@uaeu.ac.ae](mailto:ielbarazi@uaeu.ac.ae), P.O. Box 15551, office +97137137643, mobile +971585939520, *Institute of Public Health, College of Medicine and Health Sciences (CMHS), United Arab Emirates University, Al Ain, United Arab Emirates.*

<sup>1</sup>Institute of Public Health, United Arab Emirates University, Al Ain, United Arab Emirates.

<sup>2</sup>Nursing Department, Fatima College of Health Sciences, Al Ain, United Arab Emirates.

<sup>3</sup>ConnectEd Counselling and Consultancy, Queensland, Australia.

<sup>4</sup>School of Psychology, Birmingham University, Dubai, United Arab Emirates.

**Word count:** 3173

**Keywords:** Cross-Cultural adaptation; Instrument validation; Measurement properties; Psychometric analysis; Translation.

## ABSTRACT

**Introduction:** Mental health literacy MHL is essential for improving mental health and reducing inequities in treatment. Validated and reliable MHL evaluation instruments are essential for accurate data collection and to guide mental health policy and practice. The Mental Health Literacy Scale MHLS was designed to address these limitations and produce a valid and reliable assessment tool for MHL. It has been used in various cultural and language contexts, making it valuable for cross-cultural research studies. This systematic review will examine the measurement properties of the Mental Health Literacy Scale (MHLS) in different languages, enabling academics, clinicians, and policymakers to make informed judgments regarding its use in mental health literacy assessments.

**Methods and analysis:** The review will adhere to the COSMIN methodology for systematic reviews of Patient Reported Outcome Measures (PROMs) and JBI Manual for Evidence Synthesis and will be presented following PRISMA 2020 Checklist. The review will be conducted in four stages, including an initial search confined to PubMed, a search of electronic scientific databases MEDLINE, Embase, Scopus, and EBSCOhost (PsycINFO, CINAHL, and ERIC), an examination of the reference lists of all papers to locate relevant publications, and finally contacting the MHLS original author to identify validation studies that the searches will not retrieve.

**Ethics and dissemination:** Ethics approval is not required. Publication will be done in peer-reviewed journals and at national and international conferences.

**PROSPERO registration number:** CRD42023430924.

## Strengths and Limitations

- This review analyses the measurement properties of all language versions of the MHLS, emphasizing the importance of researchers measuring MHL in various settings.
- This review will adhere to the JBI Manual for Evidence Synthesis (Chapter 12: Systematic reviews of measurement properties) and the COSMIN methodology for systematic reviews of Patient-Reported Outcome Measures (PROMs) user manual and will be reported according to the Preferred Reporting Items for Systematic Reviews and Meta-Analyses guideline (PRISMA 2020).
- This systematic review is limited by the temporal discrepancy between the Mental Health Literacy Scale (MHLS) development in 2015 and the available resources for measurement properties quality evaluation, which existed after 2018.
- We anticipate that the heterogeneity of the studies will impact the ability to do meta-analyses.

## INTRODUCTION

Mental health is an integral part of total health and well-being. Millions of individuals worldwide have a mental illness, with depression alone affecting over 280 million people <sup>1</sup>. Mental health literacy (MHL) is the "knowledge and beliefs about mental disorders which aid their recognition, management or prevention"<sup>2</sup>. MHL is critical for improving mental health and reducing inequities in mental health treatment. It assists individuals in recognizing their symptoms, locating resources, and receiving necessary assistance <sup>3</sup>.

For accurate data collection and to guide mental health policy and practice, valid and reliable MHL evaluation instruments are essential. Validated instruments assist with collecting more accurate, reliable, and comparable data across contexts and cultures than instruments that have not undergone sufficient

1 psychometric development. Utilizing validated instruments to evaluate MHL is essential for designing  
2 effective strategies to improve mental health outcomes. They assist academics and policymakers in  
3 identifying knowledge gaps in MHL and developing culturally appropriate solutions tailored to individual  
4 and community needs. In addition, they support the evaluation of mental health interventions to ensure they  
5 are evidence-based, influenced by current research findings, and assessed using reliable information <sup>4</sup>.  
6 Developing a MHL instrument requires having a clear operational definition of the construct <sup>5,6</sup>. This  
7 construct is evaluated using two approaches, namely the Vignette Approach and Scale-based  
8 Measurements<sup>7</sup>. The Vignette Approach is "described as stories about individuals and situations which  
9 refer to important points in the study of perceptions, beliefs, and attitudes" <sup>8</sup>. This approach has limitations,  
10 such as the inability to compare items within the scale, understand the differences between MHL  
11 components, and track improvement over time. Scale-based Measurements, also called patient-reported  
12 outcome measures (PROMs), are "measurement instruments that patients complete to provide information  
13 on aspects of their health status that are relevant to their quality of life, including symptoms, functionality,  
14 and physical, mental and social health." <sup>9</sup>. However, the psychometric tests of PROMs have shown  
15 significant limitations in measuring MHL <sup>10,11</sup>.

16 Following a systematic assessment of MHL instruments in 2014, O'Connor and Casey designed the  
17 Mental Health Literacy Scale (MHLS) to address these limitations and produce a valid and reliable  
18 assessment tool for MHL <sup>7</sup>. The MHLS is the only instrument capable of measuring all aspects of mental  
19 health literacy <sup>12</sup>. The authors introduced the MHLS as a unidimensional measurement scale with 35 items  
20 and six attributes based on Jorm's six mental health literacy attributes <sup>2</sup>. The scale items were generated  
21 using a combination of adaption of existing MHL items, descriptors from the Diagnostic and Statistical  
22 Manual of Mental Disorders DSM-IV-TR<sup>21</sup>, national and international data, and the clinical experience of  
23 the authors and their clinical panel who advised the item generation. The scale score ranges from 35 to 160,  
24 with a higher score implying a higher level of mental health literacy. The scale has the following sections:  
25 recognition of disorders (eight items measured on a 4-point Likert scale), knowledge of risk factors and  
26 causes (two items measured on a four-point Likert scale), self-treatment knowledge (two items measured  
27 on a 4-point Likert scale), knowledge of professional help available (three items measured on a four-point  
28 Likert scale), knowledge of how to seek mental health information (four items measured on a five Likert-  
29 scale), and attitudes that promote recognition and appropriate help-seeking (16 items measured on a 5-point  
30 Likert scale), with items 10, 12, 15, and 20–28 as reverse-scored items <sup>7</sup>.

31 The MHLS has been used in various cultural and language contexts, making it a valuable instrument  
32 for cross-cultural research studies <sup>13</sup>. Modification and cultural adaptation of research instruments have  
33 numerous advantages over creating new ones. It permits comparisons of research outcomes from different  
34 cultures, facilitating international scientific collaboration and reducing costs and time <sup>14,15</sup>. According to  
35 Arafat, Chowdhury, Qusar and Hafez <sup>14</sup>, cross-cultural validation involves translation, adaption,  
36

1 measurement of reliability (repeatability and internal consistency), evaluation of validity (content validity,  
2 face validity, construct validity, and criterion validity), and responsiveness.

### 3 **Aims**

4  
5  
6 this systematic review is significant to researchers aiming to measure MHL in diverse settings as it  
7 evaluates and compares the measurement properties of all language versions of the MHLS. While the  
8 MHLS has been culturally adapted and translated into numerous languages, comprehensive reviews of the  
9 adapted versions are lacking, leaving minimal evidence regarding their measurement properties<sup>13,16</sup>.  
10 Consequently, this review aims to fill this gap by providing new insights into the measurement properties  
11 of the MHLS across different language versions. The findings of this review will be valuable for academics,  
12 clinicians, and policymakers, enhancing their understanding of the MHLS's reliability and validity in  
13 various cultural and language contexts. Furthermore, this review will contribute to the theoretical  
14 framework surrounding MHLS validation, guide future research initiatives, and facilitate collaborations  
15 with top researchers and publications in the field of MHLS validation. We aim to critically summarize,  
16 assess, and compare the measurement properties of all language versions of the MHLS by systematically  
17 examining the methodological quality and findings of the available publications. The objectives are to  
18 summarize the utilized adaptation /validation processes employed in MHLS validation studies, to assess  
19 the methodological quality of studies evaluating the measurement properties of the MHLS across several  
20 language versions, and to compare and synthesize the findings of studies that examined the measurement  
21 properties of the MHLS in different language versions, such as its reliability, validity, and responsiveness,  
22 by qualitatively summarizing or quantitatively pooling the results.  
23  
24  
25  
26  
27  
28  
29  
30  
31  
32  
33

### 34 **METHODS**

35  
36 This systematic review will be conducted between September 2023 and December 2023. This protocol  
37 adheres to items outlined under the Preferred Reporting Items for Systematic Reviews and Meta-Analysis  
38 (PRISMA) Protocol<sup>17</sup>. The proposed systematic review will adhere to the JBI Manual for Evidence  
39 Synthesis (Chapter 12: Systematic Reviews of Measurement Properties)<sup>18</sup> and COSMIN methodology for  
40 systematic reviews of Patient-Reported Outcome Measures (PROMs)<sup>19</sup>. The results will be presented  
41 according to Preferred Reporting Items for Systematic Reviews and Meta-Analyses (PRISMA 2020)<sup>20</sup>.  
42 The systematic review methodology is summarized in Fig. 1. The study is registered at PROSPERO under  
43 the ID number CRD42023430924.  
44  
45  
46  
47  
48

49 **Fig. 1.** Systematic review methodology summary

### 50 **Search strategy**

51  
52 The review will begin with forming a research team of individuals with content and methodological  
53 competence<sup>21</sup>. The team will advise on the overarching research question and the entire study protocol,  
54  
55  
56  
57  
58  
59  
60

including identifying the search terms and databases. The review will be conducted in four stages, as specified by The Joanna Briggs Institute's Standards<sup>18</sup>.

In the first stage, an initial search of the PubMed database will be done using a sensitive search filter to find studies on the measurement properties of MHLS (see Supplementary 3). The initial search will follow<sup>22</sup> 'Filter 1: Sensitive search filter for measurement properties' because it guarantees 97.4% sensitive and 4.4% precise results (Table 1). In the second stage, we will search the electronic scientific databases MEDLINE, Embase, Scopus, and EBSCOhost (PsycINFO, CINAHL, and ERIC) using the final Boolean expression created in the previous phase (see Supplementary 1). In the third stage, the reference lists of all papers included in the second stage will be examined, and more relevant publications will be located and incorporated into this study. In the final stage, the MHLS original author will be contacted to identify validation studies not retrieved in the previous searches. The search filters (see Supplementary 3) were combined with phrases searched for the concept of interest (Mental Health Literacy) "AND" the measuring instrument of interest (Mental Health Literacy Scale). However, no population search was added because there were no population type, age, or setting restrictions. These searches were paired with the measurement properties search filter to locate all studies on the MHLS measurement properties that assess mental health literacy in all populations. For a more thorough search, we used the sensitive filter. The exclusion filter was used to eliminate records from the search, such as case studies and animal studies.

**Table 1**  
Systematic review search strategy. *Adopted form*<sup>22</sup>

| Search Strategy |                                                                                  |
|-----------------|----------------------------------------------------------------------------------|
| #1              | Construct Search (Mental Health Literacy)                                        |
| #2              | Instrument Search (Mental Health Literacy Scale)                                 |
| #3              | #1 AND #2 AND Sensitive filter for measurement properties (See Supplementary 3A) |
| #4              | #3 NOT exclusion search filter (See Supplementary 3B)                            |

### Study screening and selection

The screening and selection approach will be summarized using the Preferred Reported Items in Systematic Reviews and Meta-analysis (PRISMA) flowchart<sup>23</sup>. Our review question and inclusion criteria are framed using the PICO (Population, Instruments, Construct, Outcomes) method<sup>18</sup>. Eligibility criteria, as shown in Table 2, are as follows: (1) *Participants*: The review will consider studies that validate the MHLs in any population (e.g., community representation, students, perinatal patients, or health professionals) without restricting participants' age group; *Context*: The review will consider all primary research that validated the MHLS in all global settings (i.e., as acute care, primary health care, or the community); (2) *Instrument and Construct*: The review will focus solely on O'Connor and Casey<sup>7</sup> MHLS; (3) *Outcomes*: Measurement properties (reliability, validity, and responsiveness) of adapted MHLS will be assessed and reported based on the individual study as in Table 3<sup>18</sup>; (4) *Types of Sources*: The review will consider primarily published

designs empirically validating the MHLS, including translation and cultural adaptation, reliability, and validity testing using various statistical analyses<sup>14</sup>. The aim of the included studies should be the evaluation of one or more measurement properties<sup>19</sup>. This review will exclude studies that only use the MHLS as an outcome measure; (5) *Language*: Only English papers published will be eligible for review. Non-English publications will be excluded during the screening phase; (6) *Date*: Since the MHLS was created in 2015, only studies published between 2015 and 2022 will be considered.

The retrieved literature will be imported into Covidence. The publications will be screened in two steps: The title and abstract will be reviewed, then the full text will be examined. Two reviewers will independently examine retrieved abstracts using this review's previously specified eligibility criteria. The author of MHLS will be contacted to identify additional studies, and citations will be searched for additional articles. Covidence will be used to identify and delete the duplicates. The two reviewers will meet at the beginning, midpoint, and end of the abstract review process to discuss concerns and uncertainties relating to study selection and, if necessary, alter the search approach. Another two researchers will independently review the full manuscripts. A third reviewer will make the final judgment when there is disagreement over research inclusion. The systematic review will document and report the reasons for excluding full-text papers that do not match the inclusion criteria. Finally, reviewed articles will be retained for synthesis.

**Table 2**  
Systematic review inclusion and exclusion criteria.

| Inclusion Criteria                                                                                                                            | Exclusion Criteria                                                           |
|-----------------------------------------------------------------------------------------------------------------------------------------------|------------------------------------------------------------------------------|
| 1. <b>Participants:</b> Any population or age group<br><b>Context:</b> All settings in any country.                                           | 1. Non-English studies                                                       |
| 2. <b>Instrument and Construct:</b> Mental Health Literacy Scale (MHLS), O'Conner and Casey 2015 assess the mental health literacy construct. | 2. Grey literature (non-peer-reviewed publications or documents of any type) |
| 3. <b>Outcomes:</b> Reliability, validity, and responsiveness.                                                                                | 3. Other mental health literacy measures                                     |
| 4. <b>Types of sources:</b> Validation studies                                                                                                | 4. Studies that only use the MHLS as an outcome measure.                     |
| 5. <b>Language:</b> English                                                                                                                   |                                                                              |
| 6. <b>Date:</b> 2015 to 2022                                                                                                                  |                                                                              |

**Table 3**  
Systematic review outcomes: measurement properties. *Adopted form*<sup>18</sup>

| Main Outcomes         | Effect Measures                                                                                                                                                                                                                                                                                                                             |
|-----------------------|---------------------------------------------------------------------------------------------------------------------------------------------------------------------------------------------------------------------------------------------------------------------------------------------------------------------------------------------|
| 1. <b>Reliability</b> | Cronbach's alpha coefficients, <i>or</i> intra-class correlation coefficients (ICC), <i>or</i> weighted or un-weighted Kappa, <i>or</i> standard error of measurement (SEM), <i>or</i> limits of agreement (LoA), <i>or</i> smallest detectable change (SDC), <i>or</i> concordance correlation coefficients<br>goodness of fit statistics. |
| 2. <b>Validity</b>    |                                                                                                                                                                                                                                                                                                                                             |



- 1  
2  
3  
4  
5  
6  
7  
8  
9  
10  
11  
12  
13  
14  
15  
16  
17  
18  
19  
20  
21  
22  
23
- i. *Content validity* Purpose, target population, the comprehensiveness of the instrument, floor or ceiling effects (if available), *and* relevant items for the construct [Content Validity Index( CVI), *or* Index of Item Objective Congruence (IOC)].
  - ii. *Structural validity* Factor analysis and Comparative Fit Index (CFI), *and* Tucker-Lewis Index (TLI), *and* Root Mean Square Error of Approximation (RMSEA), *and* Standardized Root Mean Residuals (SRMR).
  - iii. *Hypothesis testing* Absolute or relative differences or correlations between MHLS with other instruments, *or* Absolute or relative differences or correlations between MHLS with two groups of participants.
  - iv. *Cross-cultural validity* The Differential Item Functioning (DIF).
  - v. *Criterion validity* Correlations, *or* Areas under Receiver Operating Curves (ROC), *or* Sensitivity and Specificity.
- 3. Responsiveness** Absolute or relative correlations, *or* Differences of the change scores, *or* The Areas under Receiver Operating Curves (ROC), *or* Sensitivity and specificity.
- 

### Data charting

24  
25  
26  
27  
28  
29  
30  
31  
32  
33  
34  
35  
36  
37  
38  
39  
40  
41  
42  
43

Two independent reviewers will do data extraction and methodological quality assessment of full-text articles that meet the inclusion criteria using the COSMIN Microsoft Excel 365® spreadsheet template that the reviewers adapted. Before beginning the review, we will conduct calibration exercises to ensure consistency among reviewers. The data charting instruments (See Supplementary 2) were adapted from the COSMIN methodology for systematic reviews of the Patient-Reported Outcome Measures (PROMs) user manual<sup>19</sup>. Disagreements between the reviewers will be handled through discussion or with the assistance of a third reviewer. We will contact the authors of the study to resolve any uncertainties. The three focus areas, utilized validation/adaptation process, measurement properties quality, and results (rating), will guide our data "charting." We will also chart data by publication year, Instrument administration (Country, Target Language, Setting), characteristics of the included sample [Age Mean (SD), Gender (% female), Sample size and calculation], MHLS score, and reported MHLS item modifications.

44  
45  
46  
47  
48  
49  
50  
51  
52  
53  
54  
55  
56  
57

We will determine the quality of the measurement properties by using the COSMIN Risk of Bias (RoB) checklist, which will be filled out to evaluate the methodological quality of each study or the risk of bias in the study's findings. The following nine boxes from the checklist will be used: PROM development, Content validity, Structural validity, Internal consistency, Cross-cultural validity/Measurement invariance, Reliability, Measurement error, Criterion validity, Hypothesis testing for construct validity, and Responsiveness. Only the boxes for the measurement properties reviewed in the article will be evaluated using the RoB, which should be used as a modular tool<sup>19</sup>. Rating options for Items under each box are 'very good,' 'adequate,' 'doubtful,' 'inadequate,' or 'Not Applicable.' To establish the overall quality of a study, the

lowest rating of any standard in the box will be used (i.e., "the worst score counts" principle). For example, if one item in a box is scored as 'inadequate' for a reliability study, the total methodological quality of that reliability research is graded as 'inadequate.' The translation process methodological quality will be determined by using the COSMIN Study Design checklist that provides standards for translating an existing PROM in the box Translation process<sup>24</sup>. In addition, the results of measurement properties will be rated based on the criteria presented in Table 4. Ratings will vary from (+) positive, (-) negative, and (?) indeterminate ratings according to individual study measurement property results<sup>19</sup>. The content validity rating criteria results were based on the COSMIN methodology guidelines for assessing the content validity of the PROMs User manual<sup>22</sup>.

#### Data synthesis, levels of evidence, and meta-analyses

The results will either be quantitatively or qualitatively combined. We will present these pooled or summarized results per measurement property (See Supplementary 2), together with a grade for the quality of the evidence (high, moderate, low, or extremely low) and a rating of the pooled or summarized results (+ /- /?).

**Table 4**

Quality criteria for measurement properties. *Adapted from*<sup>19,22,25</sup>

| Property                                       | Rating <sup>b</sup> | Quality criteria                                                                                                                                                                             |
|------------------------------------------------|---------------------|----------------------------------------------------------------------------------------------------------------------------------------------------------------------------------------------|
| <b>Reliability</b>                             |                     |                                                                                                                                                                                              |
| Internal Consistency                           | +                   | Cronbach alphas $\geq .70$                                                                                                                                                                   |
|                                                | ?                   | Cronbach alpha not determined.                                                                                                                                                               |
|                                                | -                   | Cronbach alphas $< .70$                                                                                                                                                                      |
| Reliability                                    | +                   | ICC/weighted kappa $\geq .70$ OR Pearson $r \geq .80$                                                                                                                                        |
|                                                | ?                   | Neither ICC/weighted kappa nor Pearson $r$ determined                                                                                                                                        |
|                                                | -                   | ICC/weighted kappa $.70$ OR Pearson $r .80$                                                                                                                                                  |
| Measurement Error                              | +                   | MIC > SDC OR MIC outside the LOA                                                                                                                                                             |
|                                                | ?                   | MIC not defined                                                                                                                                                                              |
|                                                | -                   | MIC $\leq$ SDC OR MIC equals or inside LOA                                                                                                                                                   |
| <b>Validity</b>                                |                     |                                                                                                                                                                                              |
| Structural validity                            | +                   | CTT:<br>CFA: CFI or TLI or comparable measure $> 0.95$ OR RMSEA $< 0.08$<br>EFA: Factors should explain at least 60% of the variance                                                         |
|                                                | ?                   | CTT: Not all information for '+' reported Or Explained variance not mentioned                                                                                                                |
|                                                | -                   | Criteria for '+' not met OR Factors explain $< 60\%$ of the variance                                                                                                                         |
| Hypotheses testing for construct validity      | +                   | The result is in accordance with the hypothesis.                                                                                                                                             |
|                                                | ?                   | No hypothesis was defined (by the review team)                                                                                                                                               |
|                                                | -                   | The result is not in accordance with the hypothesis.                                                                                                                                         |
| Cross-cultural validity/measurement invariance | +                   | No important differences were found between group factors (such as age, gender, language) in multiple group factor analysis OR no important DIF for group factors (McFadden's $R^2 < 0.02$ ) |
|                                                | ?                   | No multiple group factor analysis OR DIF analysis was performed.                                                                                                                             |

|    |                    |   |                                                                                  |
|----|--------------------|---|----------------------------------------------------------------------------------|
| 1  |                    |   |                                                                                  |
| 2  |                    | - | Important differences between group factors OR DIF were                          |
| 3  |                    |   | found.                                                                           |
| 4  | Criterion validity | + | Correlation with gold standard $\geq 0.70$ OR AUC $\geq 0.70$ X                  |
| 5  |                    | ? | Not all information for '+' reported                                             |
| 6  |                    | - | Correlation with gold standard $< 0.70$ OR AUC $< 0.70$                          |
| 7  | Responsiveness     | + | The result is in accordance with the hypothesis <sup>7</sup> OR AUC $\geq 0.70$  |
| 8  |                    | ? | No hypothesis was defined (by the review team)                                   |
| 9  |                    | - | The result is not in accordance with the hypothesis <sup>7</sup> OR AUC $< 0.70$ |
| 10 |                    |   |                                                                                  |
| 11 | Content validity   | + | The Relevance Rating is +, the Comprehensiveness Rating is +,                    |
| 12 |                    |   | and the COMPREHENSIBILITY RATING is +                                            |
| 13 |                    | - | The Relevance Rating is -, the Comprehensiveness Rating is -,                    |
| 14 |                    |   | and the Comprehensibility Rating is -                                            |
| 15 |                    | ± | At least one of the ratings is +, and at least one of the ratings is -           |
| 16 |                    | ? | Two or more of the ratings are rated?                                            |
| 17 |                    |   |                                                                                  |
| 18 |                    |   |                                                                                  |

---

<sup>a</sup> MIC=minimal important change, SDC=smallest detectable change, LOA=limits of agreement, ICC=intraclass correlation coefficient, DIF=differential item functioning, AUC=area under the curve.

<sup>b</sup> +=positive rating, ?=indeterminate rating, -= negative rating, ±= mixed ratings (*content validity only*)

### Quantitatively pooling the results

When there are more than two investigations per measurement property and language version, meta-analyses will be conducted, and the findings will be statistically pooled. Calculating weighted averages (depending on the number of participants participating in each research) and 95% confidence intervals will yield pooled estimates of measurement properties. To conduct meta-analyses, we will be consulting a statistician.

### Qualitatively summarizing result

If it is impossible to pool the results statistically, the results of each measurement property should be summed up qualitatively. For example, we will provide the range (lowest and highest) of Cronbach's alpha values found for internal consistency, the percentage of confirmed hypotheses for construct validity, or the range of each model fit parameter on a consistently found factor structure in structural validity studies.

### Applying measurement properties criteria to the pooled or summarized results

The pooled or summarized result per measurement property per language version of MHLS will again be rated using the same quality standards for good measurement properties (Table 4). The overall assessment of the combined or summed outcome may be positive (+), negative (-), or indeterminate rating (?). The ratings will be provided in the summary of findings tables (See Supplementary 2).

Using the GRADE approach, which is a systematic approach to rating the certainty of evidence in systematic reviews, the following four factors will be considered when evaluating measurement properties to determine the quality of the evidence in this systematic review (Table 5): (1) risk of bias (i.e., quality of

the studies' methodology), (2) inconsistency (i.e., unexplained, inconsistent results across studies), (3) imprecision (i.e., the total sample size of the available studies), and (4) indirectness (i.e., evidence from different populations than the population of interest in the review )<sup>19</sup>.

**Table 5**  
Definitions of quality levels. *Adopted from*<sup>19</sup>

| Quality Level   | Definition                                                                                                                                                                                                                        |
|-----------------|-----------------------------------------------------------------------------------------------------------------------------------------------------------------------------------------------------------------------------------|
| <b>High</b>     | We are very confident that the true measurement property lies close to that of the estimate* of the measurement property.                                                                                                         |
| <b>Moderate</b> | We are moderately confident in the measurement property estimate: the true measurement property is likely to be close to the estimate of the measurement property, but there is a possibility that it is substantially different. |
| <b>Low</b>      | Our confidence in the measurement property estimate is limited: the true measurement property may be substantially different from the estimate of the measurement property.                                                       |
| <b>Very low</b> | We have very little confidence in the measurement property estimate: the true measurement property is likely to be substantially different from the estimate of the measurement property.                                         |

\* *Estimate of the measurement property refers to the pooled or summarized result of the measurement property of a PROM.*

### Data presentation

The data gathered from the included papers will be presented in a tabular format, with the table reporting essential findings relevant to the review topic. The tabulated data will accompany a narrative summary describing how the results relate to the review objective and question.

## DISCUSSION

MHL is essential for enhancing mental health and decreasing treatment disparities. It aids individuals in detecting their symptoms, locating relevant resources, and receiving appropriate assistance<sup>3</sup>. Improving and sustaining healthcare delivery is a challenge for practitioners and policymakers. Patients provide unique insights into healthcare quality, yet they are an underutilized resource for measuring it. This systematic review evaluating and comparing the measurement properties of all language versions of the MHLS will shed new light on the measurement qualities of the MHLS in different language versions. This review will enable academics, clinicians, and policymakers to understand the reliability and validity of the Mental Health Literacy Scale (MHLS) across diverse cultural and linguistic contexts, allowing them to make informed judgments regarding its use in mental health literacy assessments<sup>4</sup>. We believe this systematic review is relevant and will significantly contribute to filling the current research gap.

### Author Contributions

The concept and design of the study were conceived by RE, IE, EM, and MA. MS and RE collaborated on developing the search strategy. RE, MA, IE, and MS will finish the literature review. Data extraction will be performed by RE and MB. EM provided statistical expertise. MO provided expert advice on PROM. RA drafted the initial version of this manuscript and will also compose the final systematic review. LA, RA, and RB contributed additional text and revisions and offered further input. MA, MO, and IE reviewed and supervised the work on the manuscript. All authors examined and approved the submitted version.

**Funding:** The authors have not declared a specific grant for this research from any funding agency in the public, commercial or not-for-profit sectors.

**Competing interests:** None declared.

**Patient consent:** Not applicable.

**Patient and public involvement:** Patients and/or the public were not involved in the design, or conduct, or reporting, or dissemination plans of this research.

**Acknowledgements:** We thank Dr Zufishan Alam for assistance in problem-solving data search issues.

**Provenance and peer review:** Not commissioned; externally peer reviewed.

**Open Access:** This is an open access article distributed in accordance with the Creative Commons Attribution Non Commercial (CC BY-NC 4.0) license, which permits others to distribute, remix, adapt, build upon this work non-commercially, and license their derivative works on different terms, provided the original work is properly cited, appropriate credit is given, any changes made indicated, and the use is non-commercial. See: <http://creativecommons.org/licenses/by-nc/4.0/>

1  
2  
3  
4  
5  
6  
7  
8  
9  
10  
11  
12  
13  
14  
15  
16  
17  
18  
19  
20  
21  
22  
23  
24  
25  
26  
27  
28  
29  
30  
31  
32  
33  
34  
35  
36  
37  
38  
39  
40  
41  
42  
43  
44  
45  
46  
47  
48  
49  
50  
51  
52  
53  
54  
55  
56  
57  
58  
59  
60  

## REFERENCES

1. WHO. *WHO menu of cost-effective interventions for mental health*. World Health Organization; 2021.
2. Jorm AF, Korten AE, Jacomb PA, Christensen H, Rodgers B, Pollitt P. "Mental health literacy": a survey of the public's ability to recognise mental disorders and their beliefs about the effectiveness of treatment. *Medical journal of Australia*. 1997;166(4):182-186.
3. Jorm AF. Mental health literacy: empowering the community to take action for better mental health. *American psychologist*. 2012;67(3):231.
4. WHO. *Promoting mental health: Concepts, emerging evidence, practice: Summary report*. World Health Organization; 2004.
5. Kutcher S, Wei Y, Coniglio C. Mental health literacy: Past, present, and future. *The Canadian Journal of Psychiatry*. 2016;61(3):154-158.
6. Spiker DA, Hammer JH. Mental health literacy as theory: current challenges and future directions. *Journal of Mental Health*. 2019;28(3):238-242.
7. O'Connor M, Casey L. The Mental Health Literacy Scale (MHLS): A new scale-based measure of mental health literacy. *Psychiatry research*. 2015;229(1-2):511-516.
8. Hughes R. Considering the vignette technique and its application to a study of drug injecting and HIV risk and safer behaviour. *Sociology of health & illness*. 1998;20(3):381-400.
9. CIHI. PROMs Background Document. presented at: Canadian Institute for Health Information (CIHI); 2015; [https://www.cihi.ca/sites/default/files/proms\\_background\\_may21\\_en-web\\_0.pdf](https://www.cihi.ca/sites/default/files/proms_background_may21_en-web_0.pdf)
10. Chaves C, Sequeira C, Duarte JC, Nelas PA, Gonçalves A, Santos EJRd. Mental health literacy: a systematic review of the measurement instruments. 2021;
11. O'Connor M, Casey L, Clough B. Measuring mental health literacy—a review of scale-based measures. *Journal of mental health*. 2014;23(4):197-204.
12. Montagni I, González Caballero JL. Validation of the mental health literacy scale in French university students. *Behavioral Sciences*. 2022;12(8):259.
13. Krohne N, Gomboc V, Lavrič M, et al. Slovenian Validation of the Mental Health Literacy Scale (S-MHLS) on the General Population: A Four-Factor Model. *INQUIRY: The Journal of Health Care Organization, Provision, and Financing*. 2022;59:00469580211047193.
14. Arafat S, Chowdhury HR, Qusar M, Hafez M. Cross cultural adaptation and psychometric validation of research instruments: A methodological review. *Journal of Behavioral Health*. 2016;5(3):129-136.
15. Huang WY, Wong SH. Cross-Cultural Validation. In: Michalos AC, ed. *Encyclopedia of Quality of Life and Well-Being Research*. Springer Netherlands; 2014:1369-1371.
16. Speksnijder CM, Koppelaar T, Knottnerus JA, Spigt M, Staal JB, Terwee CB. Measurement properties of the quebec back pain disability scale in patients with nonspecific low back pain: systematic review. *Physical Therapy*. 2016;96(11):1816-1831.
17. Shamseer L, Moher D, Clarke M, et al. Preferred reporting items for systematic review and meta-analysis protocols (PRISMA-P) 2015: elaboration and explanation. *BMJ*. Jan 2 2015;350:g7647. doi:10.1136/bmj.g7647
18. Stephenson M, Riitano D, Wilson S, et al. Systematic reviews of measurement properties. *Joanna Briggs Institute Reviewer's Manual The Joanna Briggs Institute [Internet]*. 2020;
19. Prinsen CA, Mokkink LB, Bouter LM, et al. COSMIN guideline for systematic reviews of patient-reported outcome measures. *Quality of life research*. 2018;27:1147-1157.
20. Page MJ, McKenzie JE, Bossuyt PM, et al. The PRISMA 2020 statement: an updated guideline for reporting systematic reviews. *International journal of surgery*. 2021;88:105906.
21. Lockwood C, Dos Santos KB, Pap R. Practical guidance for knowledge synthesis: Scoping review methods. *Asian nursing research*. 2019;13(5):287-294.

- 1 22. Terwee CB, Prinsen C, Chiarotto A, et al. COSMIN methodology for assessing the content validity  
2 of PROMs—user manual. *Amsterdam: VU University Medical Center*. 2018;
- 3 23. Tricco AC, Lillie E, Zarin W, et al. PRISMA extension for scoping reviews (PRISMA-ScR): checklist  
4 and explanation. *Annals of internal medicine*. 2018;169(7):467-473.
- 5 24. Mokkink LB, Prinsen C, Patrick DL, et al. COSMIN Study Design checklist for Patient-reported  
6 outcome measurement instruments. *Amsterdam, The Netherlands*. 2019:1-32.
- 7 25. Hair JF, Black WC, Babin BJ, Anderson RE. *Multivariate Data Analysis*. Always Learning. Pearson  
8 Education Limited London, UK.; 2013.
- 9
- 10
- 11
- 12
- 13
- 14
- 15
- 16
- 17
- 18
- 19
- 20
- 21
- 22
- 23
- 24
- 25
- 26
- 27
- 28
- 29
- 30
- 31
- 32
- 33
- 34
- 35
- 36
- 37
- 38
- 39
- 40
- 41
- 42
- 43
- 44
- 45
- 46
- 47
- 48
- 49
- 50
- 51
- 52
- 53
- 54
- 55
- 56
- 57
- 58
- 59
- 60

For peer review only

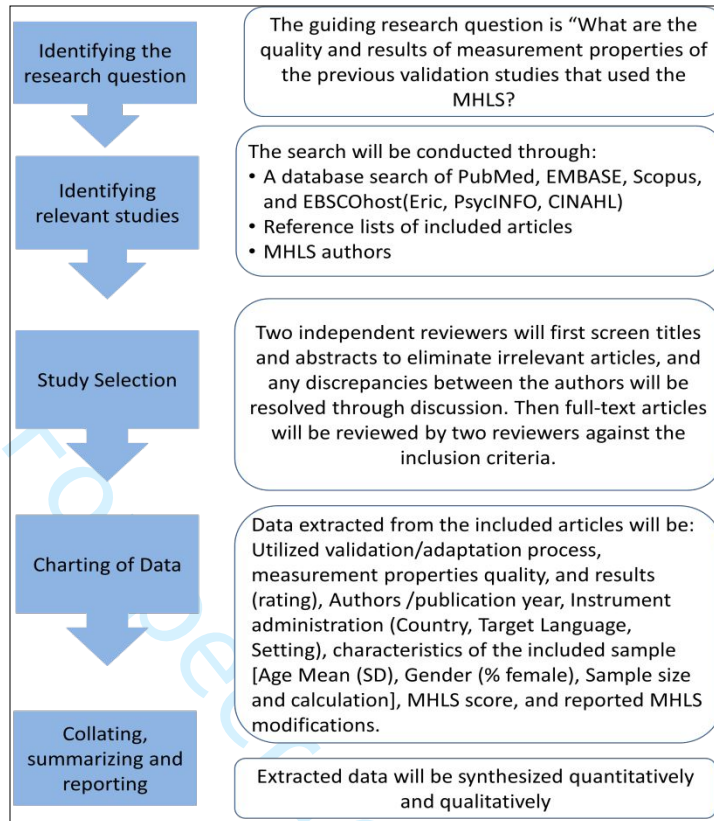

**Fig. 1.** Systematic review methodology summary



### Supplementary 1 Search Strategies

| 1.1. Search for PubMed |                                                                 |                                                                                                                                                                                                                                                                                                                                                                                                                                                                                                                                                                                                                                                                                                                                                                                                                                                                                                                                                                                                                                                                                                                                                                                                                                                                                                                                                                                                                                                                                                                                                                                                                                                                                                                                                                                                                                                                                                                                                                                                                                                                                                                                                                                                                                                                                                                                                                     |
|------------------------|-----------------------------------------------------------------|---------------------------------------------------------------------------------------------------------------------------------------------------------------------------------------------------------------------------------------------------------------------------------------------------------------------------------------------------------------------------------------------------------------------------------------------------------------------------------------------------------------------------------------------------------------------------------------------------------------------------------------------------------------------------------------------------------------------------------------------------------------------------------------------------------------------------------------------------------------------------------------------------------------------------------------------------------------------------------------------------------------------------------------------------------------------------------------------------------------------------------------------------------------------------------------------------------------------------------------------------------------------------------------------------------------------------------------------------------------------------------------------------------------------------------------------------------------------------------------------------------------------------------------------------------------------------------------------------------------------------------------------------------------------------------------------------------------------------------------------------------------------------------------------------------------------------------------------------------------------------------------------------------------------------------------------------------------------------------------------------------------------------------------------------------------------------------------------------------------------------------------------------------------------------------------------------------------------------------------------------------------------------------------------------------------------------------------------------------------------|
|                        | <i>Population Search</i>                                        | This search did not include a population search since there is no restriction on population type, age and settings                                                                                                                                                                                                                                                                                                                                                                                                                                                                                                                                                                                                                                                                                                                                                                                                                                                                                                                                                                                                                                                                                                                                                                                                                                                                                                                                                                                                                                                                                                                                                                                                                                                                                                                                                                                                                                                                                                                                                                                                                                                                                                                                                                                                                                                  |
| #1                     | <i>Instrument Search<br/>MHLS O'Conner and<br/>Casey (2015)</i> | ("mental health literacy scale*") OR (MHLS)                                                                                                                                                                                                                                                                                                                                                                                                                                                                                                                                                                                                                                                                                                                                                                                                                                                                                                                                                                                                                                                                                                                                                                                                                                                                                                                                                                                                                                                                                                                                                                                                                                                                                                                                                                                                                                                                                                                                                                                                                                                                                                                                                                                                                                                                                                                         |
| #2                     | <i>Construct search<br/>mental health literacy</i>              | ("mental health"[Title/Abstract] OR "mental health"[Title/Abstract] OR "mental health"[MeSH Terms] OR "mental stabilit*"[Title/Abstract] OR "mental balanc*"[Title/Abstract] OR "mental hygien*"[Title/Abstract] OR "sanit*"[Title/Abstract] OR "psychiatr*"[Title/Abstract] OR "life disrupt*"[Title/Abstract] OR "mental ill*"[Title/Abstract] OR "mental ill*"[Title/Abstract] OR "mental disord*"[Title/Abstract] OR "mental wellbeing*"[Title/Abstract] OR "mental well being*"[Title/Abstract] OR "mental condition*"[Title/Abstract] OR "Mental Disorders"[MeSH Terms]) AND ("Health Literacy"[MeSH Terms] OR "health literac*"[Title/Abstract] OR "health education*"[Title/Abstract] OR "health train*"[Title/Abstract] OR "health aware*"[Title/Abstract])                                                                                                                                                                                                                                                                                                                                                                                                                                                                                                                                                                                                                                                                                                                                                                                                                                                                                                                                                                                                                                                                                                                                                                                                                                                                                                                                                                                                                                                                                                                                                                                                |
| #3                     | <i>Filter for<br/>measurement<br/>properties</i>                | ("instrumentation" [Subheading]) OR "methods" [Subheading] OR "Validation Stud*"[Publication Type] OR Comparative Study[Publication Type] OR "psychometrics" [MeSH] OR psychometr*[Title/Abstract] OR clinimetr*[Text Word] OR clinometr*[Text Word] OR "Outcome Assessment, Health Care"[Mesh] OR outcome assessment[Title/Abstract] OR outcome measure*[Text Word] OR "observer variation"[MeSH] OR observer variation[Title/Abstract] OR "Health Status Indicators"[Mesh] OR "reproducibility of results"[MeSH] OR reproducib*[Title/Abstract] OR "discriminant analysis"[MeSH] OR reliab*[Title/Abstract] OR unreliab*[Title/Abstract] OR valid*[Title/Abstract] OR coefficient[Title/Abstract] OR homogeneity[Title/Abstract] OR homogeneous[Title/Abstract] OR "internal consistency"[Title/Abstract] OR (cronbach*[Title/Abstract] AND (alpha[Title/Abstract] OR alphas[Title/Abstract])) OR (item[Title/Abstract] AND (correlation*[Title/Abstract] OR selection*[Title/Abstract] OR reduction*[Title/Abstract])) OR agreement[Title/Abstract] OR precision[Title/Abstract] OR imprecision[Title/Abstract] OR "precise values"[Title/Abstract] OR test- retest[Title/Abstract] OR (test[Title/Abstract] AND retest[Title/Abstract]) OR (reliab* [Title/Abstract] AND (test[Title/Abstract] OR retest[Title/Abstract])) OR stability[Title/Abstract] OR interrater[Title/Abstract] OR inter-rater[Title/Abstract] OR intrarater[Title/Abstract] OR intra-rater[Title/Abstract] OR intertester[Title/Abstract] OR inter-tester[Title/Abstract] OR intratester[Title/Abstract] OR intra-tester[Title/Abstract] OR interobserver[Title/Abstract] OR inter-observer[Title/Abstract] OR intraobserver[Title/Abstract] OR intraobserver[Title/Abstract] OR intertechnician[Title/Abstract] OR inter-technician[Title/Abstract] OR intratechnician[Title/Abstract] OR intra-technician[Title/Abstract] OR interexaminer[Title/Abstract] OR inter-examiner[Title/Abstract] OR intraexaminer[Title/Abstract] OR intra-examiner[Title/Abstract] OR interassay[Title/Abstract] OR inter-assay[Title/Abstract] OR intraassay[Title/Abstract] OR intra-assay[Title/Abstract] OR interindividual[Title/Abstract] OR inter-individual[Title/Abstract] OR intraindividual[Title/Abstract] OR intra-individual[Title/Abstract] OR interparticipant [Title/Abstract] OR inter- |

|    |                           |                                                                                                                                                                                                                                                                                                                                                                                                                                                                                                                                                                                                                                                                                                                                                                                                                                                                                                                                                                                                                                                                                                                                                                                                                                                                                                                                                                                                                                                                                                                                                                                                                                                                                                                                                                                                                                                                                                                                                                                                                                                                                                                                                                                                                                                                                                          |
|----|---------------------------|----------------------------------------------------------------------------------------------------------------------------------------------------------------------------------------------------------------------------------------------------------------------------------------------------------------------------------------------------------------------------------------------------------------------------------------------------------------------------------------------------------------------------------------------------------------------------------------------------------------------------------------------------------------------------------------------------------------------------------------------------------------------------------------------------------------------------------------------------------------------------------------------------------------------------------------------------------------------------------------------------------------------------------------------------------------------------------------------------------------------------------------------------------------------------------------------------------------------------------------------------------------------------------------------------------------------------------------------------------------------------------------------------------------------------------------------------------------------------------------------------------------------------------------------------------------------------------------------------------------------------------------------------------------------------------------------------------------------------------------------------------------------------------------------------------------------------------------------------------------------------------------------------------------------------------------------------------------------------------------------------------------------------------------------------------------------------------------------------------------------------------------------------------------------------------------------------------------------------------------------------------------------------------------------------------|
|    |                           | <p>participant[Title/Abstract] OR intraparticipant[Title/Abstract] OR intraparticipant[Title/Abstract] OR kappa[Title/Abstract] OR kappa's[Title/Abstract] OR kappas[Title/Abstract] OR repeatab*[Title/Abstract] OR ((replicab*[Title/Abstract] OR repeated[Title/Abstract]) AND (measure[Title/Abstract] OR measures[Title/Abstract] OR findings[Title/Abstract] OR result[Title/Abstract] OR results[Title/Abstract] OR test[Title/Abstract] OR tests[Title/Abstract])) OR generaliza*[Title/Abstract] OR generalisa*[Title/Abstract] OR concordance[Title/Abstract] OR (intraclass[Title/Abstract] AND correlation*[Title/Abstract]) OR discriminative[Title/Abstract] OR "known group"[Title/Abstract] OR factor analysis[Title/Abstract] OR factor analyses[Title/Abstract] OR dimension*[Title/Abstract] OR subscale*[Title/Abstract] OR (multitrait[Title/Abstract] AND scaling[Title/Abstract] AND (analysis[Title/Abstract] OR analyses[Title/Abstract])) OR item discriminant[Title/Abstract] OR interscale correlation*[Title/Abstract] OR error[Title/Abstract] OR errors[Title/Abstract] OR "individual variability"[Title/Abstract] OR (variability[Title/Abstract] AND (analysis[Title/Abstract] OR values[Title/Abstract])) OR (uncertainty[Title/Abstract] AND (measurement[Title/Abstract] OR measuring[Title/Abstract])) OR "standard error of measurement"[Title/Abstract] OR sensitiv*[Title/Abstract] OR responsive*[Title/Abstract] OR ((minimal[Title/Abstract] OR minimally[Title/Abstract] OR clinical[Title/Abstract] OR clinically[Title/Abstract]) AND (important[Title/Abstract] OR significant[Title/Abstract] OR detectable[Title/Abstract]) AND(change[Title/Abstract] OR difference[Title/Abstract])) OR (small*[Title/Abstract] AND (real[Title/Abstract] OR detectable[Title/Abstract]) AND (change[Title/Abstract] OR difference[Title/Abstract]) OR meaningful change[Title/Abstract] OR "ceiling effect"[Title/Abstract] OR "floor effect"[Title/Abstract] OR "Item response model"[Title/Abstract] OR IRT[Title/Abstract] OR Rasch[Title/Abstract] OR "Differential item functioning"[Title/Abstract] OR DIF[Title/Abstract] OR "computer adaptive testing"[Title/Abstract] OR "item bank"[Title/Abstract] OR "cross-cultural equivalence"[Title/Abstract])</p> |
| #4 | <i>Exclusion filter</i>   | <p>("address"[Publication Type] OR "biography"[Publication Type] OR "case reports"[Publication Type] OR "comment"[Publication Type] OR "directory"[Publication Type] OR "editorial"[Publication Type] OR "festschrift"[Publication Type] OR "interview"[Publication Type] OR "lectur"[Publication Type] OR "legal case"[Publication Type] OR "legislation"[Publication Type] OR "letter"[Publication Type] OR "news"[Publication Type] OR "newspaper article"[Publication Type] OR "patient education handout"[Publication Type] OR "popular work"[Publication Type] OR "congress"[Publication Type] OR "consensus development conference"[Publication Type] OR "consensus development conference, nih"[Publication Type] OR "practice guideline"[Publication Type]) NOT ("animals"[MeSH Terms] NOT "humans"[MeSH Terms])</p>                                                                                                                                                                                                                                                                                                                                                                                                                                                                                                                                                                                                                                                                                                                                                                                                                                                                                                                                                                                                                                                                                                                                                                                                                                                                                                                                                                                                                                                                            |
| #5 | #1 AND #2 AND #3<br>NOT#4 | <p>((("mental health"[Title/Abstract] OR "mental health"[MeSH Terms] OR "mental stabilit*[Title/Abstract] OR "mental balanc*[Title/Abstract] OR "mental hygien*[Title/Abstract] OR "sanit*[Title/Abstract] OR "psychiatr*[Title/Abstract] OR "life disrupt*[Title/Abstract] OR "mental ill*[Title/Abstract] OR "mental ill*[Title/Abstract] OR "mental disord*[Title/Abstract] OR "mental wellbeing*[Title/Abstract] OR "mental well being*[Title/Abstract] OR "mental condition*[Title/Abstract] OR "Mental Disorders"[MeSH Terms]) AND ("Health Literacy"[MeSH Terms] OR "health literac*[Title/Abstract]</p>                                                                                                                                                                                                                                                                                                                                                                                                                                                                                                                                                                                                                                                                                                                                                                                                                                                                                                                                                                                                                                                                                                                                                                                                                                                                                                                                                                                                                                                                                                                                                                                                                                                                                          |

|  |  |                                                                                                                                                                                                                                                                                                                                                                                                                                                                                                                                                                                                                                                                                                                                                                                                                                                                                                                                                                                                                                                                                                                                                                                                                                                                                                                                                                                                                                                                                                                                                                                                                                                                                                                                                                                                                                                                                                                                                                                                                                                                                                                                                                                                                                                                                                                                                                                                                                                                                                                                                                                                                                                                                                                                                                                                                                                                                                                                                                                                                                                                                                                                                                                                                                                                                                                                                                                                                                                                                                                                                                                                                                                                                                                                                                                                                                                                                                                                                                                                            |
|--|--|------------------------------------------------------------------------------------------------------------------------------------------------------------------------------------------------------------------------------------------------------------------------------------------------------------------------------------------------------------------------------------------------------------------------------------------------------------------------------------------------------------------------------------------------------------------------------------------------------------------------------------------------------------------------------------------------------------------------------------------------------------------------------------------------------------------------------------------------------------------------------------------------------------------------------------------------------------------------------------------------------------------------------------------------------------------------------------------------------------------------------------------------------------------------------------------------------------------------------------------------------------------------------------------------------------------------------------------------------------------------------------------------------------------------------------------------------------------------------------------------------------------------------------------------------------------------------------------------------------------------------------------------------------------------------------------------------------------------------------------------------------------------------------------------------------------------------------------------------------------------------------------------------------------------------------------------------------------------------------------------------------------------------------------------------------------------------------------------------------------------------------------------------------------------------------------------------------------------------------------------------------------------------------------------------------------------------------------------------------------------------------------------------------------------------------------------------------------------------------------------------------------------------------------------------------------------------------------------------------------------------------------------------------------------------------------------------------------------------------------------------------------------------------------------------------------------------------------------------------------------------------------------------------------------------------------------------------------------------------------------------------------------------------------------------------------------------------------------------------------------------------------------------------------------------------------------------------------------------------------------------------------------------------------------------------------------------------------------------------------------------------------------------------------------------------------------------------------------------------------------------------------------------------------------------------------------------------------------------------------------------------------------------------------------------------------------------------------------------------------------------------------------------------------------------------------------------------------------------------------------------------------------------------------------------------------------------------------------------------------------------------|
|  |  | <p>OR "health education*" [Title/Abstract] OR "health train*" [Title/Abstract] OR "health aware*" [Title/Abstract]) AND (("instrumentation" [Subheading]) OR "methods" [Subheading] OR "Validation Stud*" [Publication Type] OR Comparative Study [Publication Type] OR "psychometrics" [MeSH] OR psychometr* [Title/Abstract] OR clinimetr* [Text Word] OR clinometr* [Text Word] OR "Outcome Assessment, Health Care" [Mesh] OR outcome assessment [Title/Abstract] OR outcome measure* [Text Word] OR "observer variation" [MeSH] OR observer variation [Title/Abstract] OR "Health Status Indicators" [Mesh] OR "reproducibility of results" [MeSH] OR reproducib* [Title/Abstract] OR "discriminant analysis" [MeSH] OR reliab* [Title/Abstract] OR unreliab* [Title/Abstract] OR valid* [Title/Abstract] OR coefficient [Title/Abstract] OR homogeneity [Title/Abstract] OR homogeneous [Title/Abstract] OR "internal consistency" [Title/Abstract] OR (cronbach* [Title/Abstract] AND (alpha [Title/Abstract] OR alphas [Title/Abstract])) OR (item [Title/Abstract] AND (correlation* [Title/Abstract] OR selection* [Title/Abstract] OR reduction* [Title/Abstract])) OR agreement [Title/Abstract] OR precision [Title/Abstract] OR imprecision [Title/Abstract] OR "precise values" [Title/Abstract] OR test- retest [Title/Abstract] OR (test [Title/Abstract] AND retest [Title/Abstract]) OR (reliab* [Title/Abstract] AND (test [Title/Abstract] OR retest [Title/Abstract])) OR stability [Title/Abstract] OR interrater [Title/Abstract] OR inter-rater [Title/Abstract] OR intrarater [Title/Abstract] OR intra-rater [Title/Abstract] OR intertester [Title/Abstract] OR inter-tester [Title/Abstract] OR intratester [Title/Abstract] OR intra-tester [Title/Abstract] OR interobserver [Title/Abstract] OR inter-observer [Title/Abstract] OR intraobserver [Title/Abstract] OR intraobserver [Title/Abstract] OR intertechnician [Title/Abstract] OR inter-technician [Title/Abstract] OR intratechnician [Title/Abstract] OR intra-technician [Title/Abstract] OR interexaminer [Title/Abstract] OR inter-examiner [Title/Abstract] OR intraexaminer [Title/Abstract] OR intra-examiner [Title/Abstract] OR interassay [Title/Abstract] OR inter-assay [Title/Abstract] OR intraassay [Title/Abstract] OR intra-assay [Title/Abstract] OR interindividual [Title/Abstract] OR inter-individual [Title/Abstract] OR intraindividual [Title/Abstract] OR intra-individual [Title/Abstract] OR interparticipant [Title/Abstract] OR inter-participant [Title/Abstract] OR intraparticipant [Title/Abstract] OR intra-participant [Title/Abstract] OR kappa [Title/Abstract] OR kappa's [Title/Abstract] OR kappas [Title/Abstract] OR repeatab* [Title/Abstract] OR ((replicab* [Title/Abstract] OR repeated [Title/Abstract]) AND (measure [Title/Abstract] OR measures [Title/Abstract] OR findings [Title/Abstract] OR result [Title/Abstract] OR results [Title/Abstract] OR test [Title/Abstract] OR tests [Title/Abstract])) OR generaliza* [Title/Abstract] OR generalisa* [Title/Abstract] OR concordance [Title/Abstract] OR (intraclass [Title/Abstract] AND correlation* [Title/Abstract]) OR discriminative [Title/Abstract] OR "known group" [Title/Abstract] OR factor analysis [Title/Abstract] OR factor analyses [Title/Abstract] OR dimension* [Title/Abstract] OR subscale* [Title/Abstract] OR (multitrait [Title/Abstract] AND scaling [Title/Abstract] AND (analysis [Title/Abstract] OR analyses [Title/Abstract])) OR item discriminant [Title/Abstract] OR interscale correlation* [Title/Abstract] OR error [Title/Abstract] OR errors [Title/Abstract] OR "individual variability" [Title/Abstract] OR (variability [Title/Abstract] AND (analysis [Title/Abstract] OR values [Title/Abstract])) OR (uncertainty [Title/Abstract] AND (measurement [Title/Abstract] OR measuring [Title/Abstract])) OR "standard error of measurement" [Title/Abstract]</p> |
|--|--|------------------------------------------------------------------------------------------------------------------------------------------------------------------------------------------------------------------------------------------------------------------------------------------------------------------------------------------------------------------------------------------------------------------------------------------------------------------------------------------------------------------------------------------------------------------------------------------------------------------------------------------------------------------------------------------------------------------------------------------------------------------------------------------------------------------------------------------------------------------------------------------------------------------------------------------------------------------------------------------------------------------------------------------------------------------------------------------------------------------------------------------------------------------------------------------------------------------------------------------------------------------------------------------------------------------------------------------------------------------------------------------------------------------------------------------------------------------------------------------------------------------------------------------------------------------------------------------------------------------------------------------------------------------------------------------------------------------------------------------------------------------------------------------------------------------------------------------------------------------------------------------------------------------------------------------------------------------------------------------------------------------------------------------------------------------------------------------------------------------------------------------------------------------------------------------------------------------------------------------------------------------------------------------------------------------------------------------------------------------------------------------------------------------------------------------------------------------------------------------------------------------------------------------------------------------------------------------------------------------------------------------------------------------------------------------------------------------------------------------------------------------------------------------------------------------------------------------------------------------------------------------------------------------------------------------------------------------------------------------------------------------------------------------------------------------------------------------------------------------------------------------------------------------------------------------------------------------------------------------------------------------------------------------------------------------------------------------------------------------------------------------------------------------------------------------------------------------------------------------------------------------------------------------------------------------------------------------------------------------------------------------------------------------------------------------------------------------------------------------------------------------------------------------------------------------------------------------------------------------------------------------------------------------------------------------------------------------------------------------------------------|

|  |                                                                                                                                                                                                                                                                                                                                                                                                                                                                                                                                                                                                                                                                                                                                                                                                                                                                                                                                                                                                                                                                                                                                                                                                                                                                                                                                                                                                                                                                                                                                                                                                                                                                                                                                                                                                                   |
|--|-------------------------------------------------------------------------------------------------------------------------------------------------------------------------------------------------------------------------------------------------------------------------------------------------------------------------------------------------------------------------------------------------------------------------------------------------------------------------------------------------------------------------------------------------------------------------------------------------------------------------------------------------------------------------------------------------------------------------------------------------------------------------------------------------------------------------------------------------------------------------------------------------------------------------------------------------------------------------------------------------------------------------------------------------------------------------------------------------------------------------------------------------------------------------------------------------------------------------------------------------------------------------------------------------------------------------------------------------------------------------------------------------------------------------------------------------------------------------------------------------------------------------------------------------------------------------------------------------------------------------------------------------------------------------------------------------------------------------------------------------------------------------------------------------------------------|
|  | <p>Title/Abstract] OR sensitiv*[Title/Abstract] OR responsive*[Title/Abstract] OR ((minimal[Title/Abstract] OR minimally[Title/Abstract] OR clinical[Title/Abstract] OR clinically[Title/Abstract]) AND (important[Title/Abstract] OR significant[Title/Abstract] OR detectable[Title/Abstract]) AND(change[Title/Abstract] OR difference[Title/Abstract])) OR (small*[Title/Abstract] AND (real[Title/Abstract] OR detectable[Title/Abstract]) AND (change[Title/Abstract] OR difference[Title/Abstract]) OR meaningful change [Title/Abstract] OR “ceiling effect”[Title/Abstract] OR “floor effect”[Title/Abstract] OR “Item response model”[Title/Abstract] OR IRT[Title/Abstract] OR Rasch[Title/Abstract] OR “Differential item functioning”[Title/Abstract] OR DIF[Title/Abstract] OR “computer adaptive testing”[Title/Abstract] OR “item bank”[Title/Abstract] OR “cross-cultural equivalence”[Title/Abstract])) NOT (“address”[Publication Type] OR “biography”[Publication Type] OR “case reports”[Publication Type] OR “comment”[Publication Type] OR “directory”[Publication Type] OR “editorial”[Publication Type] OR “festschrift”[ Publication Type] OR “interview”[Publication Type] OR “lectur*”[Publication Type] OR “legal case*”[Publication Type] OR “legislation”[Publication Type] OR “letter”[Publication Type] OR “news”[Publication Type] OR “newspaper article”[Publication Type] OR “patient education handout”[Publication Type] OR “popular work*”[Publication Type] OR “congress*” [Publication Type] OR “consensus development conference”[ Publication Type] OR “consensus development conference, nih”[Publication Type] OR “practice guideline”[ Publication Type]) NOT (“animals”[MeSH Terms] NOT “humans”[MeSH Terms])) AND (“mental health literacy scale*” OR (MHLS))</p> |
|  | <p>Result in documents<br/>Final= 6<br/>Exclusion =14 (Different tool 13-RCT 1)</p>                                                                                                                                                                                                                                                                                                                                                                                                                                                                                                                                                                                                                                                                                                                                                                                                                                                                                                                                                                                                                                                                                                                                                                                                                                                                                                                                                                                                                                                                                                                                                                                                                                                                                                                               |

\*\*Note. The initial PubMed search was conducted on June 3, 2023, and was limited to English.

**Table A2. Final Search Strategy**

|                                  |
|----------------------------------|
| <b>1.2. Search for Embase</b>    |
|                                  |
| <b>1.3. Search for PsychINFO</b> |
|                                  |
| <b>1.4. Search for CINAHL</b>    |
|                                  |
| <b>1.5. Search for ERIC</b>      |
|                                  |
| <b>1.6. Search for Medline</b>   |

## Supplementary 2 Data Charting Instruments

### 2 A. Descriptive Characteristics of The Included Studies

| #                                           | Study (Authors/year) | Study Design | Instrument Administration |          |         | Population |                  |                   |                   | Methodological Process              |                                                            | MHLS score | Reported MHLS modifications |
|---------------------------------------------|----------------------|--------------|---------------------------|----------|---------|------------|------------------|-------------------|-------------------|-------------------------------------|------------------------------------------------------------|------------|-----------------------------|
|                                             |                      |              | Country                   | Language | Setting | N          | Age Mean (SD) yr | Gender (% female) | Selection process | Summary of adaptation process steps | Adaptation process / validation process reported guideline |            |                             |
| 1.                                          |                      |              |                           |          |         |            |                  |                   |                   |                                     |                                                            |            |                             |
| 2.                                          |                      |              |                           |          |         |            |                  |                   |                   |                                     |                                                            |            |                             |
| *Sample size calculation reference provided |                      |              |                           |          |         |            |                  |                   |                   |                                     |                                                            |            |                             |

### 2 B. Results of Studies on Measurement Properties

| Study (authors/date)                       | Country (language) in which the MHLS was evaluated | Structural validity |              |                 | Internal Consistency |              |                 | Cross-cultural validity/ measurement invariance |              |                 | Reliability |              |                 |
|--------------------------------------------|----------------------------------------------------|---------------------|--------------|-----------------|----------------------|--------------|-----------------|-------------------------------------------------|--------------|-----------------|-------------|--------------|-----------------|
|                                            |                                                    | n                   | Meth quality | Result (rating) | n                    | Meth quality | Result (rating) | n                                               | Meth quality | Result (rating) | n           | Meth quality | Result (rating) |
|                                            |                                                    |                     |              |                 |                      |              |                 |                                                 |              |                 |             |              |                 |
|                                            |                                                    |                     |              |                 |                      |              |                 |                                                 |              |                 |             |              |                 |
|                                            |                                                    |                     |              |                 |                      |              |                 |                                                 |              |                 |             |              |                 |
| Pooled or summary results (overall rating) |                                                    |                     |              |                 |                      |              |                 |                                                 |              |                 |             |              |                 |

| Study (authors/date)                       | Country (language) in which the MHLS was evaluated | Measurement Error |              |                 | Criterion validity |              |                 | Hypothesis testing |              |                 | Responsiveness |              |                 |
|--------------------------------------------|----------------------------------------------------|-------------------|--------------|-----------------|--------------------|--------------|-----------------|--------------------|--------------|-----------------|----------------|--------------|-----------------|
|                                            |                                                    | n                 | Meth quality | Result (rating) | n                  | Meth quality | Result (rating) | n                  | Meth quality | Result (rating) | n              | Meth quality | Result (rating) |
|                                            |                                                    |                   |              |                 |                    |              |                 |                    |              |                 |                |              |                 |
|                                            |                                                    |                   |              |                 |                    |              |                 |                    |              |                 |                |              |                 |
|                                            |                                                    |                   |              |                 |                    |              |                 |                    |              |                 |                |              |                 |
| Pooled or summary results (overall rating) |                                                    |                   |              |                 |                    |              |                 |                    |              |                 |                |              |                 |

## 2 C. Summary of Findings Tables

| <i>Structural Validity</i> | <i>Summary or pooled results</i> | <i>Overall rating</i> | <i>Quality of evidence</i> |
|----------------------------|----------------------------------|-----------------------|----------------------------|
| PROM A                     |                                  |                       |                            |
| PROM B                     |                                  |                       |                            |
| PROM C                     |                                  |                       |                            |

| <i>Internal consistency</i> | <i>Summary or pooled results</i> | <i>Overall rating</i> | <i>Quality of evidence</i> |
|-----------------------------|----------------------------------|-----------------------|----------------------------|
| PROM A                      |                                  |                       |                            |
| PROM B                      |                                  |                       |                            |
| PROM C                      |                                  |                       |                            |

| <i>Cross-cultural validity\measurement invariance</i> | <i>Summary or pooled results</i> | <i>Overall rating</i> | <i>Quality of evidence</i> |
|-------------------------------------------------------|----------------------------------|-----------------------|----------------------------|
| PROM A                                                |                                  |                       |                            |
| PROM B                                                |                                  |                       |                            |
| PROM C                                                |                                  |                       |                            |

| <i>Reliability</i> | <i>Summary or pooled results</i> | <i>Overall rating</i> | <i>Quality of evidence</i> |
|--------------------|----------------------------------|-----------------------|----------------------------|
| PROM A             |                                  |                       |                            |
| PROM B             |                                  |                       |                            |
| PROM C             |                                  |                       |                            |

| <i>Measurement Error</i> | <i>Summary or pooled results</i> | <i>Overall rating</i> | <i>Quality of evidence</i> |
|--------------------------|----------------------------------|-----------------------|----------------------------|
| PROM A                   |                                  |                       |                            |
| PROM B                   |                                  |                       |                            |
| PROM C                   |                                  |                       |                            |

1  
2  
3  
4  
5  
6  
7  
8  
9  
10  
11  
12  
13  
14  
15  
16  
17  
18  
19  
20  
21  
22  
23  
24  
25  
26  
27  
28  
29  
30  
31  
32  
33  
34  
35  
36  
37  
38  
39  
40  
41  
42  
43  
44  
45  
46  
47

| <i>Hypothesis testing</i> | <i>Summary or pooled results</i> | <i>Overall rating</i> | <i>Quality of evidence</i> |
|---------------------------|----------------------------------|-----------------------|----------------------------|
| PROM A                    |                                  |                       |                            |
| PROM B                    |                                  |                       |                            |
| PROM C                    |                                  |                       |                            |

| <i>Responsiveness</i> | <i>Summary or pooled results</i> | <i>Overall rating</i> | <i>Quality of evidence</i> |
|-----------------------|----------------------------------|-----------------------|----------------------------|
| PROM A                |                                  |                       |                            |
| PROM B                |                                  |                       |                            |
| PROM C                |                                  |                       |                            |

For peer review only

### Supplementary 3 Search Filters

This search filter was adopted from: Terwee CB, Jansma EP, Riphagen II, de Vet HC. Development of a methodological PubMed search filter for finding studies on measurement properties of measurement instruments. Qual Life Res. 2009 Oct;18(8):1115-23. doi: 10.1007/s11136-009-9528-5. Epub 2009 Aug 27. PMID: 19711195; PMCID: PMC2744791.

#### ***Sensitive Filter for Measurement Properties***

("instrumentation" [Subheading] OR "methods" [Subheading] OR "Validation Stud\*" [Publication Type] OR Comparative Study [Publication Type] OR "psychometrics" [MeSH] OR psychometr\* [Title/Abstract] OR clinimetr\* [Text Word] OR clinometr\* [Text Word] OR "Outcome Assessment, Health Care" [Mesh] OR outcome assessment [Title/Abstract] OR outcome measure\* [Text Word] OR "observer variation" [MeSH] OR observer variation [Title/Abstract] OR "Health Status Indicators" [Mesh] OR "reproducibility of results" [MeSH] OR reproducib\* [Title/Abstract] OR "discriminant analysis" [MeSH] OR reliab\* [Title/Abstract] OR unreliab\* [Title/Abstract] OR valid\* [Title/Abstract] OR coefficient [Title/Abstract] OR homogeneity [Title/Abstract] OR homogeneous [Title/Abstract] OR "internal consistency" [Title/Abstract] OR (cronbach\* [Title/Abstract] AND (alpha [Title/Abstract] OR alphas [Title/Abstract])) OR (item [Title/Abstract] AND (correlation\* [Title/Abstract] OR selection\* [Title/Abstract] OR reduction\* [Title/Abstract])) OR agreement [Title/Abstract] OR precision [Title/Abstract] OR imprecision [Title/Abstract] OR "precise values" [Title/Abstract] OR test-retest [Title/Abstract] OR (test [Title/Abstract] AND retest [Title/Abstract]) OR (reliab\* [Title/Abstract] AND (test [Title/Abstract] OR retest [Title/Abstract])) OR stability [Title/Abstract] OR interrater [Title/Abstract] OR inter-rater [Title/Abstract] OR intrarater [Title/Abstract] OR intra-rater [Title/Abstract] OR intertester [Title/Abstract] OR inter-tester [Title/Abstract] OR intratester [Title/Abstract] OR intra-tester [Title/Abstract] OR interobserver [Title/Abstract] OR inter-observer [Title/Abstract] OR intraobserver [Title/Abstract] OR intraobserver [Title/Abstract] OR intertechnician [Title/Abstract] OR inter-technician [Title/Abstract] OR intratechnician [Title/Abstract] OR intra-technician [Title/Abstract] OR interexaminer [Title/Abstract] OR inter-examiner [Title/Abstract] OR intraexaminer [Title/Abstract] OR intra-examiner [Title/Abstract] OR interassay [Title/Abstract] OR inter-assay [Title/Abstract] OR intraassay [Title/Abstract] OR intra-assay [Title/Abstract] OR interindividual [Title/Abstract] OR inter-individual [Title/Abstract] OR intraindividual [Title/Abstract] OR intra-individual [Title/Abstract] OR interparticipant [Title/Abstract] OR inter-participant [Title/Abstract] OR kappa [Title/Abstract] OR kappa's [Title/Abstract] OR kappas [Title/Abstract] OR repeatab\* [Title/Abstract] OR ((replicab\* [Title/Abstract] OR repeated [Title/Abstract]) AND (measure [Title/Abstract] OR measures [Title/Abstract] OR findings [Title/Abstract] OR result [Title/Abstract] OR results [Title/Abstract] OR test [Title/Abstract] OR tests [Title/Abstract])) OR generaliza\* [Title/Abstract] OR generalisa\* [Title/Abstract] OR concordance [Title/Abstract] OR (intraclass [Title/Abstract] AND correlation\* [Title/Abstract]) OR discriminative [Title/Abstract] OR "known group" [Title/Abstract] OR factor analysis [Title/Abstract] OR factor analyses [Title/Abstract] OR dimension\* [Title/Abstract] OR subscale\* [Title/Abstract] OR (multitrait [Title/Abstract] AND scaling [Title/Abstract] AND (analysis [Title/Abstract] OR analyses [Title/Abstract])) OR item discriminant [Title/Abstract] OR interscale correlation\* [Title/Abstract] OR error [Title/Abstract] OR errors [Title/Abstract] OR "individual variability" [Title/Abstract] OR (variability [Title/Abstract] AND (analysis [Title/Abstract] OR values [Title/Abstract])) OR (uncertainty [Title/Abstract] AND (measurement [Title/Abstract] OR measuring [Title/Abstract])) OR "standard error of measurement" [Title/Abstract] OR sensitiv\* [Title/Abstract] OR responsive\* [Title/Abstract] OR ((minimal [Title/Abstract] OR minimally [Title/Abstract] OR clinical [Title/Abstract] OR clinically [Title/Abstract]) AND (important [Title/Abstract] OR significant [Title/Abstract] OR detectable [Title/Abstract])) AND (change [Title/Abstract] OR difference [Title/Abstract]) OR (small\* [Title/Abstract] AND (real [Title/Abstract] OR detectable [Title/Abstract])) AND (change [Title/Abstract] OR difference [Title/Abstract]) OR meaningful change [Title/Abstract] OR "ceiling effect" [Title/Abstract] OR "floor effect" [Title/Abstract] OR "Item response model" [Title/Abstract] OR IRT [Title/Abstract] OR Rasch [Title/Abstract] OR "Differential item functioning" [Title/Abstract] OR DIF [Title/Abstract] OR "computer adaptive testing" [Title/Abstract] OR "item bank" [Title/Abstract] OR "cross-cultural equivalence" [Title/Abstract])

#### ***Exclusion Search Filter***

("address\*" [Publication Type] OR "biography" [Publication Type] OR "case reports" [Publication Type] OR "comment" [Publication Type] OR "directory" [Publication Type] OR "editorial" [Publication Type] OR "festschrift" [Publication Type] OR "interview" [Publication Type] OR "lecture\*" [Publication Type] OR "legal



1 case\*"[Publication Type] OR "legislation"[Publication Type] OR "letter"[Publication Type] OR  
2 "news"[Publication Type] OR "newspaper article"[Publication Type] OR "patient education handout"[Publication  
3 Type] OR "popular work\*"[Publication Type] OR "congress\*" [Publication Type] OR "consensus development  
4 conference"[ Publication Type] OR "consensus development conference, nih"[Publication Type] OR "practice  
5 guideline"[ Publication Type]) NOT ("animals"[MeSH Terms] NOT "humans"[MeSH Terms])  
6  
7  
8  
9  
10  
11  
12  
13  
14  
15  
16  
17  
18  
19  
20  
21  
22  
23  
24  
25  
26  
27  
28  
29  
30  
31  
32  
33  
34  
35  
36  
37  
38  
39  
40  
41  
42  
43  
44  
45  
46  
47  
48  
49  
50  
51  
52  
53  
54  
55  
56  
57  
58  
59  
60

For peer review only

**PRISMA-P (Preferred Reporting Items for Systematic review and Meta-Analysis Protocols) 2015 checklist: recommended items to address in a systematic review protocol\***

Title: **Measurement properties of mental health literacy scale (MHLS) validation studies: a systematic review protocol**

| Section and topic                 | Item No | Checklist item                                                                                                                                                                                                                | Reported on Page number |
|-----------------------------------|---------|-------------------------------------------------------------------------------------------------------------------------------------------------------------------------------------------------------------------------------|-------------------------|
| <b>ADMINISTRATIVE INFORMATION</b> |         |                                                                                                                                                                                                                               |                         |
| Title:                            |         |                                                                                                                                                                                                                               |                         |
| Identification                    | 1a      | Identify the report as a protocol of a systematic review                                                                                                                                                                      | Page 1                  |
| Update                            | 1b      | If the protocol is for an update of a previous systematic review, identify as such                                                                                                                                            | NA                      |
| Registration                      | 2       | If registered, provide the name of the registry (such as PROSPERO) and registration number                                                                                                                                    | Page 1 & 4              |
| Authors:                          |         |                                                                                                                                                                                                                               |                         |
| Contact                           | 3a      | Provide name, institutional affiliation, e-mail address of all protocol authors; provide physical mailing address of corresponding author                                                                                     | Page 1 & 10             |
| Contributions                     | 3b      | Describe contributions of protocol authors and identify the guarantor of the review                                                                                                                                           | Page 10                 |
| Amendments                        | 4       | If the protocol represents an amendment of a previously completed or published protocol, identify as such and list changes; otherwise, state plan for documenting important protocol amendments                               | NA                      |
| Support:                          |         |                                                                                                                                                                                                                               |                         |
| Sources                           | 5a      | Indicate sources of financial or other support for the review                                                                                                                                                                 | Page 10                 |
| Sponsor                           | 5b      | Provide name for the review funder and/or sponsor                                                                                                                                                                             | Page 10                 |
| Role of sponsor or funder         | 5c      | Describe roles of funder(s), sponsor(s), and/or institution(s), if any, in developing the protocol                                                                                                                            | Page 10                 |
| <b>INTRODUCTION</b>               |         |                                                                                                                                                                                                                               |                         |
| Rationale                         | 6       | Describe the rationale for the review in the context of what is already known                                                                                                                                                 | Page 3                  |
| Objectives                        | 7       | Provide an explicit statement of the question(s) the review will address with reference to participants, interventions, comparators, and outcomes (PICO)                                                                      | Page 3                  |
| <b>METHODS</b>                    |         |                                                                                                                                                                                                                               |                         |
| Eligibility criteria              | 8       | Specify the study characteristics (such as PICO, study design, setting, time frame) and report characteristics (such as years considered, language, publication status) to be used as criteria for eligibility for the review | Page 5                  |
| Information sources               | 9       | Describe all intended information sources (such as electronic databases, contact with study authors, trial registers or other grey literature sources) with planned dates of coverage                                         | Page 4                  |
| Search strategy                   | 10      | Present draft of search strategy to be used for at least one electronic database, including planned limits, such that it could be repeated                                                                                    | Supplement 1            |
| Study records:                    |         | For peer review only - <a href="http://bmjopen.bmj.com/site/about/guidelines.xhtml">http://bmjopen.bmj.com/site/about/guidelines.xhtml</a>                                                                                    |                         |
| Data management                   | 11a     | Describe the mechanism(s) that will be used to manage records and data throughout the review                                                                                                                                  | Page 5                  |

|                                    |     |                                                                                                                                                                                                                                                  |          |
|------------------------------------|-----|--------------------------------------------------------------------------------------------------------------------------------------------------------------------------------------------------------------------------------------------------|----------|
| Selection process                  | 11b | State the process that will be used for selecting studies (such as two independent reviewers) through each phase of the review (that is, screening, eligibility and inclusion in meta-analysis)                                                  | Page 5   |
| Data collection process            | 11c | Describe planned method of extracting data from reports (such as piloting forms, done independently, in duplicate), any processes for obtaining and confirming data from investigators                                                           | Page 6   |
| Data items                         | 12  | List and define all variables for which data will be sought (such as PICO items, funding sources), any pre-planned data assumptions and simplifications                                                                                          | Page 6   |
| Outcomes and prioritization        | 13  | List and define all outcomes for which data will be sought, including prioritization of main and additional outcomes, with rationale                                                                                                             | Page 7   |
| Risk of bias in individual studies | 14  | Describe anticipated methods for assessing risk of bias of individual studies, including whether this will be done at the outcome or study level, or both; state how this information will be used in data synthesis                             | Page 6-7 |
| Data synthesis                     | 15a | Describe criteria under which study data will be quantitatively synthesised                                                                                                                                                                      | Page 8   |
|                                    | 15b | If data are appropriate for quantitative synthesis, describe planned summary measures, methods of handling data and methods of combining data from studies, including any planned exploration of consistency (such as $I^2$ , Kendall's $\tau$ ) | Page 8   |
|                                    | 15c | Describe any proposed additional analyses (such as sensitivity or subgroup analyses, meta-regression)                                                                                                                                            | NA       |
|                                    | 15d | If quantitative synthesis is not appropriate, describe the type of summary planned                                                                                                                                                               | Page 8   |
| Meta-bias(es)                      | 16  | Specify any planned assessment of meta-bias(es) (such as publication bias across studies, selective reporting within studies)                                                                                                                    | Page 9   |
| Confidence in cumulative evidence  | 17  | Describe how the strength of the body of evidence will be assessed (such as GRADE)                                                                                                                                                               | Page 9   |

**\* It is strongly recommended that this checklist be read in conjunction with the PRISMA-P Explanation and Elaboration (cite when available) for important clarification on the items. Amendments to a review protocol should be tracked and dated. The copyright for PRISMA-P (including checklist) is held by the PRISMA-P Group and is distributed under a Creative Commons Attribution Licence 4.0.**

*From: Shamseer L, Moher D, Clarke M, Ghersi D, Liberati A, Petticrew M, Shekelle P, Stewart L, PRISMA-P Group. Preferred reporting items for systematic review and meta-analysis protocols (PRISMA-P) 2015: elaboration and explanation. BMJ. 2015 Jan 2;349(jan02 1):g7647.*

# BMJ Open

## Measurement properties of the Mental Health Literacy Scale (MHLS) validation studies: a systematic review protocol

|                                 |                                                                                                                                                                                                                                                                                                                                                                                                                                                                                                                                                                                                                                                                                                                                                                                                                                       |
|---------------------------------|---------------------------------------------------------------------------------------------------------------------------------------------------------------------------------------------------------------------------------------------------------------------------------------------------------------------------------------------------------------------------------------------------------------------------------------------------------------------------------------------------------------------------------------------------------------------------------------------------------------------------------------------------------------------------------------------------------------------------------------------------------------------------------------------------------------------------------------|
| Journal:                        | <i>BMJ Open</i>                                                                                                                                                                                                                                                                                                                                                                                                                                                                                                                                                                                                                                                                                                                                                                                                                       |
| Manuscript ID                   | bmjopen-2023-081394.R1                                                                                                                                                                                                                                                                                                                                                                                                                                                                                                                                                                                                                                                                                                                                                                                                                |
| Article Type:                   | Protocol                                                                                                                                                                                                                                                                                                                                                                                                                                                                                                                                                                                                                                                                                                                                                                                                                              |
| Date Submitted by the Author:   | 14-Feb-2024                                                                                                                                                                                                                                                                                                                                                                                                                                                                                                                                                                                                                                                                                                                                                                                                                           |
| Complete List of Authors:       | ElKhalil, Rouwida; United Arab Emirates University, Public Health Institute<br>AlMekawi, Mohamad; Fatima College of Health Sciences, Nursing Department<br>O'Connor, Matt; ConnectEd Counselling and Consultancy<br>Sherif, Moustafa; United Arab Emirates University, Public Health Institute<br>Masuadi, Emad; United Arab Emirates University, Public Health Institute<br>Ahmed, Luai; United Arab Emirates University College of Medicine and Health Sciences, Institute of Public Health<br>Al-Rifai, Rami H.; United Arab Emirates University, Institute of Public Health, College of Medicine and Health Sciences<br>Belfakir, Messaouda; United Arab Emirates University, Public Health Institute<br>Bayoumi, Rasha; University of Birmingham Dubai, School of Psychology<br>Elbarazi, Iffat; United Arab Emirates University |
| <b>Primary Subject Heading</b>: | Mental health                                                                                                                                                                                                                                                                                                                                                                                                                                                                                                                                                                                                                                                                                                                                                                                                                         |
| Secondary Subject Heading:      | Public health                                                                                                                                                                                                                                                                                                                                                                                                                                                                                                                                                                                                                                                                                                                                                                                                                         |
| Keywords:                       | MENTAL HEALTH, Patient Reported Outcome Measures, Psychometrics, Systematic Review, Health Literacy                                                                                                                                                                                                                                                                                                                                                                                                                                                                                                                                                                                                                                                                                                                                   |
|                                 |                                                                                                                                                                                                                                                                                                                                                                                                                                                                                                                                                                                                                                                                                                                                                                                                                                       |

SCHOLARONE™  
Manuscripts

1  
2 1 **Measurement properties of the Mental Health Literacy Scale (MHLS) validation studies: a**  
3 2 **systematic review protocol**

---

4 3  
5 4 Rouwida ElKhalil <sup>1</sup>, Mohamad AlMekawi <sup>2</sup>, Matt O'Connor <sup>3</sup>, Moustafa Sherif <sup>1</sup>, Emad Masuadi <sup>1</sup>, Lui  
6 5 A. Ahmed <sup>1</sup>, Rami H. AlRifai <sup>1</sup>, Messaouda Belfakir <sup>1</sup>, Rasha Bayoumi <sup>4</sup>, Iffat Elbarazi <sup>1\*</sup>  
7 6

8 7 *\*Corresponding Author:* Iffat Elbarazi, email [ielbarazi@uaeu.ac.ae](mailto:ielbarazi@uaeu.ac.ae), PO Box 15551, office +97137137643,  
9 8 mobile +971585939520, *Institute of Public Health, College of Medicine and Health Sciences (CMHS),*  
10 9 *United Arab Emirates University, Al Ain, United Arab Emirates.*  
11

12 10  
13 11  
14 12 <sup>1</sup> Institute of Public Health, United Arab Emirates University, Al Ain, United Arab Emirates.

15 13 <sup>2</sup> Nursing Department, Fatima College of Health Sciences, Al Ain, United Arab Emirates.

16 14 <sup>3</sup> ConnectEd Counselling and Consultancy, Queensland, Australia.

17 15 <sup>4</sup> School of Psychology, Birmingham University, Dubai, United Arab Emirates.  
18 16

19 17 **Word count: 3002**

20  
21 18 **Keywords:** Cross-Cultural adaptation; Instrument validation; Measurement properties; Psychometric  
22 19 analysis; Translation.  
23  
24 20  
25 21  
26 22  
27 23  
28 24  
29 25  
30 26  
31 27  
32 28  
33 29  
34 30  
35 31  
36 32  
37 33  
38 34  
39 35  
40 36  
41 37  
42 38  
43 39  
44 40  
45 41  
46 42  
47 43  
48 44  
49 45  
50 46  
51 47  
52 48  
53 49  
54 50  
55 50  
56  
57  
58  
59  
60

## ABSTRACT

**Introduction:** Mental Health Literacy (MHL) is important for improving mental health and reducing inequities in treatment. The Mental Health Literacy Scale (MHLS) is a valid and reliable assessment tool for MHL. This systematic review will examine and compare the measurement properties of the MHLS in different languages, enabling academics, clinicians, and policymakers to make informed judgments regarding its use in assessments.

**Methods and analysis:** The review will adhere to the COSMIN methodology for systematic reviews of patient-reported outcome measures (PROMs) and the JBI Manual for Evidence Synthesis and will be presented following the PRISMA 2020 Checklist. The review will be conducted in four stages, including an initial search confined to PubMed, a search of electronic scientific databases PsycINFO, CINAHL, Scopus, MEDLINE, Embase (Elsevier), PubMed (NLM), and ERIC, an examination of the reference lists of all papers to locate relevant publications, and finally contacting the MHLS original author to identify validation studies that the searches will not retrieve. These phases will assist us in locating papers that evaluate the measurement properties of MHLS across various populations, demographics, and contexts. The search will focus on articles published in English between May 2015 and December 2023. The methodological quality of the studies will be evaluated using the COSMIN Risk of Bias (ROB) checklist, and a comprehensive qualitative and quantitative data synthesis will be performed.

**Ethics and dissemination:** Ethics approval is not required. The publication will be in peer-reviewed journals and presented at national and international conferences.

**PROSPERO registration number:** CRD42023430924.

## Article Summary

### Strengths and Limitations of This Study

- This review evaluates MHLS measurement properties across languages, stressing diverse MHL assessments.
- It adheres to the JBI Manual and COSMIN methodology and follows PRISMA 2020 guidelines.
- Limited by a temporal gap post-2018 due to MHLS development in 2015.
- Exclusion of non-English papers
- Challenges in meta-analyses are anticipated, given study heterogeneity.

## 96 INTRODUCTION

97 Mental health is an integral part of overall health and well-being. Global rates of mental disorders are  
98 significant, with depression alone affecting over 280 million people(1). Personal Health literacy (HL) is  
99 defined as “the degree to which individuals have the ability to find, understand, and use information and  
100 services to inform health-related decisions and actions for themselves and others” (2). Mental health literacy  
101 (MHL), a derivative from and component of Health Literacy (3), is defined as the "knowledge and beliefs  
102 about mental disorders which aid their recognition, management or prevention" (4). Jorm elaborated on the  
103 original definition of MHL to encompass the following: understanding ways to prevent mental illness,  
104 recognizing early signs and symptoms of mental illness, being aware of various help-seeking choices and  
105 treatments, awareness regarding methods of self-help, and mental health first aid skills to help and support  
106 people who have mental illness (5). Accordingly, MHL consists of the following attributes: the ability to  
107 identify specific disorders, knowledge of how to obtain mental health information, knowledge of risk  
108 factors and causes, self-care methods, and available professional assistance, and attitudes that encourage  
109 recognition and proper seeking of support (4). Research regarding MHL has covered a wide range of topics,  
110 including stigma, help-seeking behaviors, and the mental health difficulties experienced by different  
111 vulnerable groups (6). Therefore, MHL plays a crucial role in enhancing individuals' mental well-being by  
112 helping them identify their symptoms, find available resources, and obtain the necessary support (7,8).

113 Using validated instruments to assess MHL is vital for developing successful strategies to promote  
114 mental health. These instruments can also assist academics and policymakers in identifying knowledge gaps  
115 in MHL and designing culturally appropriate solutions tailored to various individual and community needs  
116 (9). Developing a MHL instrument requires having a clear operational definition of the construct (3,10).  
117 Historically, this construct has been evaluated using two approaches, namely the Vignette Approach and  
118 the Scale-based Measurements (11). The Vignette Approach is described as “stories about individuals and  
119 situations which refer to important points in the study of perceptions, beliefs, and attitudes” (12). This  
120 approach has limitations, such as the inability to compare items within the scale, understand the differences  
121 between MHL components, and track improvement over time. Scale-based Measurements, also called  
122 patient-reported outcome measures (PROMs), are “measurement instruments that patients complete to  
123 provide information on aspects of their health status that are relevant to their quality of life, including  
124 symptoms, functionality, and physical, mental and social health.” (13).

125 Following a systematic assessment of MHL instruments in 2014, O'Connor and Casey designed the  
126 MHLScale (MHLS) to address these limitations and to produce a valid and reliable assessment tool for  
127 MHL (11). The rigor with which the MHLS was developed and its subsequent psychometric properties  
128 have made it the most reliable and validated instrument for assessing MHL (14). The scale showed adequate  
129 content and structural validity, good test-retest reliability, and internal consistency ( $\alpha=0.873$ ) (11). In  
130 addition, the MHLS is the only available instrument to measure all aspects of MHL (15).

1  
2 131 The MHLS is a unidimensional measurement scale with 35 items and six attributes based on Jorm's six  
3 132 MHL attributes (4). The scale items were generated using a combination of adaption of existing MHL items,  
4  
5 133 descriptors from the Diagnostic and Statistical Manual of Mental Disorders DSM-IV-TR21, national and  
6  
7 134 international data, and the clinical experience of the authors and their clinical panel who advised the item  
8  
9 135 generation. The scale score ranges from 35 to 160, with a higher score implying a higher level of MHL.  
10  
11 136 The scale has the following sections: Recognition of Disorders (eight items measured on a four-point Likert  
12  
13 137 scale), Knowledge of Risk Factors and Causes (two items measured on a four-point Likert scale), Self-  
14  
15 138 Treatment Knowledge (two items measured on a four-point Likert scale), Knowledge of Professional Help  
16  
17 139 Available (three items measured on a four-point Likert scale), Knowledge of How to Seek Mental Health  
18  
19 140 Information (four items measured on a five Likert-scale), and Attitudes that Promote Recognition and  
20  
21 141 Appropriate Help-Seeking (16 items measured on a five-point Likert scale), with items 10, 12, 15, and 20–  
22  
23 142 28 as reverse-scored items (11).

24  
25 143 The scale has been used in various cultural and language contexts, making it a valuable instrument for  
26  
27 144 cross-cultural research studies (16). Modification and cultural adaptation of research instruments have  
28  
29 145 numerous advantages over creating new ones. It permits comparisons of research outcomes from different  
30  
31 146 cultures, facilitating international scientific collaboration and reducing costs and time (17,18). According  
32  
33 147 to Arafat et al.(17), cross-cultural validation involves translation, adaption, measurement of reliability  
34  
35 148 (repeatability and internal consistency), evaluation of validity (content validity, face validity, construct  
36  
37 149 validity, and criterion validity), and responsiveness.

38  
39 150 Nevertheless, this study aims to critically examine, summarize, and compare the measurement  
40  
41 151 properties of all language versions of the MHLS by systematically examining the methodological quality  
42  
43 152 and findings of the available publications. While the MHLS has been culturally adapted and translated into  
44  
45 153 numerous languages, comprehensive reviews of the adapted versions are lacking, leaving minimal evidence  
46  
47 154 regarding their measurement properties (16,19). This systematic review is important to researchers aiming  
48  
49 155 to measure MHL in diverse settings as it evaluates and compares the measurement properties of all language  
50  
51 156 versions of the MHLS. The objective is to provide new insights into the measurement properties of the  
52  
53 157 MHLS across different language versions. The findings of this review will be valuable for academics,  
54  
55 158 clinicians, and policymakers to enhance their understanding of the MHLS's reliability and validity in  
56  
57 159 various cultural and language contexts. Furthermore, this review will contribute to the theoretical  
58  
59 160 framework surrounding MHLS validation, guide future research initiatives, and facilitate collaborations  
60  
61 161 with researchers and publications in the field of MHLS validation.

62 The objectives of this study are:

- 63 1. To summarize the utilized adaptation /validation processes employed in MHLS validation studies,
- 64 2. To assess the methodological quality of studies
- 65 3. To evaluate the measurement properties of the MHLS across several language versions,



- 1  
2 166 4. To compare and synthesize the findings of studies that examined the measurement properties of the  
3 167 MHLS in different language versions, such as its reliability, validity, and responsiveness, by  
4 168 qualitatively summarizing or quantitatively pooling the results.

5  
6 169  
7 170 **METHODS**

9 171 This systematic review will be conducted between September 2023 and December 2023. This protocol  
10 172 adheres to items outlined under the Preferred Reporting Items for Systematic Reviews and Meta-Analysis  
11 173 (PRISMA) Protocol (20). The proposed systematic review will adhere to the Joanna Briggs Institute  
12 174 (JBI)Manual for Evidence Synthesis (Chapter 12: Systematic Reviews of Measurement Properties) (21)  
13 175 and the COSMIN methodology for systematic reviews of Patient-Reported Outcome Measures (PROMs)  
14 176 (22). The results will be presented according to Preferred Reporting Items for Systematic Reviews and  
15 177 Meta-Analyses (PRISMA 2020)(23). The systematic review methodology is summarized in Figure 1. The  
16 178 study is registered at PROSPERO under the ID number CRD42023430924.

17  
18  
19  
20  
21  
22 179

23  
24 180 *Insert Figure 1.*

25  
26 181

27 182 **Patient and Public Involvement**

28  
29 183 None

30  
31 184

32 185 **Search strategy**

33  
34 186 The review will begin with forming a research team of individuals with content and methodological  
35 187 competencies (24). The team will advise on the overarching research question and the entire study protocol,  
36 188 including identifying the search terms and databases. The review will be conducted in four stages per the  
37 189 JBI Standards (21).

40 190 In the first stage, an initial search of the PubMed database will be done using a sensitive search filter  
41 191 (25) to find studies on the measurement properties of MHLS (see Supplementary 1). The initial search will  
42 192 follow '*Filter 1: Sensitive search filter for measurement properties*', which guarantees 97.4% sensitive and  
43 193 4.4% precise results (Table 1). In the second stage, we will search the electronic scientific databases  
44 194 PsycINFO, CINAHL, Scopus, MEDLINE, Embase (Elsevier), PubMed (NLM), and ERIC using the final  
45 195 Boolean expression created in the previous phase (see Supplementary 2). In the third stage, the reference  
46 196 lists of all papers included in the second stage will be examined, and more relevant publications will be  
47 197 located and incorporated into this study. In the final stage, the MHLS creator will be contacted to identify  
48 198 validation studies not retrieved in the previous searches.

We have already identified the search filters (see Supplementary 1). These were combined with phrases searched for the concept of interest (Mental Health Literacy) "AND" the measuring instrument of interest (MHLScale). However, no population search was added because there were no population type, age, or setting restrictions. These searches were paired with the measurement properties search filter to locate all studies on the MHLS measurement properties that assess MHL in all populations. For a more thorough search, we used the sensitive filter. The exclusion filter was used to eliminate records from the search, such as case studies and animal studies.

**Table 1**  
Systematic review search strategy. *Adopted from Terwee et al. (25)*

| Search Strategy |                                                                                  |
|-----------------|----------------------------------------------------------------------------------|
| #1              | Construct Search (Mental Health Literacy)                                        |
| #2              | Instrument Search (MHLScale)                                                     |
| #3              | #1 AND #2 AND Sensitive filter for measurement properties (See Supplementary 1A) |
| #4              | #3 NOT exclusion search filter (See Supplementary 1B)                            |

**Study screening and selection**

The screening and selection approach will be summarized using the Preferred Reported Items in Systematic Reviews and Meta-analysis (PRISMA) flowchart (23). Our review question and inclusion criteria are framed using the PICO (Population, Instruments, Construct, Outcomes) method (21). Eligibility criteria, as shown in Table 2, are as follows: (1) *Participants*: The review will consider studies that validate the MHLS in any population (e.g., community representation, students, perinatal patients, or health professionals) without restricting participants' age group; *Context*: The review will consider all primary research that validated the MHLS in all global settings (i.e., as acute care, primary health care, or the community); (2) *Instrument and Construct*: The review will focus solely on O'Connor and Casey MHLS (11); (3) *Outcomes*: Measurement properties (reliability, validity, and responsiveness) of adapted MHLS will be assessed and reported based on the individual study as in Table 3(21); (4) *Types of Sources*: The review will consider primarily published designs empirically validating the MHLS, including translation and cultural adaptation, reliability, and validity testing using various statistical analyses (17). The aim of the included studies should be the evaluation of one or more measurement properties (22). This review will exclude studies that only use the MHLS as an outcome measure; (5) *Language*: Only English papers published will be eligible for review. Non-English publications will be excluded during the screening phase; (6) *Date*: Since the MHLS was created in 2015, only studies published between 2015 and 2022 will be considered.

The retrieved literature will be imported into Covidence. The publications will be screened in two steps: The title and abstract will be reviewed, and then the full text will be examined. Two reviewers (RE and ME) will independently examine retrieved abstracts using this review's previously specified eligibility criteria. The author of MHLS will be contacted to identify additional studies, and citations will be searched

232 for additional articles. Covidence will be used to identify and delete the duplicates. The two reviewers will  
 233 meet at the beginning, midpoint, and end of the abstract review process to discuss concerns and uncertainties  
 234 relating to study selection and, if necessary, alter the search approach. Another two researchers (RE and  
 235 MB) will independently review the full manuscripts. A third reviewer (IE) will make the final judgment  
 236 when there is disagreement over research inclusion. With IE and MA having been experienced professionals  
 237 and scholars in the field of public health and RE and MB being doctoral candidates in public health, this  
 238 group is an optimal team to select and review articles for this study. EM will provide methodological  
 239 guidance to the research team. The systematic review will document and report the reasons for excluding  
 240 full-text papers that do not match the inclusion criteria. Finally, reviewed articles will be retained for  
 241 synthesis.

242  
 243 **Table 2**  
 244 Systematic review inclusion and exclusion criteria.

| Inclusion Criteria                                                                                   | Exclusion Criteria                                                              |
|------------------------------------------------------------------------------------------------------|---------------------------------------------------------------------------------|
| 1. Participants: Any population or age group<br>Context: All settings in any country.                | 1. Non-English studies                                                          |
| 2. Instrument and Construct: MHLScale (MHLS),<br>O'Conner and Casey 2015 assess the<br>MHLconstruct. | 2. Grey literature (non-peer-reviewed<br>publications or documents of any type) |
| 3. Outcomes: Reliability, validity, and<br>responsiveness.                                           | 3. Other MHLmeasures                                                            |
| 4. Types of sources: Validation studies                                                              | 4. Studies that only use the MHLS as an<br>outcome measure.                     |
| 5. Language: English                                                                                 |                                                                                 |
| 6. Date: 2015 to 2022                                                                                |                                                                                 |

245  
 246 **Table 3**  
 247 Systematic review outcomes: measurement properties. *Adopted from Stephenson et al.(21)*

| Main Outcomes                  | Effect Measures                                                                                                                                                                                                                                                                                                                          |
|--------------------------------|------------------------------------------------------------------------------------------------------------------------------------------------------------------------------------------------------------------------------------------------------------------------------------------------------------------------------------------|
| <b>1. Reliability</b>          | Cronbach's alpha coefficients, <i>or</i> intra-class correlation coefficients (ICC), <i>or</i> weighted or un-weighted Kappa, <i>or</i> standard error of measurement (SEM), <i>or</i> limits of agreement (LoA), <i>or</i> smallest detectable change (SDC), <i>or</i> concordance correlation coefficients goodness of fit statistics. |
| <b>2. Validity</b>             |                                                                                                                                                                                                                                                                                                                                          |
| <i>i. Content validity</i>     | Purpose, target population, the comprehensiveness of the instrument, floor or ceiling effects (if available), <i>and</i> relevant items for the construct [Content Validity Index( CVI), <i>or</i> Index of Item Objective Congruence (IOC)].                                                                                            |
| <i>ii. Structural validity</i> | Factor analysis and Comparative Fit Index (CFI), <i>and</i> Tucker-Lewis Index (TLI), <i>and</i> Root Mean Square Error of Approximation (RMSEA), <i>and</i> Standardized Root Mean Residuals (SRMR).                                                                                                                                    |

- 1  
2  
3  
4  
5  
6  
7  
8  
9  
10  
11  
12  
13
- |                                    |                                                                                                                                                                                                |
|------------------------------------|------------------------------------------------------------------------------------------------------------------------------------------------------------------------------------------------|
| iii. <i>Hypothesis testing</i>     | Absolute or relative differences or correlations between MHLS with other instruments, <i>or</i> Absolute or relative differences or correlations between MHLS with two groups of participants. |
| iv. <i>Cross-cultural validity</i> | The Differential Item Functioning (DIF).                                                                                                                                                       |
| v. <i>Criterion validity</i>       | Correlations, <i>or</i> Areas under Receiver Operating Curves (ROC), <i>or</i> Sensitivity and Specificity.                                                                                    |
| <b>3. Responsiveness</b>           | Absolute or relative correlations, <i>or</i> Differences of the change scores, <i>or</i> The Areas under Receiver Operating Curves (ROC), <i>or</i> Sensitivity and specificity.               |
- 

248

## 249 **Data charting**

250 Using the Microsoft Excel 365<sup>®</sup> spreadsheet template that the reviewers adapted from the COSMIN website  
 251 (26), two independent reviewers will perform the data extraction and the methodological quality assessment  
 252 of full-text articles that meet the inclusion criteria. Before beginning the review, we will conduct calibration  
 253 exercises, such as piloting the forms on two studies, to ensure consistency among reviewers (26). The data  
 254 charting instruments (See Supplementary 4) were adapted from the COSMIN methodology for systematic  
 255 reviews of the user manual (PROMs) (22). Disagreements between the reviewers will be handled through  
 256 discussion or with the assistance of a third reviewer. We will contact the authors of the study to resolve any  
 257 uncertainties. The three focus areas, namely, the validation/adaptation process, risk of bias assessment, and  
 258 measurement properties evaluation, will guide our data "charting." We will chart data by publication year,  
 259 instrument administration (country, target language, setting), included sample characteristics [population  
 260 group, age mean (SD), gender (% female), sample size and calculation], number of missing data, response  
 261 rates, interpretability [Distribution (Skewness and/or Kurtosis), Percentage of missing items, Percentage of  
 262 missing total scores, Floor and ceiling effects], feasibility (Completion time, Patient's comprehensibility,  
 263 and type and ease of administration), MHLS score, and reported MHLS item modifications.

264

## 265 **Assessment of risk of bias**

266 We will determine the quality of the measurement properties by using the COSMIN Risk of Bias (RoB)  
 267 checklist, which will be filled out to evaluate the methodological quality of each study or the risk of bias in  
 268 the study's findings. The following nine boxes from the checklist will be used: -PROM development,  
 269 Content validity, Structural validity, Internal consistency, Cross-cultural validity/Measurement invariance,  
 270 Reliability, Measurement error, Criterion validity, Hypothesis testing for construct validity, and  
 271 Responsiveness. Only the boxes for the measurement properties reviewed in the article will be evaluated  
 272 using the RoB, which should be used as a modular tool (27). Quality rating options for Items under each  
 273 box are 'very good,' 'adequate,' 'doubtful,' 'inadequate,' or 'Not Applicable.' To establish the overall quality  
 274 of a study, the lowest rating of any standard in the box will be used (i.e., "the worst score counts" principle).

275 For example, if one item in a box is scored as 'inadequate' for a reliability study, the total methodological  
 276 quality of that reliability research is graded as 'inadequate.' The translation process methodological quality  
 277 will be determined by using the COSMIN Study Design checklist that provides standards for translating an  
 278 existing PROM in the box Translation process (28).

279

### 280 **Evaluation of measurement properties**

281 The results of measurement properties will be rated based on the criteria presented in Table 4. Ratings will  
 282 vary from positive (+), negative (-), and indeterminate ratings (?) according to individual study  
 283 measurement property results(22). As mentioned, the content validity rating criteria results were based on  
 284 the COSMIN methodology guidelines for assessing the PROMs User Manual 22 content validity (29).  
 285 Specific MHLS hypotheses for 'Hypothesis Testing for Construct Validity' and 'Responsiveness' were  
 286 developed (Supplementary Appendix 3).

287

### 288 **Data synthesis and levels of evidence**

289 The results will either be quantitatively or qualitatively combined. We will present these pooled or  
 290 summarized results per measurement property (See Supplementary 4C), together with a grade for the  
 291 quality of the evidence (high, moderate, low, or extremely low) and a rating of the pooled or summarized  
 292 results (+ /- /?).

293

### 294 **Table 4**

295 Quality criteria for measurement properties. *Adapted from Hair et al., Prinsen et al., and Terwee et al.*  
 296 (22,29,30)

| Property             | Rating <sup>b</sup> | Quality criteria                                                                                                                     |
|----------------------|---------------------|--------------------------------------------------------------------------------------------------------------------------------------|
| <b>Reliability</b>   |                     |                                                                                                                                      |
| Internal Consistency | +                   | Cronbach alphas $\geq .70$                                                                                                           |
|                      | ?                   | Cronbach alpha not determined.                                                                                                       |
|                      | -                   | Cronbach alphas $< .70$                                                                                                              |
| Reliability          | +                   | ICC/weighted kappa $\geq .70$ OR Pearson $r \geq .80$                                                                                |
|                      | ?                   | Neither ICC/weighted kappa nor Pearson r determined                                                                                  |
|                      | -                   | ICC/weighted kappa $.70$ OR Pearson $r .80$                                                                                          |
| Measurement Error    | +                   | MIC $>$ SDC OR MIC outside the LOA                                                                                                   |
|                      | ?                   | MIC not defined                                                                                                                      |
|                      | -                   | MIC $\leq$ SDC OR MIC equals or inside LOA                                                                                           |
| <b>Validity</b>      |                     |                                                                                                                                      |
| Structural validity  | +                   | <b>CTT:</b>                                                                                                                          |
|                      |                     | CFA: CFI or TLI or comparable measure $> 0.95$ OR RMSEA $< 0.08$                                                                     |
|                      |                     | EFA: Factors should explain at least 60% of the variance                                                                             |
|                      |                     | <b>IRT/Rasch:</b>                                                                                                                    |
|                      |                     | No violation of unidimensionality <sup>3</sup> : CFI or TLI or comparable measure $> 0.95$ OR RMSEA $< 0.20$ OR Q3's $< 0.37$<br>AND |

|    |                        |   |                                                                                 |
|----|------------------------|---|---------------------------------------------------------------------------------|
| 1  |                        |   | no violation of monotonicity: adequate looking graphs OR item                   |
| 2  |                        |   | scalability >0.30                                                               |
| 3  |                        |   | AND                                                                             |
| 4  |                        |   | adequate model fit: IRT: $\chi^2 > 0.01$ Rasch: infit and outfit mean           |
| 5  |                        |   | squares $\geq 0.5$ and $\leq 1.5$ OR Z- standardized values $> -2$ and $< 2$    |
| 6  |                        | ? | <b>CTT:</b> Not all information for '+' reported Or Explained variance          |
| 7  |                        |   | not mentioned                                                                   |
| 8  |                        |   | <b>RT/Rasch:</b> Model fit not reported                                         |
| 9  |                        | - | Criteria for '+' not met OR Factors explain <60% of the variance                |
| 10 |                        | + | The result is in accordance with the hypothesis.                                |
| 11 | Hypotheses testing for | ? | No hypothesis was defined (by the review team)                                  |
| 12 | construct validity     | - | The result is not in accordance with the hypothesis.                            |
| 13 |                        | + | No important differences were found between group factors                       |
| 14 | Cross-cultural         |   | (such as age, gender, language) in multiple group factor analysis               |
| 15 | validity\measurement   |   | OR no important DIF for group factors (McFadden's $R^2 < 0.02$ )                |
| 16 | invariance             | ? | No multiple group factor analysis OR DIF analysis was                           |
| 17 |                        |   | performed.                                                                      |
| 18 |                        | - | Important differences between group factors OR DIF were                         |
| 19 |                        |   | found.                                                                          |
| 20 | Criterion validity     | + | Correlation with gold standard $\geq 0.70$ OR $AUC \geq 0.70$ X                 |
| 21 |                        | ? | Not all information for '+' reported                                            |
| 22 |                        | - | Correlation with gold standard $< 0.70$ OR $AUC < 0.70$                         |
| 23 | Responsiveness         | + | The result is in accordance with the hypothesis <sup>7</sup> OR $AUC \geq 0.70$ |
| 24 |                        | ? | No hypothesis was defined (by the review team)                                  |
| 25 |                        | - | The result is not in accordance with the hypothesis <sup>7</sup> OR $AUC <$     |
| 26 |                        |   | $0.70$                                                                          |
| 27 | Content validity       | + | The Relevance Rating is +, the Comprehensiveness Rating is +,                   |
| 28 |                        | - | and the COMPREHENSIBILITY RATING is +                                           |
| 29 |                        | - | The Relevance Rating is -, the Comprehensiveness Rating is -,                   |
| 30 |                        |   | and the Comprehensibility Rating is -                                           |
| 31 |                        | ± | At least one of the ratings is +, and at least one of the ratings is -          |
| 32 |                        | ? | Two or more of the ratings are rated?                                           |

297 <sup>a</sup> MIC=minimal important change, SDC=smallest detectable change, LOA=limits of agreement, ICC=intraclass  
 298 correlation coefficient, DIF=differential item functioning, AUC=area under the curve.

299 <sup>b</sup> +=positive rating, ?=indeterminate rating, -= negative rating, ±= mixed ratings (content validity only)

300

### 301 Quantitative pooling of the results

302 In case of availability of more than two investigations per measurement, property, and language version,  
 303 meta-analyses will be conducted, and the findings will be statistically pooled. Calculating weighted  
 304 averages (depending on the number of participants participating in each research) and 95% confidence  
 305 intervals will yield pooled estimates of measurement properties. For assessing test-retest reliability, one can  
 306 calculate weighted mean intraclass correlation coefficients (ICCs) and 95% confidence intervals using a  
 307 standard generic inverse variance random effects model (31). ICC values can be combined based on  
 308 estimates obtained from a Fisher transformation,  $z = 0.5 \times \ln((1+ICC)/(1-ICC))$ , which has an approximate  
 309 variance of  $(\text{Var}(z) = 1/(N-3))$ , where N is the sample size (32). For evaluating construct validity, we will  
 310 aggregate all correlations between a (PROM) and other PROMs that measure a similar construct.

311 Meanwhile, Cronbach's alpha will be reported as weighted means. To conduct meta-analyses, we will be  
312 consulting a statistician.

### 313 314 **Qualitative summary of the result**

315 If it is impossible to pool the results statistically, the results of each measurement property will be summed  
316 up qualitatively. For example, we will provide the range (lowest and highest) of Cronbach's alpha values  
317 found for internal consistency, the percentage of confirmed hypotheses for construct validity, or the range  
318 of each model fit parameter on a consistently found factor structure in structural validity studies.

### 319 320 **Applying measurement properties criteria to the pooled or summarized results**

321 The pooled or summarized result per measurement property per language version of MHLS will again be  
322 rated using the same quality standards for good measurement properties (Table 4). The overall assessment  
323 of the combined or summed outcome may be positive (+), negative (-), or indeterminate rating (?). The  
324 ratings will be provided in the summary of findings tables (See Supplementary 4B and 4C).

325 Using the GRADE approach, which is a systematic approach to rating the certainty of evidence in  
326 systematic reviews, the following four factors will be considered when evaluating measurement properties  
327 to determine the quality of the evidence in this systematic review (Table 5): (1) risk of bias (i.e., quality of  
328 the studies' methodology), (2) inconsistency (i.e., unexplained, inconsistent results across studies), (3)  
329 imprecision (i.e., the total sample size of the available studies), and (4) indirectness (i.e., evidence from  
330 different populations than the population of interest in the review) (22).

331  
332 **Table 5**  
333 Definitions of quality levels. *Adopted from Prinsen et al. (22)*

| Quality Level   | Definition                                                                                                                                                                                                                        |
|-----------------|-----------------------------------------------------------------------------------------------------------------------------------------------------------------------------------------------------------------------------------|
| <b>High</b>     | We are very confident that the true measurement property lies close to that of the estimate* of the measurement property.                                                                                                         |
| <b>Moderate</b> | We are moderately confident in the measurement property estimate: the true measurement property is likely to be close to the estimate of the measurement property, but there is a possibility that it is substantially different. |
| <b>Low</b>      | Our confidence in the measurement property estimate is limited: the true measurement property may be substantially different from the estimate of the measurement property.                                                       |
| <b>Very low</b> | We have very little confidence in the measurement property estimate: the true measurement property is likely to be substantially different from the estimate of the measurement property.                                         |

\* Estimate of the measurement property refers to the pooled or summarized result of the measurement property of a PROM.

334  
335  
336  
337

## 338 Data presentation

339 The data gathered from the included papers will be presented in a tabular format, with the table reporting  
340 essential findings relevant to the review topic. The tabulated data will accompany a narrative summary  
341 describing how the results relate to the review objective and question.

## 342 343 DISCUSSION

344 MHL is essential for enhancing mental health and decreasing treatment disparities. It helps healthcare  
345 professionals comprehend the educational requirements for mental health among patients and communities.  
346 Additionally, it assists individuals in understanding their symptoms, locating relevant resources, and  
347 receiving appropriate healthcare assistance (8). Improving and maintaining healthcare provision is a  
348 challenge for practitioners and policymakers. Also, patients possess distinct perspectives on healthcare  
349 quality; however, their potential for measuring it remains untapped (13). This systematic review provides  
350 a unique insight into the measurement properties of the MHLS in a cross-cultural context. The review uses  
351 a rigorous approach to summarize the evidence on MHLS reliability and validity and to assess bias and  
352 heterogeneity in the results. It will provide academics, clinicians, and policymakers with needed evidence  
353 to adopt the MHLS in their research or practice based on its reliability and validity levels and will guide  
354 them in selecting the most appropriate version for their specific context. In addition, it will assist in  
355 assessing the consistency of results across different populations, settings, and study designs.

356 Furthermore, the review will provide a robust model and a transparent review of measurement  
357 properties using COSMIN guidelines (21). As such, a notable strength of this review is that it analyses the  
358 measurement properties of all language versions of the MHLS, emphasizing the importance of researchers  
359 measuring MHL in various settings. Additionally, the review will adhere to the JBI Manual for Evidence  
360 Synthesis (Chapter 12: Systematic reviews of measurement properties) (21) and the COSMIN methodology  
361 for systematic reviews of Patient-Reported Outcome Measures (PROMs) user manual (22) and will be  
362 reported according to the Preferred Reporting Items for Systematic Reviews and Meta-Analyses guideline  
363 (PRISMA 2020) (23). However, this systematic review will be limited by the temporal discrepancy between  
364 the MHLScale (MHLS) development in 2015 and the available resources for measuring properties' quality  
365 evaluation, which existed after 2018. In addition, excluding non-English papers due to logistical constraints  
366 could be a limitation. We anticipate that the heterogeneity of the studies will impact the ability to do meta-  
367 analyses.

## 368 Contributions

369 RE, IE, EM, and MA conceived the concept and design of the study. MS and RE collaborated on developing  
370 the search strategy. RE, MA, IE, and MS will complete the literature review. RE and MB EM will perform  
371 data extraction provided their statistical expertise. MO provided expert advice on the MHLS, methodology  
372 plan, and manuscript drafting and editing, but he was not involved in data charting, risk of bias assessment,



1  
2 373 or data synthesis. RA drafted the initial version of this manuscript and will also compose the final systematic  
3 374 review. LA, RA, and RB contributed to the additional text and revisions. MA and IE reviewed and  
4  
5 375 supervised the work on the manuscript. All authors examined and approved the submitted version.

6  
7 376

8 377 **Funding:** The United Arab Emirates University (UAEU) provided publication funds for this article , and  
9  
10 378 the award/grant number is noted as "Not Applicable."

11 379 **Competing interests:** MO is among the MHLS's authors. The authors do not disclose any additional  
12  
13 380 potential conflicts of interest.

14 381 **Patient consent:** Not required

15  
16 382 **Provenance and peer review:** Not commissioned; externally peer-reviewed

17 383 **Acknowledgments:** The authors would like to acknowledge Dr. Zufishan Alam for assistance in problem-  
18  
19 384 solving data search issues.

20  
21 385 **Provenance and peer review:** Not commissioned; externally peer-reviewed.

22  
23 386 **Open Access:** This is an open-access article distributed in accordance with the Creative Commons  
24  
25 387 Attribution Non-Commercial (CC BY-NC 4.0) license, which permits others to distribute, remix, adapt,  
26  
27 388 build upon this work non-commercially, and license their derivative works on different terms, provided the  
28  
29 389 original work is properly cited, appropriate credit is given, any changes made indicated, and the use is non-  
30  
31 390 commercial. See: <http://creativecommons.org/licenses/by-nc/4.0/>

### 391 **ORCID numbers**

32  
33 392 Ms. Rouwida ElKhalil: 0000-0002-2031-837X

34  
35 393 Dr. Mohamad AlMekkawi: 0000-0002-2315-7479

36  
37 394 Dr. Matt O'Connor: 0000-0002-6188-8870

38  
39 395 Mr. Moustafa Sherif: 0000-0002-8781-5098

40  
41 396 Ms. Messaouda Belfakir:0009-0006-0975-4839

42  
43 397 Dr. Emad Masaudi: 0000-0002-7360-7693

44  
45 398 Dr. Luai A. Ahmed: 0000-0001-5292-8212

46  
47 399 Dr. Rami H. AlRifai: 0000-0001-6102-0353

48  
49 400 Dr. Rasha Bayoumi : 0000-0001-6115-1820

50  
51 401 Dr. Iffat Elbarazi: 0000-0001-7151-2175

52  
53 402

54  
55 403 Figure. 1. Legend/caption is "Systematic review methodology summary".

56  
57 404

## REFERENCES

1. World Health Organisation. WHO menu of cost-effective interventions for mental health [Internet]. 2021 [cited 2024 Jan 31]. Available from: <https://www.who.int/publications-detail-redirect/9789240031081>
2. Healthy People 2030. health.gov. [cited 2024 Feb 3]. History of Health Literacy Definitions - Healthy People 2030. Available from: <https://health.gov/healthypeople/priority-areas/health-literacy-healthy-people-2030/history-health-literacy-definitions>
3. Kutcher S, Wei Y, Coniglio C. Mental Health Literacy: Past, Present, and Future. *Can J Psychiatry*. 2016 Mar;61(3):154–8.
4. Jorm AF, Korten AE, Jacomb PA, Christensen H, Rodgers B, Pollitt P. “Mental health literacy”: a survey of the public’s ability to recognise mental disorders and their beliefs about the effectiveness of treatment. *Medical Journal of Australia*. 1997 Feb;166(4):182–6.
5. Jorm AF. Why We Need the Concept of ‘Mental Health Literacy’. *Health Commun*. 2015;30(12):1166–8.
6. Sweileh WM. Global research activity on mental health literacy. *Middle East Current Psychiatry*. 2021 Sep 2;28(1):43.
7. Bennett H, Allitt B, Hanna F. A perspective on mental health literacy and mental health issues among Australian youth: Cultural, social, and environmental evidence! *Frontiers in Public Health* [Internet]. 2023 [cited 2024 Feb 3];11. Available from: <https://www.frontiersin.org/articles/10.3389/fpubh.2023.1065784>
8. Jorm AF. Mental health literacy: Empowering the community to take action for better mental health. *American Psychologist*. 2012 Apr;67(3):231–43.
9. World Health Organisation. Promoting mental health : concepts, emerging evidence, practice : summary report / a report from the World Health Organization, Department of Mental Health and Substance Abuse in collaboration with the Victorian Health Promotion Foundation (VicHealth) and the University of Melbourne. [Internet]. Geneva: World Health Organization; 2004 p. 1–70. Report No.: ISBN 92 4 159159 5-(NLM classification: WM 31.5). Available from: <https://apps.who.int/iris/bitstream/handle/10665/42940/9241591595.pdf>
10. Spiker DA, Hammer JH. Mental health literacy as theory: current challenges and future directions. *Journal of Mental Health*. 2019 May 4;28(3):238–42.
11. O’Connor M, Casey L. The Mental Health Literacy Scale (MHLS): A new scale-based measure of mental health literacy. *Psychiatry Res*. 2015 Sep 30;229(1–2):511–6.
12. Hughes R. Considering the Vignette Technique and its Application to a Study of Drug Injecting and HIV Risk and Safer Behaviour. *Sociology of Health & Illness*. 1998;20(3):381–400.
13. Chow E, Faye L, Sawatzky R, Webster G, Cho MZ. PROMs Background Document [Internet]. Ottawa, Ontario: The Canadian Institute for Health Information (CIHI); 2015 p. 1–38. Available from: [https://www.cihi.ca/sites/default/files/proms\\_background\\_may21\\_en-web\\_0.pdf](https://www.cihi.ca/sites/default/files/proms_background_may21_en-web_0.pdf)

- 1  
2 443 14. Chaves C, Sequeira C, Duarte J, Nelas P, Gonçalves A, Santos E. Mental health literacy: a systematic  
3 444 review of the measurement instruments. *International Journal of Developmental and Educational*  
4 445 *Psychology Revista INFAD de psicología*. 2022 Jan 14;3:181–94.
- 5  
6 446 15. Montagni I, González Caballero JL. Validation of the Mental Health Literacy Scale in French  
7 447 University Students. *Behav Sci (Basel)*. 2022 Jul 28;12(8):259.
- 8  
9 448 16. Krohne N, Gomboc V, Lavrič M, Podlogar T, Poštuvan V, Šedivy NZ, et al. Slovenian Validation of  
10 449 the Mental Health Literacy Scale (S-MHLS) on the General Population: A Four-Factor Model.  
11 450 *Inquiry*. 2022 Feb 8;59:00469580211047193.
- 12  
13 451 17. Arafat SMY, Chowdhury HR, Qusar MS, Hafez MA. Cross Cultural Adaptation & Psychometric  
14 452 Validation of Research Instruments: a Methodological Review -. *Journal of Behavioral Health*.  
15 453 2016;5(3):129–36.
- 16  
17 454 18. Huang WY, Wong SH. Cross-Cultural Validation. In: Michalos AC, editor. *Encyclopedia of Quality*  
18 455 *of Life and Well-Being Research* [Internet]. Dordrecht: Springer Netherlands; 2014 [cited 2023 May  
19 456 9]. p. 1369–71. Available from: [http://link.springer.com/10.1007/978-94-007-0753-5\\_630](http://link.springer.com/10.1007/978-94-007-0753-5_630)
- 20  
21 457 19. Speksnijder CM, Koppelaar T, Knottnerus JA, Spigt M, Staal JB, Terwee CB. Measurement  
22 458 Properties of the Quebec Back Pain Disability Scale in Patients With Nonspecific Low Back Pain:  
23 459 Systematic Review. *Phys Ther*. 2016 Nov;96(11):1816–31.
- 24  
25 460 20. Shamseer L, Moher D, Clarke M, Ghersi D, Liberati A, Petticrew M, et al. Preferred reporting items  
26 461 for systematic review and meta-analysis protocols (PRISMA-P) 2015: elaboration and explanation.  
27 462 *BMJ*. 2015 Jan 2;349(jan02 1):g7647–g7647.
- 28  
29 463 21. Stephenson M, Riitano D, Wilson S, Leonardi-Bee J, Mabire C, Cooper K, et al. Chapter 12:  
30 464 Systematic reviews of measurement properties. In: *JBIM Manual for Evidence Synthesis* [Internet].  
31 465 JBI; 2020 [cited 2023 Sep 10]. Available from: [https://jbi-global-](https://jbi-global-wiki.refined.site/space/MANUAL/4686202/Chapter+12%3A+Systematic+reviews+of+measurement+properties)  
32 466 [wiki.refined.site/space/MANUAL/4686202/Chapter+12%3A+Systematic+reviews+of+measurement](https://jbi-global-wiki.refined.site/space/MANUAL/4686202/Chapter+12%3A+Systematic+reviews+of+measurement+properties)  
33 467 [+properties](https://jbi-global-wiki.refined.site/space/MANUAL/4686202/Chapter+12%3A+Systematic+reviews+of+measurement+properties)
- 34  
35 468 22. Prinsen C a. C, Mokkink LB, Bouter LM, Alonso J, Patrick DL, de Vet HCW, et al. COSMIN  
36 469 guideline for systematic reviews of patient-reported outcome measures. *Qual Life Res*. 2018  
37 470 May;27(5):1147–57.
- 38  
39 471 23. Page MJ, McKenzie JE, Bossuyt PM, Boutron I, Hoffmann TC, Mulrow CD, et al. The PRISMA  
40 472 2020 statement: an updated guideline for reporting systematic reviews. *BMJ*. 2021 Mar 29;n71.
- 41  
42 473 24. Lockwood C, dos Santos KB, Pap R. Practical Guidance for Knowledge Synthesis: Scoping Review  
43 474 Methods. *Asian Nursing Research*. 2019 Dec 1;13(5):287–94.
- 44  
45 475 25. Terwee CB, Jansma EP, Riphagen II, de Vet HCW. Development of a methodological PubMed  
46 476 search filter for finding studies on measurement properties of measurement instruments. *Qual Life*  
47 477 *Res*. 2009 Oct 1;18(8):1115–23.
- 48  
49 478 26. Büchter RB, Weise A, Pieper D. Reporting of methods to prepare, pilot and perform data extraction  
50 479 in systematic reviews: analysis of a sample of 152 Cochrane and non-Cochrane reviews. *BMC*  
51 480 *Medical Research Methodology*. 2021 Nov 6;21(1):240.

- 1  
2 481 27. Mokkink LB, de Vet HCW, Prinsen C a. C, Patrick DL, Alonso J, Bouter LM, et al. COSMIN Risk  
3 482 of Bias checklist for systematic reviews of Patient-Reported Outcome Measures. *Qual Life Res.* 2018  
4 483 May;27(5):1171–9.
- 5  
6 484 28. Mokkink LB, Prinsen CA, Patrick DL, Alonso J, Bouter LM, de Vet HC, et al. COSMIN Study  
7 485 Design checklist for Patient-reported outcome measurement instruments. 2019;1–32.
- 8  
9 486 29. Terwee C, Prinsen C, Chiarotto A, Vet H, Bouter L, Alonso J, et al. COSMIN methodology for  
10 487 assessing the content validity of PROMs User manual. 2018; Available from: [https://cosmin.nl/wp-](https://cosmin.nl/wp-content/uploads/COSMIN-methodology-for-content-validity-user-manual-v1.pdf)  
11 488 [content/uploads/COSMIN-methodology-for-content-validity-user-manual-v1.pdf](https://cosmin.nl/wp-content/uploads/COSMIN-methodology-for-content-validity-user-manual-v1.pdf)
- 12  
13 489 30. Hair JF, Black WC, Babin BJ, Anderson RE. *Multivariate Data Analysis* [Internet]. Pearson  
14 490 Education Limited; 2013. (Always learning). Available from:  
15 491 <https://books.google.ae/books?id=VvXZnQEACAAJ>
- 16  
17 492 31. DerSimonian R, Laird N. Meta-analysis in clinical trials revisited. *Contemp Clin Trials.* 2015  
18 493 Nov;45(Pt A):139–45.
- 19  
20 494 32. Collins NJ, Prinsen C a. C, Christensen R, Bartels EM, Terwee CB, Roos EM. Knee Injury and  
21 495 Osteoarthritis Outcome Score (KOOS): systematic review and meta-analysis of measurement  
22 496 properties. *Osteoarthritis and Cartilage.* 2016 Aug 1;24(8):1317–29.

497

498

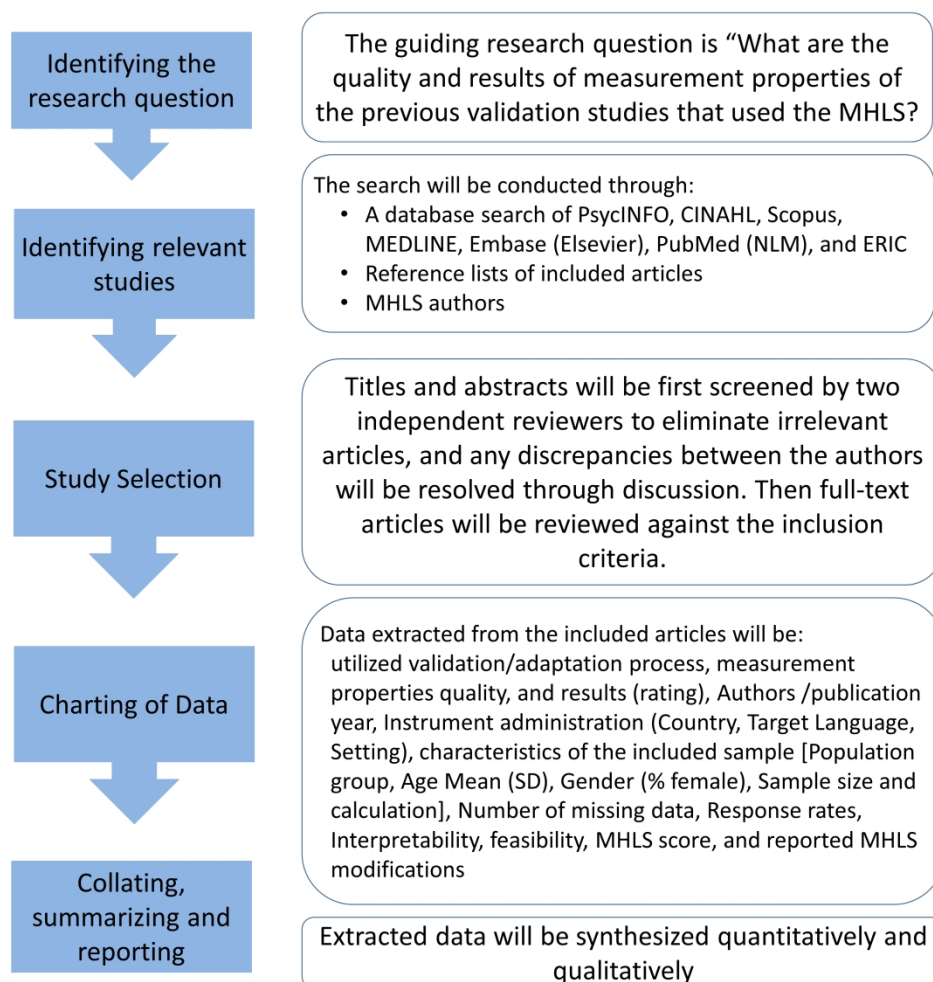

Figure 1- Systematic Review Methodology Summary

276x282mm (300 x 300 DPI)

## Supplementary 1 Search Strategies

| 1.1. Search for PubMed |                                                                 |                                                                                                                                                                                                                                                                                                                                                                                                                                                                                                                                                                                                                                                                                                                                                                                                                                                                                                                                                                                                                                                                                                                                                                                                                                                                                                                                                                                                                                                                                                                                                                                                                                                                                                                                                                                                                                                                                                                                                                                                                                                                                                                                                                                                                                                                                                                                                                                                                                       |
|------------------------|-----------------------------------------------------------------|---------------------------------------------------------------------------------------------------------------------------------------------------------------------------------------------------------------------------------------------------------------------------------------------------------------------------------------------------------------------------------------------------------------------------------------------------------------------------------------------------------------------------------------------------------------------------------------------------------------------------------------------------------------------------------------------------------------------------------------------------------------------------------------------------------------------------------------------------------------------------------------------------------------------------------------------------------------------------------------------------------------------------------------------------------------------------------------------------------------------------------------------------------------------------------------------------------------------------------------------------------------------------------------------------------------------------------------------------------------------------------------------------------------------------------------------------------------------------------------------------------------------------------------------------------------------------------------------------------------------------------------------------------------------------------------------------------------------------------------------------------------------------------------------------------------------------------------------------------------------------------------------------------------------------------------------------------------------------------------------------------------------------------------------------------------------------------------------------------------------------------------------------------------------------------------------------------------------------------------------------------------------------------------------------------------------------------------------------------------------------------------------------------------------------------------|
|                        | <i>Population Search</i>                                        | This search did not include a population search since there is no restriction on population type, age and settings                                                                                                                                                                                                                                                                                                                                                                                                                                                                                                                                                                                                                                                                                                                                                                                                                                                                                                                                                                                                                                                                                                                                                                                                                                                                                                                                                                                                                                                                                                                                                                                                                                                                                                                                                                                                                                                                                                                                                                                                                                                                                                                                                                                                                                                                                                                    |
| #1                     | <i>Instrument Search<br/>MHLS O'Conner and<br/>Casey (2015)</i> | ("mental health literacy scale*") OR (MHLS)                                                                                                                                                                                                                                                                                                                                                                                                                                                                                                                                                                                                                                                                                                                                                                                                                                                                                                                                                                                                                                                                                                                                                                                                                                                                                                                                                                                                                                                                                                                                                                                                                                                                                                                                                                                                                                                                                                                                                                                                                                                                                                                                                                                                                                                                                                                                                                                           |
| #2                     | <i>Construct search<br/>mental health literacy</i>              | ("mental health"[Title/Abstract] OR "mental health"[Title/Abstract] OR "mental health"[MeSH Terms] OR "mental stabilit*" [Title/Abstract] OR "mental balanc*" [Title/Abstract] OR "mental hygien*" [Title/Abstract] OR "sanit*" [Title/Abstract] OR "psychiatr*" [Title/Abstract] OR "life disrupt*" [Title/Abstract] OR "mental ill*" [Title/Abstract] OR "mental ill*" [Title/Abstract] OR "mental disord*" [Title/Abstract] OR "mental wellbeing*" [Title/Abstract] OR "mental well being*" [Title/Abstract] OR "mental condition*" [Title/Abstract] OR "Mental Disorders"[MeSH Terms]) AND ("Health Literacy"[MeSH Terms] OR "health literac*" [Title/Abstract] OR "health education*" [Title/Abstract] OR "health train*" [Title/Abstract] OR "health aware*" [Title/Abstract])                                                                                                                                                                                                                                                                                                                                                                                                                                                                                                                                                                                                                                                                                                                                                                                                                                                                                                                                                                                                                                                                                                                                                                                                                                                                                                                                                                                                                                                                                                                                                                                                                                                  |
| #3                     | <i>Filter for<br/>measurement<br/>properties</i>                | ("instrumentation" [Subheading]) OR "methods" [Subheading] OR "Validation Stud*" [Publication Type] OR Comparative Study [Publication Type] OR "psychometrics" [MeSH] OR psychometr* [Title/Abstract] OR clinimetr* [Text Word] OR clinometr* [Text Word] OR "Outcome Assessment, Health Care" [Mesh] OR outcome assessment [Title/Abstract] OR outcome measure* [Text Word] OR "observer variation" [MeSH] OR observer variation [Title/Abstract] OR "Health Status Indicators" [Mesh] OR "reproducibility of results" [MeSH] OR reproducib* [Title/Abstract] OR "discriminant analysis" [MeSH] OR reliab* [Title/Abstract] OR unreliab* [Title/Abstract] OR valid* [Title/Abstract] OR coefficient [Title/Abstract] OR homogeneity [Title/Abstract] OR homogeneous [Title/Abstract] OR "internal consistency" [Title/Abstract] OR (cronbach* [Title/Abstract] AND (alpha [Title/Abstract] OR alphas [Title/Abstract])) OR (item [Title/Abstract] AND (correlation* [Title/Abstract] OR selection* [Title/Abstract] OR reduction* [Title/Abstract])) OR agreement [Title/Abstract] OR precision [Title/Abstract] OR imprecision [Title/Abstract] OR "precise values" [Title/Abstract] OR test- retest [Title/Abstract] OR (test [Title/Abstract] AND retest [Title/Abstract]) OR (reliab* [Title/Abstract] AND (test [Title/Abstract] OR retest [Title/Abstract])) OR stability [Title/Abstract] OR interrater [Title/Abstract] OR inter-rater [Title/Abstract] OR intrarater [Title/Abstract] OR intra-rater [Title/Abstract] OR intertester [Title/Abstract] OR inter-tester [Title/Abstract] OR intratester [Title/Abstract] OR intra-tester [Title/Abstract] OR interobserver [Title/Abstract] OR inter-observer [Title/Abstract] OR intraobserver [Title/Abstract] OR intraobserver [Title/Abstract] OR intertechnician [Title/Abstract] OR inter-technician [Title/Abstract] OR intratechnician [Title/Abstract] OR intra-technician [Title/Abstract] OR interexaminer [Title/Abstract] OR inter-examiner [Title/Abstract] OR intraexaminer [Title/Abstract] OR intra-examiner [Title/Abstract] OR interassay [Title/Abstract] OR inter-assay [Title/Abstract] OR intraassay [Title/Abstract] OR intra-assay [Title/Abstract] OR interindividual [Title/Abstract] OR inter-individual [Title/Abstract] OR intraindividual [Title/Abstract] OR intra-individual [Title/Abstract] OR interparticipant [Title/Abstract] OR inter- |

|    |                           |                                                                                                                                                                                                                                                                                                                                                                                                                                                                                                                                                                                                                                                                                                                                                                                                                                                                                                                                                                                                                                                                                                                                                                                                                                                                                                                                                                                                                                                                                                                                                                                                                                                                                                                                                                                                                                                                                                                                                                                                                                                                                                                                                                                                                                                                                                         |
|----|---------------------------|---------------------------------------------------------------------------------------------------------------------------------------------------------------------------------------------------------------------------------------------------------------------------------------------------------------------------------------------------------------------------------------------------------------------------------------------------------------------------------------------------------------------------------------------------------------------------------------------------------------------------------------------------------------------------------------------------------------------------------------------------------------------------------------------------------------------------------------------------------------------------------------------------------------------------------------------------------------------------------------------------------------------------------------------------------------------------------------------------------------------------------------------------------------------------------------------------------------------------------------------------------------------------------------------------------------------------------------------------------------------------------------------------------------------------------------------------------------------------------------------------------------------------------------------------------------------------------------------------------------------------------------------------------------------------------------------------------------------------------------------------------------------------------------------------------------------------------------------------------------------------------------------------------------------------------------------------------------------------------------------------------------------------------------------------------------------------------------------------------------------------------------------------------------------------------------------------------------------------------------------------------------------------------------------------------|
|    |                           | <p>participant[Title/Abstract] OR intraparticipant[Title/Abstract] OR intraparticipant[Title/Abstract] OR kappa[Title/Abstract] OR kappa's[Title/Abstract] OR kappas[Title/Abstract] OR repeatab*[Title/Abstract] OR ((replicab*[Title/Abstract] OR repeated[Title/Abstract]) AND (measure[Title/Abstract] OR measures[Title/Abstract] OR findings[Title/Abstract] OR result[Title/Abstract] OR results[Title/Abstract] OR test[Title/Abstract] OR tests[Title/Abstract])) OR generaliza*[Title/Abstract] OR generalisa*[Title/Abstract] OR concordance[Title/Abstract] OR (intraclass[Title/Abstract] AND correlation*[Title/Abstract]) OR discriminative[Title/Abstract] OR "known group"[Title/Abstract] OR factor analysis[Title/Abstract] OR factor analyses[Title/Abstract] OR dimension*[Title/Abstract] OR subscale*[Title/Abstract] OR (multitrait[Title/Abstract] AND scaling[Title/Abstract] AND (analysis[Title/Abstract] OR analyses[Title/Abstract])) OR item discriminant[Title/Abstract] OR interscale correlation*[Title/Abstract] OR error[Title/Abstract] OR errors[Title/Abstract] OR "individual variability"[Title/Abstract] OR (variability[Title/Abstract] OR (analysis[Title/Abstract] OR values[Title/Abstract])) OR (uncertainty[Title/Abstract] AND (measurement[Title/Abstract] OR measuring[Title/Abstract])) OR "standard error of measurement"[Title/Abstract] OR sensitiv*[Title/Abstract] OR responsive*[Title/Abstract] OR ((minimal[Title/Abstract] OR minimally[Title/Abstract] OR clinical[Title/Abstract] OR clinically[Title/Abstract]) AND (important[Title/Abstract] OR significant[Title/Abstract] OR detectable[Title/Abstract]) AND(change[Title/Abstract] OR difference[Title/Abstract])) OR (small*[Title/Abstract] AND (real[Title/Abstract] OR detectable[Title/Abstract]) AND (change[Title/Abstract] OR difference[Title/Abstract]) OR meaningful change[Title/Abstract] OR "ceiling effect"[Title/Abstract] OR "floor effect"[Title/Abstract] OR "Item response model"[Title/Abstract] OR IRT[Title/Abstract] OR Rasch[Title/Abstract] OR "Differential item functioning"[Title/Abstract] OR DIF[Title/Abstract] OR "computer adaptive testing"[Title/Abstract] OR "item bank"[Title/Abstract] OR "cross-cultural equivalence"[Title/Abstract])</p> |
| #4 | <i>Exclusion filter</i>   | <p>("address"[Publication Type] OR "biography"[Publication Type] OR "case reports"[Publication Type] OR "comment"[Publication Type] OR "directory"[Publication Type] OR "editorial"[Publication Type] OR "festschrift"[Publication Type] OR "interview"[Publication Type] OR "lectur*[Publication Type] OR "legal case*[Publication Type] OR "legislation"[Publication Type] OR "letter"[Publication Type] OR "news"[Publication Type] OR "newspaper article"[Publication Type] OR "patient education handout"[Publication Type] OR "popular work*[Publication Type] OR "congress*[Publication Type] OR "consensus development conference"[Publication Type] OR "consensus development conference, nih"[Publication Type] OR "practice guideline"[Publication Type]) NOT ("animals"[MeSH Terms] NOT "humans"[MeSH Terms])</p>                                                                                                                                                                                                                                                                                                                                                                                                                                                                                                                                                                                                                                                                                                                                                                                                                                                                                                                                                                                                                                                                                                                                                                                                                                                                                                                                                                                                                                                                           |
| #5 | #1 AND #2 AND #3<br>NOT#4 | <p>((("mental health"[Title/Abstract] OR "mental health"[Title/Abstract] OR "mental health"[MeSH Terms] OR "mental stabilit*[Title/Abstract] OR "mental balanc*[Title/Abstract] OR "mental hygien*[Title/Abstract] OR "sanit*[Title/Abstract] OR "psychiatr*[Title/Abstract] OR "life disrupt*[Title/Abstract] OR "mental ill*[Title/Abstract] OR "mental ill*[Title/Abstract] OR "mental disord*[Title/Abstract] OR "mental wellbeing*[Title/Abstract] OR "mental well being*[Title/Abstract] OR "mental condition*[Title/Abstract] OR "Mental Disorders"[MeSH Terms]) AND ("Health Literacy"[MeSH Terms] OR "health literac*[Title/Abstract]</p>                                                                                                                                                                                                                                                                                                                                                                                                                                                                                                                                                                                                                                                                                                                                                                                                                                                                                                                                                                                                                                                                                                                                                                                                                                                                                                                                                                                                                                                                                                                                                                                                                                                      |

|  |  |                                                                                                                                                                                                                                                                                                                                                                                                                                                                                                                                                                                                                                                                                                                                                                                                                                                                                                                                                                                                                                                                                                                                                                                                                                                                                                                                                                                                                                                                                                                                                                                                                                                                                                                                                                                                                                                                                                                                                                                                                                                                                                                                                                                                                                                                                                                                                                                                                                                                                                                                                                                                                                                                                                                                                                                                                                                                                                                                                                                                                                                                                                                                                                                                                                                                                                                                                                                                                                                                                                                                                                                                                                                                                                                                                                                                                                                                                                                                                                                                            |
|--|--|------------------------------------------------------------------------------------------------------------------------------------------------------------------------------------------------------------------------------------------------------------------------------------------------------------------------------------------------------------------------------------------------------------------------------------------------------------------------------------------------------------------------------------------------------------------------------------------------------------------------------------------------------------------------------------------------------------------------------------------------------------------------------------------------------------------------------------------------------------------------------------------------------------------------------------------------------------------------------------------------------------------------------------------------------------------------------------------------------------------------------------------------------------------------------------------------------------------------------------------------------------------------------------------------------------------------------------------------------------------------------------------------------------------------------------------------------------------------------------------------------------------------------------------------------------------------------------------------------------------------------------------------------------------------------------------------------------------------------------------------------------------------------------------------------------------------------------------------------------------------------------------------------------------------------------------------------------------------------------------------------------------------------------------------------------------------------------------------------------------------------------------------------------------------------------------------------------------------------------------------------------------------------------------------------------------------------------------------------------------------------------------------------------------------------------------------------------------------------------------------------------------------------------------------------------------------------------------------------------------------------------------------------------------------------------------------------------------------------------------------------------------------------------------------------------------------------------------------------------------------------------------------------------------------------------------------------------------------------------------------------------------------------------------------------------------------------------------------------------------------------------------------------------------------------------------------------------------------------------------------------------------------------------------------------------------------------------------------------------------------------------------------------------------------------------------------------------------------------------------------------------------------------------------------------------------------------------------------------------------------------------------------------------------------------------------------------------------------------------------------------------------------------------------------------------------------------------------------------------------------------------------------------------------------------------------------------------------------------------------------------------|
|  |  | <p>OR "health education*" [Title/Abstract] OR "health train*" [Title/Abstract] OR "health aware*" [Title/Abstract]) AND ((("instrumentation" [Subheading]) OR "methods" [Subheading] OR "Validation Stud*" [Publication Type] OR Comparative Study [Publication Type] OR "psychometrics" [MeSH] OR psychometr* [Title/Abstract] OR clinimetr* [Text Word] OR clinometr* [Text Word] OR "Outcome Assessment, Health Care" [Mesh] OR outcome assessment [Title/Abstract] OR outcome measure* [Text Word] OR "observer variation" [MeSH] OR observer variation [Title/Abstract] OR "Health Status Indicators" [Mesh] OR "reproducibility of results" [MeSH] OR reproducib* [Title/Abstract] OR "discriminant analysis" [MeSH] OR reliab* [Title/Abstract] OR unreliab* [Title/Abstract] OR valid* [Title/Abstract] OR coefficient [Title/Abstract] OR homogeneity [Title/Abstract] OR homogeneous [Title/Abstract] OR "internal consistency" [Title/Abstract] OR (cronbach* [Title/Abstract] AND (alpha [Title/Abstract] OR alphas [Title/Abstract])) OR (item [Title/Abstract] AND (correlation* [Title/Abstract] OR selection* [Title/Abstract] OR reduction* [Title/Abstract])) OR agreement [Title/Abstract] OR precision [Title/Abstract] OR imprecision [Title/Abstract] OR "precise values" [Title/Abstract] OR test- retest [Title/Abstract] OR (test [Title/Abstract] AND retest [Title/Abstract] OR (reliab* [Title/Abstract] AND (test [Title/Abstract] OR retest [Title/Abstract])) OR stability [Title/Abstract] OR interrater [Title/Abstract] OR inter-rater [Title/Abstract] OR intrarater [Title/Abstract] OR intra-rater [Title/Abstract] OR intertester [Title/Abstract] OR inter-tester [Title/Abstract] OR intratester [Title/Abstract] OR intra-tester [Title/Abstract] OR interobserver [Title/Abstract] OR inter-observer [Title/Abstract] OR intraobserver [Title/Abstract] OR intraobserver [Title/Abstract] OR intertechnician [Title/Abstract] OR inter-technician [Title/Abstract] OR intratechnician [Title/Abstract] OR intra-technician [Title/Abstract] OR interexaminer [Title/Abstract] OR inter-examiner [Title/Abstract] OR intraexaminer [Title/Abstract] OR intra-examiner [Title/Abstract] OR interassay [Title/Abstract] OR inter-assay [Title/Abstract] OR intraassay [Title/Abstract] OR intra-assay [Title/Abstract] OR interindividual [Title/Abstract] OR inter-individual [Title/Abstract] OR intraindividual [Title/Abstract] OR intra-individual [Title/Abstract] OR interparticipant [Title/Abstract] OR inter-participant [Title/Abstract] OR intraparticipant [Title/Abstract] OR intra-participant [Title/Abstract] OR kappa [Title/Abstract] OR kappa's [Title/Abstract] OR kappas [Title/Abstract] OR repeatab* [Title/Abstract] OR ((replicab* [Title/Abstract] OR repeated [Title/Abstract]) AND (measure [Title/Abstract] OR measures [Title/Abstract] OR findings [Title/Abstract] OR result [Title/Abstract] OR results [Title/Abstract] OR test [Title/Abstract] OR tests [Title/Abstract])) OR generaliza* [Title/Abstract] OR generalisa* [Title/Abstract] OR concordance [Title/Abstract] OR (intraclass [Title/Abstract] AND correlation* [Title/Abstract]) OR discriminative [Title/Abstract] OR "known group" [Title/Abstract] OR factor analysis [Title/Abstract] OR factor analyses [Title/Abstract] OR dimension* [Title/Abstract] OR subscale* [Title/Abstract] OR (multitrait [Title/Abstract] AND scaling [Title/Abstract] AND (analysis [Title/Abstract] OR analyses [Title/Abstract])) OR item discriminant [Title/Abstract] OR interscale correlation* [Title/Abstract] OR error [Title/Abstract] OR errors [Title/Abstract] OR "individual variability" [Title/Abstract] OR (variability [Title/Abstract] AND (analysis [Title/Abstract] OR values [Title/Abstract])) OR (uncertainty [Title/Abstract] AND (measurement [Title/Abstract] OR measuring [Title/Abstract])) OR "standard error of measurement" [Title/Abstract]</p> |
|--|--|------------------------------------------------------------------------------------------------------------------------------------------------------------------------------------------------------------------------------------------------------------------------------------------------------------------------------------------------------------------------------------------------------------------------------------------------------------------------------------------------------------------------------------------------------------------------------------------------------------------------------------------------------------------------------------------------------------------------------------------------------------------------------------------------------------------------------------------------------------------------------------------------------------------------------------------------------------------------------------------------------------------------------------------------------------------------------------------------------------------------------------------------------------------------------------------------------------------------------------------------------------------------------------------------------------------------------------------------------------------------------------------------------------------------------------------------------------------------------------------------------------------------------------------------------------------------------------------------------------------------------------------------------------------------------------------------------------------------------------------------------------------------------------------------------------------------------------------------------------------------------------------------------------------------------------------------------------------------------------------------------------------------------------------------------------------------------------------------------------------------------------------------------------------------------------------------------------------------------------------------------------------------------------------------------------------------------------------------------------------------------------------------------------------------------------------------------------------------------------------------------------------------------------------------------------------------------------------------------------------------------------------------------------------------------------------------------------------------------------------------------------------------------------------------------------------------------------------------------------------------------------------------------------------------------------------------------------------------------------------------------------------------------------------------------------------------------------------------------------------------------------------------------------------------------------------------------------------------------------------------------------------------------------------------------------------------------------------------------------------------------------------------------------------------------------------------------------------------------------------------------------------------------------------------------------------------------------------------------------------------------------------------------------------------------------------------------------------------------------------------------------------------------------------------------------------------------------------------------------------------------------------------------------------------------------------------------------------------------------------------------------|



|  |  |                                                                                                                                                                                                                                                                                                                                                                                                                                                                                                                                                                                                                                                                                                                                                                                                                                                                                                                                                                                                                                                                                                                                                                                                                                                                                                                                                                                                                                                                                                                                                                                                                                                                                                                                                                                                                   |
|--|--|-------------------------------------------------------------------------------------------------------------------------------------------------------------------------------------------------------------------------------------------------------------------------------------------------------------------------------------------------------------------------------------------------------------------------------------------------------------------------------------------------------------------------------------------------------------------------------------------------------------------------------------------------------------------------------------------------------------------------------------------------------------------------------------------------------------------------------------------------------------------------------------------------------------------------------------------------------------------------------------------------------------------------------------------------------------------------------------------------------------------------------------------------------------------------------------------------------------------------------------------------------------------------------------------------------------------------------------------------------------------------------------------------------------------------------------------------------------------------------------------------------------------------------------------------------------------------------------------------------------------------------------------------------------------------------------------------------------------------------------------------------------------------------------------------------------------|
|  |  | <p>Title/Abstract] OR sensitiv*[Title/Abstract] OR responsive*[Title/Abstract] OR ((minimal[Title/Abstract] OR minimally[Title/Abstract] OR clinical[Title/Abstract] OR clinically[Title/Abstract]) AND (important[Title/Abstract] OR significant[Title/Abstract] OR detectable[Title/Abstract]) AND(change[Title/Abstract] OR difference[Title/Abstract])) OR (small*[Title/Abstract] AND (real[Title/Abstract] OR detectable[Title/Abstract]) AND (change[Title/Abstract] OR difference[Title/Abstract]) OR meaningful change [Title/Abstract] OR “ceiling effect”[Title/Abstract] OR “floor effect”[Title/Abstract] OR “Item response model”[Title/Abstract] OR IRT[Title/Abstract] OR Rasch[Title/Abstract] OR “Differential item functioning”[Title/Abstract] OR DIF[Title/Abstract] OR “computer adaptive testing”[Title/Abstract] OR “item bank”[Title/Abstract] OR “cross-cultural equivalence”[Title/Abstract])) NOT (“address”[Publication Type] OR “biography”[Publication Type] OR “case reports”[Publication Type] OR “comment”[Publication Type] OR “directory”[Publication Type] OR “editorial”[Publication Type] OR “festschrift”[ Publication Type] OR “interview”[Publication Type] OR “lectur*”[Publication Type] OR “legal case*”[Publication Type] OR “legislation”[Publication Type] OR “letter”[Publication Type] OR “news”[Publication Type] OR “newspaper article”[Publication Type] OR “patient education handout”[Publication Type] OR “popular work*”[Publication Type] OR “congress*” [Publication Type] OR “consensus development conference”[ Publication Type] OR “consensus development conference, nih”[Publication Type] OR “practice guideline”[ Publication Type]) NOT (“animals”[MeSH Terms] NOT “humans”[MeSH Terms])) AND (“mental health literacy scale*” OR (MHLS))</p> |
|  |  | <p>Result in documents<br/>Final= 6<br/>Exclusion =14 (Different tool 13-RCT 1)</p>                                                                                                                                                                                                                                                                                                                                                                                                                                                                                                                                                                                                                                                                                                                                                                                                                                                                                                                                                                                                                                                                                                                                                                                                                                                                                                                                                                                                                                                                                                                                                                                                                                                                                                                               |

\*\*Note. The initial PubMed search was conducted on June 3, 2023, and was limited to English.

**Table A2. Final Search Strategy**

|                                  |
|----------------------------------|
| <b>1.2. Search for Embase</b>    |
|                                  |
| <b>1.3. Search for PsychINFO</b> |
|                                  |
| <b>1.4. Search for CINAHL</b>    |
|                                  |
| <b>1.5. Search for ERIC</b>      |
|                                  |
| <b>1.6. Search for Medline</b>   |

## Supplementary 2 Data Charting Instruments

### 2 A. Descriptive Characteristics of The Included Studies

| #                                           | Study (Authors/year) | Study Design | Instrument Administration |          |         | Population |                  |                   |                   | Methodological Process              |                                                            | MHLS score | Reported MHLS modifications |
|---------------------------------------------|----------------------|--------------|---------------------------|----------|---------|------------|------------------|-------------------|-------------------|-------------------------------------|------------------------------------------------------------|------------|-----------------------------|
|                                             |                      |              | Country                   | Language | Setting | N          | Age Mean (SD) yr | Gender (% female) | Selection process | Summary of adaptation process steps | Adaptation process / validation process reported guideline |            |                             |
| 1.                                          |                      |              |                           |          |         |            |                  |                   |                   |                                     |                                                            |            |                             |
| 2.                                          |                      |              |                           |          |         |            |                  |                   |                   |                                     |                                                            |            |                             |
| *Sample size calculation reference provided |                      |              |                           |          |         |            |                  |                   |                   |                                     |                                                            |            |                             |

### 2 B. Results of Studies on Measurement Properties

| Study (authors/date)                       | Country (language) in which the MHLS was evaluated | Structural validity |              |                 | Internal Consistency |              |                 | Cross-cultural validity/ measurement invariance |              |                 | Reliability |              |                 |
|--------------------------------------------|----------------------------------------------------|---------------------|--------------|-----------------|----------------------|--------------|-----------------|-------------------------------------------------|--------------|-----------------|-------------|--------------|-----------------|
|                                            |                                                    | n                   | Meth quality | Result (rating) | n                    | Meth quality | Result (rating) | n                                               | Meth quality | Result (rating) | n           | Meth quality | Result (rating) |
|                                            |                                                    |                     |              |                 |                      |              |                 |                                                 |              |                 |             |              |                 |
|                                            |                                                    |                     |              |                 |                      |              |                 |                                                 |              |                 |             |              |                 |
|                                            |                                                    |                     |              |                 |                      |              |                 |                                                 |              |                 |             |              |                 |
| Pooled or summary results (overall rating) |                                                    |                     |              |                 |                      |              |                 |                                                 |              |                 |             |              |                 |

| Study (authors/date)                       | Country (language) in which the MHLS was evaluated | Measurement Error |              |                 | Criterion validity |              |                 | Hypothesis testing |              |                 | Responsiveness |              |                 |
|--------------------------------------------|----------------------------------------------------|-------------------|--------------|-----------------|--------------------|--------------|-----------------|--------------------|--------------|-----------------|----------------|--------------|-----------------|
|                                            |                                                    | n                 | Meth quality | Result (rating) | n                  | Meth quality | Result (rating) | n                  | Meth quality | Result (rating) | n              | Meth quality | Result (rating) |
|                                            |                                                    |                   |              |                 |                    |              |                 |                    |              |                 |                |              |                 |
|                                            |                                                    |                   |              |                 |                    |              |                 |                    |              |                 |                |              |                 |
|                                            |                                                    |                   |              |                 |                    |              |                 |                    |              |                 |                |              |                 |
| Pooled or summary results (overall rating) |                                                    |                   |              |                 |                    |              |                 |                    |              |                 |                |              |                 |

1  
2  
3  
4  
5  
6  
7  
8  
9  
10  
11  
12  
13  
14  
15  
16  
17  
18  
19  
20  
21  
22  
23  
24  
25  
26  
27  
28  
29  
30  
31  
32  
33  
34  
35  
36  
37  
38  
39  
40  
41  
42  
43  
44  
45  
46  
47

2 C. Summary of Findings Tables

| <i>Structural Validity</i> | <i>Summary or pooled results</i> | <i>Overall rating</i> | <i>Quality of evidence</i> |
|----------------------------|----------------------------------|-----------------------|----------------------------|
| PROM A                     |                                  |                       |                            |
| PROM B                     |                                  |                       |                            |
| PROM C                     |                                  |                       |                            |

| <i>Internal consistency</i> | <i>Summary or pooled results</i> | <i>Overall rating</i> | <i>Quality of evidence</i> |
|-----------------------------|----------------------------------|-----------------------|----------------------------|
| PROM A                      |                                  |                       |                            |
| PROM B                      |                                  |                       |                            |
| PROM C                      |                                  |                       |                            |

| <i>Cross-cultural validity\measurement invariance</i> | <i>Summary or pooled results</i> | <i>Overall rating</i> | <i>Quality of evidence</i> |
|-------------------------------------------------------|----------------------------------|-----------------------|----------------------------|
| PROM A                                                |                                  |                       |                            |
| PROM B                                                |                                  |                       |                            |
| PROM C                                                |                                  |                       |                            |

| <i>Reliability</i> | <i>Summary or pooled results</i> | <i>Overall rating</i> | <i>Quality of evidence</i> |
|--------------------|----------------------------------|-----------------------|----------------------------|
| PROM A             |                                  |                       |                            |
| PROM B             |                                  |                       |                            |
| PROM C             |                                  |                       |                            |

| <i>Measurement Error</i> | <i>Summary or pooled results</i> | <i>Overall rating</i> | <i>Quality of evidence</i> |
|--------------------------|----------------------------------|-----------------------|----------------------------|
| PROM A                   |                                  |                       |                            |
| PROM B                   |                                  |                       |                            |
| PROM C                   |                                  |                       |                            |

1  
2  
3  
4  
5  
6  
7  
8  
9

| <i>Hypothesis testing</i> | <i>Summary or pooled results</i> | <i>Overall rating</i> | <i>Quality of evidence</i> |
|---------------------------|----------------------------------|-----------------------|----------------------------|
| PROM A                    |                                  |                       |                            |
| PROM B                    |                                  |                       |                            |
| PROM C                    |                                  |                       |                            |

10  
11  
12  
13  
14  
15  
16  
17  
18  
19  
20  
21  
22  
23  
24  
25  
26  
27  
28  
29  
30  
31  
32  
33  
34  
35  
36  
37  
38  
39  
40  
41  
42  
43  
44  
45  
46  
47

| <i>Responsiveness</i> | <i>Summary or pooled results</i> | <i>Overall rating</i> | <i>Quality of evidence</i> |
|-----------------------|----------------------------------|-----------------------|----------------------------|
| PROM A                |                                  |                       |                            |
| PROM B                |                                  |                       |                            |
| PROM C                |                                  |                       |                            |

### Supplementary 3 Search Filters

This search filter was adopted from: Terwee CB, Jansma EP, Riphagen II, de Vet HC. Development of a methodological PubMed search filter for finding studies on measurement properties of measurement instruments. Qual Life Res. 2009 Oct;18(8):1115-23. doi: 10.1007/s11136-009-9528-5. Epub 2009 Aug 27. PMID: 19711195; PMCID: PMC2744791.

#### ***Sensitive Filter for Measurement Properties***

("instrumentation" [Subheading]) OR "methods" [Subheading] OR "Validation Stud\*\*"[Publication Type] OR Comparative Study[Publication Type] OR "psychometrics" [MeSH] OR psychometr\*[Title/Abstract] OR clinimetr\*[Text Word] OR clinometr\*[Text Word] OR "Outcome Assessment, Health Care"[Mesh] OR outcome assessment[Title/Abstract] OR outcome measure\*[Text Word] OR "observer variation"[MeSH] OR observer variation[Title/Abstract] OR "Health Status Indicators"[Mesh] OR "reproducibility of results"[MeSH] OR reproducib\*[Title/Abstract] OR "discriminant analysis"[MeSH] OR reliab\*[Title/Abstract] OR unreliab\*[Title/Abstract] OR valid\*[Title/Abstract] OR coefficient[Title/Abstract] OR homogeneity[Title/Abstract] OR homogeneous[Title/Abstract] OR "internal consistency"[Title/Abstract] OR (cronbach\*[Title/Abstract] AND (alpha[Title/Abstract] OR alphas[Title/Abstract])) OR (item[Title/Abstract] AND (correlation\*[Title/Abstract] OR selection\*[Title/Abstract] OR reduction\*[Title/Abstract])) OR agreement[Title/Abstract] OR precision[Title/Abstract] OR imprecision[Title/Abstract] OR "precise values"[Title/Abstract] OR test-retest[Title/Abstract] OR (test[Title/Abstract] AND retest[Title/Abstract]) OR (reliab\* [Title/Abstract] AND (test[Title/Abstract] OR retest[Title/Abstract])) OR stability[Title/Abstract] OR interrater[Title/Abstract] OR inter-rater[Title/Abstract] OR intrarater[Title/Abstract] OR intra-rater[Title/Abstract] OR intertester[Title/Abstract] OR inter-tester[Title/Abstract] OR intratester[Title/Abstract] OR intra-tester[Title/Abstract] OR interobserver[Title/Abstract] OR inter-observer[Title/Abstract] OR intraobserver[Title/Abstract] OR intraobserver[Title/Abstract] OR intertechnician[Title/Abstract] OR inter-technician[Title/Abstract] OR intratechnician[Title/Abstract] OR intra-technician[Title/Abstract] OR interexaminer[Title/Abstract] OR inter-examiner[Title/Abstract] OR intraexaminer[Title/Abstract] OR intra-examiner[Title/Abstract] OR interassay[Title/Abstract] OR inter-assay[Title/Abstract] OR intraassay[Title/Abstract] OR intra-assay[Title/Abstract] OR interindividual[Title/Abstract] OR inter-individual[Title/Abstract] OR intraindividual[Title/Abstract] OR intra-individual[Title/Abstract] OR interparticipant [Title/Abstract] OR inter-participant[Title/Abstract] OR intraparticipant[Title/Abstract] OR intra-participant[Title/Abstract] OR kappa[Title/Abstract] OR kappa's[Title/Abstract] OR kappas[Title/Abstract] OR repeatab\*[Title/Abstract] OR ((replicab\*[Title/Abstract] OR repeated[Title/Abstract]) AND (measure[Title/Abstract] OR measures[Title/Abstract] OR findings[Title/Abstract] OR result[Title/Abstract] OR results[Title/Abstract] OR test[Title/Abstract] OR tests[Title/Abstract])) OR generaliza\*[Title/Abstract] OR generalisa\*[Title/Abstract] OR concordance[Title/Abstract] OR (intraclass[Title/Abstract] AND correlation\*[Title/Abstract]) OR discriminative[Title/Abstract] OR "known group"[Title/Abstract] OR factor analysis[Title/Abstract] OR factor analyses[Title/Abstract] OR dimension\*[Title/Abstract] OR subscale\*[Title/Abstract] OR (multitrait[Title/Abstract] AND scaling[Title/Abstract] AND (analysis[Title/Abstract] OR analyses[Title/Abstract])) OR item discriminant[Title/Abstract] OR interscale correlation\*[Title/Abstract] OR error[Title/Abstract] OR errors[Title/Abstract] OR "individual variability"[Title/Abstract] OR (variability[Title/Abstract] AND (analysis[Title/Abstract] OR values[Title/Abstract])) OR (uncertainty[Title/Abstract] AND (measurement[Title/Abstract] OR measuring[Title/Abstract])) OR "standard error of measurement"[Title/Abstract] OR sensitiv\*[Title/Abstract] OR responsive\*[Title/Abstract] OR ((minimal[Title/Abstract] OR minimally[Title/Abstract] OR clinical[Title/Abstract] OR clinically[Title/Abstract]) AND (important[Title/Abstract] OR significant[Title/Abstract] OR detectable[Title/Abstract])) AND(change[Title/Abstract] OR difference[Title/Abstract])) OR (small\*[Title/Abstract] AND (real[Title/Abstract] OR detectable[Title/Abstract]) AND (change[Title/Abstract] OR difference[Title/Abstract]) OR meaningful change [Title/Abstract] OR "ceiling effect"[Title/Abstract] OR "floor effect"[Title/Abstract] OR "Item response model"[Title/Abstract] OR IRT[Title/Abstract] OR Rasch[Title/Abstract] OR "Differential item functioning"[Title/Abstract] OR DIF[Title/Abstract] OR "computer adaptive testing"[Title/Abstract] OR "item bank"[Title/Abstract] OR "cross-cultural equivalence"[Title/Abstract])

#### ***Exclusion Search Filter***

("address\*\*"[Publication Type] OR "biography"[Publication Type] OR "case reports"[Publication Type] OR "comment"[Publication Type] OR "directory"[Publication Type] OR "editorial"[Publication Type] OR "festschrift"[Publication Type] OR "interview"[Publication Type] OR "lectur\*\*"[Publication Type] OR "legal

1 case\*"[Publication Type] OR "legislation"[Publication Type] OR "letter"[Publication Type] OR  
2 "news"[Publication Type] OR "newspaper article"[Publication Type] OR "patient education handout"[Publication  
3 Type] OR "popular work\*"[Publication Type] OR "congress\*" [Publication Type] OR "consensus development  
4 conference"[ Publication Type] OR "consensus development conference, nih"[Publication Type] OR "practice  
5 guideline"[ Publication Type]) NOT ("animals"[MeSH Terms] NOT "humans"[MeSH Terms])  
6  
7  
8  
9  
10  
11  
12  
13  
14  
15  
16  
17  
18  
19  
20  
21  
22  
23  
24  
25  
26  
27  
28  
29  
30  
31  
32  
33  
34  
35  
36  
37  
38  
39  
40  
41  
42  
43  
44  
45  
46  
47  
48  
49  
50  
51  
52  
53  
54  
55  
56  
57  
58  
59  
60

For peer review only

## Supplementary 4-. Hypotheses for construct validity and responsiveness

Specific MHLS hypotheses for ‘Hypothesis Testing for Construct Validity’ and ‘Responsiveness’

|                                                  |                                                                                                                                                                                                                                                                                                                                                                                                                                                                                                                                                                                                                                                                                                                                                                                                                                                                                                                                                                                                                                                                                                                                                                                                                                                                                                                                                                                                                                                                                                                                                                                                                                                                                                                                                                                                                                                                                                                                                                                                                   |
|--------------------------------------------------|-------------------------------------------------------------------------------------------------------------------------------------------------------------------------------------------------------------------------------------------------------------------------------------------------------------------------------------------------------------------------------------------------------------------------------------------------------------------------------------------------------------------------------------------------------------------------------------------------------------------------------------------------------------------------------------------------------------------------------------------------------------------------------------------------------------------------------------------------------------------------------------------------------------------------------------------------------------------------------------------------------------------------------------------------------------------------------------------------------------------------------------------------------------------------------------------------------------------------------------------------------------------------------------------------------------------------------------------------------------------------------------------------------------------------------------------------------------------------------------------------------------------------------------------------------------------------------------------------------------------------------------------------------------------------------------------------------------------------------------------------------------------------------------------------------------------------------------------------------------------------------------------------------------------------------------------------------------------------------------------------------------------|
| <p>Hypothesis Testing for Construct Validity</p> | <p>Hypothesised <i>a priori</i> that we would observe:</p> <p><b><i>Comparison with other outcome measurement instruments (convergent validity)</i></b></p> <ol style="list-style-type: none"> <li>1. In all populations, strong correlations <math>\geq 0.5</math> will be observed between MHLS and comparator instruments (see Table 2) measuring similar constructs [e.g. Mental health literacy questionnaire-short version for adults (MHLq-SVa)]</li> <li>2. In all populations, medium correlations (<math>\geq 0.30</math> and <math>&lt; 0.50</math>) will be observed between MHLS and instruments (see Table 2) measuring <i>related but dissimilar</i> constructs [e.g. Attitudes Towards Depression (ATD), The Stigmatizing Attitudes-Believability (SAB)]</li> <li>3. In all populations, weak correlations (<math>&lt; 0.3</math>) will be observed between MHLS and instruments (see Table 2) measuring a <i>separate</i> construct (instruments that do not measure MHL) [e.g. The 12-item General Health Questionnaire (GHQ-12), My lifestyle questionnaire (MLQ)].</li> </ol> <p><b><i>Comparison between subgroups (Divergent validity)</i></b></p> <p>MHLS scores should be able to distinguish between the following groups, with statistically significant differences between the groups:</p> <ul style="list-style-type: none"> <li>• <b>Alternative Hypothesis 1:</b> younger vs. older age groups, with older groups having higher MHL.</li> <li>• <b>Alternative Hypothesis 2:</b> males vs. females, with females having higher MHL.</li> <li>• <b>Alternative Hypothesis 3:</b> those who have direct experience with mental disorders vs. those who do not, with those having direct experience with mental disorders having higher MHL.</li> <li>• <b>Alternative Hypothesis 4:</b> those who have indirect experience with mental disorders (family or friends) vs. those who do not, with those having indirect experience with mental disorders having higher MHL.</li> </ul> |
|--------------------------------------------------|-------------------------------------------------------------------------------------------------------------------------------------------------------------------------------------------------------------------------------------------------------------------------------------------------------------------------------------------------------------------------------------------------------------------------------------------------------------------------------------------------------------------------------------------------------------------------------------------------------------------------------------------------------------------------------------------------------------------------------------------------------------------------------------------------------------------------------------------------------------------------------------------------------------------------------------------------------------------------------------------------------------------------------------------------------------------------------------------------------------------------------------------------------------------------------------------------------------------------------------------------------------------------------------------------------------------------------------------------------------------------------------------------------------------------------------------------------------------------------------------------------------------------------------------------------------------------------------------------------------------------------------------------------------------------------------------------------------------------------------------------------------------------------------------------------------------------------------------------------------------------------------------------------------------------------------------------------------------------------------------------------------------|

|                |                                                                                                                                                                                                                                                                                                                                                                                                                                                                   |
|----------------|-------------------------------------------------------------------------------------------------------------------------------------------------------------------------------------------------------------------------------------------------------------------------------------------------------------------------------------------------------------------------------------------------------------------------------------------------------------------|
|                | <ul style="list-style-type: none"> <li>• <b>Alternative Hypothesis 5:</b> Those with low SES vs. high SES. With those with high SES having higher MHL.</li> <li>• <b>Alternative Hypothesis 6:</b> Those with low education levels vs. high education levels, with those with higher education having higher MHL.</li> </ul>                                                                                                                                      |
| Responsiveness | <p>Hypothesized <i>a priori</i> that we would observe:</p> <p><b>Before and After Intervention:</b></p> <p>A. <b>Null hypothesis:</b> In response to an educational intervention, we expect no difference in MHLS scores in the intervention and control groups.</p> <p>B. <b>Alternative hypothesis:</b> In response to an educational intervention, we expect a statistically significant difference in MHLS scores in the intervention and control groups.</p> |

1. O'Connor M, Casey L. The Mental Health Literacy Scale (MHLS): A new scale-based measure of mental health literacy. *Psychiatry Res.* 2015 Sep 30;229(1–2):511–6.
2. Terwee CB, Jansma EP, Riphagen II, de Vet HCW. Development of a methodological PubMed search filter for finding studies on measurement properties of measurement instruments. *Qual Life Res.* 2009 Oct 1;18(8):1115–23.
3. Stephenson M, Riitano D, Wilson S, Leonardi-Bee J, Mabire C, Cooper K, et al. Chapter 12: Systematic reviews of measurement properties. In: *JBIManual for Evidence Synthesis* [Internet]. JBI; 2020 [cited 2023 Sep 10]. Available from: <https://jbi-global-wiki.refined.site/space/MANUAL/4686202/Chapter+12%3A+Systematic+reviews+of+measurement+properties>



**PRISMA-P (Preferred Reporting Items for Systematic review and Meta-Analysis Protocols) 2015 checklist: recommended items to address in a systematic review protocol\***

Title: **Measurement properties of mental health literacy scale (MHLS) validation studies: a systematic review protocol**

| Section and topic                 | Item No | Checklist item                                                                                                                                                                                                                | Reported on Page number                             |
|-----------------------------------|---------|-------------------------------------------------------------------------------------------------------------------------------------------------------------------------------------------------------------------------------|-----------------------------------------------------|
| <b>ADMINISTRATIVE INFORMATION</b> |         |                                                                                                                                                                                                                               |                                                     |
| Title:                            |         |                                                                                                                                                                                                                               |                                                     |
| Identification                    | 1a      | Identify the report as a protocol of a systematic review                                                                                                                                                                      | Page 1                                              |
| Update                            | 1b      | If the protocol is for an update of a previous systematic review, identify as such                                                                                                                                            | NA                                                  |
| Registration                      | 2       | If registered, provide the name of the registry (such as PROSPERO) and registration number                                                                                                                                    | In the abstract on page 2 & under methods on page 5 |
| Authors:                          |         |                                                                                                                                                                                                                               |                                                     |
| Contact                           | 3a      | Provide name, institutional affiliation, e-mail address of all protocol authors; provide physical mailing address of corresponding author                                                                                     | Page 1                                              |
| Contributions                     | 3b      | Describe contributions of protocol authors and identify the guarantor of the review                                                                                                                                           | Line 368, page 12                                   |
| Amendments                        | 4       | If the protocol represents an amendment of a previously completed or published protocol, identify as such and list changes; otherwise, state plan for documenting important protocol amendments                               | NA                                                  |
| Support:                          |         |                                                                                                                                                                                                                               |                                                     |
| Sources                           | 5a      | Indicate sources of financial or other support for the review                                                                                                                                                                 | Page 13                                             |
| Sponsor                           | 5b      | Provide name for the review funder and/or sponsor                                                                                                                                                                             | Page 13                                             |
| Role of sponsor or funder         | 5c      | Describe roles of funder(s), sponsor(s), and/or institution(s), if any, in developing the protocol                                                                                                                            | Page 13                                             |
| <b>INTRODUCTION</b>               |         |                                                                                                                                                                                                                               |                                                     |
| Rationale                         | 6       | Describe the rationale for the review in the context of what is already known                                                                                                                                                 | Line 152, page 4                                    |
| Objectives                        | 7       | Provide an explicit statement of the question(s) the review will address with reference to participants, interventions, comparators, and outcomes (PICO)                                                                      | Line 162, page 4                                    |
| <b>METHODS</b>                    |         |                                                                                                                                                                                                                               |                                                     |
| Eligibility criteria              | 8       | Specify the study characteristics (such as PICO, study design, setting, time frame) and report characteristics (such as years considered, language, publication status) to be used as criteria for eligibility for the review | Line 214, page 6                                    |
| Information sources               | 9       | Describe all intended information sources (such as electronic databases, contact with study authors, trial registers or other grey literature sources) with planned dates of coverage                                         | Line 193, page 5                                    |
| Search strategy                   | 10      | Present draft of search strategy to be used for at least one electronic database, including planned limits, such that it could be repeated                                                                                    | Supplement 1                                        |

|                 |     |                                                                                              |                                                                                            |
|-----------------|-----|----------------------------------------------------------------------------------------------|--------------------------------------------------------------------------------------------|
| Study records:  |     |                                                                                              |                                                                                            |
| Data management | 11a | Describe the mechanism(s) that will be used to manage records and data throughout the review | Using Covidence (line 228, page 6 ) and using COSMIN Excel spreadsheets (Line 250, Page 8) |

For peer review only

|                                    |     |                                                                                                                                                                                                                                                  |          |
|------------------------------------|-----|--------------------------------------------------------------------------------------------------------------------------------------------------------------------------------------------------------------------------------------------------|----------|
| Selection process                  | 11b | State the process that will be used for selecting studies (such as two independent reviewers) through each phase of the review (that is, screening, eligibility and inclusion in meta-analysis)                                                  | Page 5   |
| Data collection process            | 11c | Describe planned method of extracting data from reports (such as piloting forms, done independently, in duplicate), any processes for obtaining and confirming data from investigators                                                           | Page 6   |
| Data items                         | 12  | List and define all variables for which data will be sought (such as PICO items, funding sources), any pre-planned data assumptions and simplifications                                                                                          | Page 6   |
| Outcomes and prioritization        | 13  | List and define all outcomes for which data will be sought, including prioritization of main and additional outcomes, with rationale                                                                                                             | Page 7   |
| Risk of bias in individual studies | 14  | Describe anticipated methods for assessing risk of bias of individual studies, including whether this will be done at the outcome or study level, or both; state how this information will be used in data synthesis                             | Page 6-7 |
| Data synthesis                     | 15a | Describe criteria under which study data will be quantitatively synthesised                                                                                                                                                                      | Page 8   |
|                                    | 15b | If data are appropriate for quantitative synthesis, describe planned summary measures, methods of handling data and methods of combining data from studies, including any planned exploration of consistency (such as $I^2$ , Kendall's $\tau$ ) | Page 8   |
|                                    | 15c | Describe any proposed additional analyses (such as sensitivity or subgroup analyses, meta-regression)                                                                                                                                            | NA       |
|                                    | 15d | If quantitative synthesis is not appropriate, describe the type of summary planned                                                                                                                                                               | Page 8   |
| Meta-bias(es)                      | 16  | Specify any planned assessment of meta-bias(es) (such as publication bias across studies, selective reporting within studies)                                                                                                                    | Page 9   |
| Confidence in cumulative evidence  | 17  | Describe how the strength of the body of evidence will be assessed (such as GRADE)                                                                                                                                                               | Page 9   |

**\* It is strongly recommended that this checklist be read in conjunction with the PRISMA-P Explanation and Elaboration (cite when available) for important clarification on the items. Amendments to a review protocol should be tracked and dated. The copyright for PRISMA-P (including checklist) is held by the PRISMA-P Group and is distributed under a Creative Commons Attribution Licence 4.0.**

*From: Shamseer L, Moher D, Clarke M, Ghersi D, Liberati A, Petticrew M, Shekelle P, Stewart L, PRISMA-P Group. Preferred reporting items for systematic review and meta-analysis protocols (PRISMA-P) 2015: elaboration and explanation. BMJ. 2015 Jan 2;349(jan02 1):g7647.*
