# Supplementary material for: Measurement properties of the Mental Health Literacy Scale (MHLS) validation studies: a systematic review protocol
Source: PubMed Central journal article supplement — BMJ Open. 2024 Apr 2;14(4):e081394. doi: 10.1136/bmjopen-2023-081394 (PMC10989124; doi:10.1136/bmjopen-2023-081394), 2024-04-02
Supplement: bmjopen-2023-081394supp001.pdf [file bmjopen-2023-081394supp001.pdf]

**Title:** Measurement properties of the Mental Health Literacy Scale (MHLS) validation studies: a systematic review protocol

**Supplementary file**

| <b>Content list</b>                                                                                                                                                                                                       | <b>Page</b> |
|---------------------------------------------------------------------------------------------------------------------------------------------------------------------------------------------------------------------------|-------------|
| Supplementary 1A Search Filters<br><i>Supplementary 1AI -Sensitive Filter for Measurement Properties</i><br><i>Supplementary 1AII -Exclusion Search Filter</i>                                                            | 1           |
| Supplementary 1B Search Strategies                                                                                                                                                                                        | 4           |
| Supplementary 1C Data Charting Instruments<br><i>1C I. Descriptive Characteristics of The Included Studies</i><br><i>1C II. Results of Studies on Measurement Properties</i><br><i>1C III. Summary of Findings Tables</i> | 9           |
| Supplementary 1D Hypotheses for construct validity and responsiveness                                                                                                                                                     | 13          |

## Supplementary 1A Search Filters

This search filter was adopted from: Terwee CB, Jansma EP, Riphagen II, de Vet HC. Development of a methodological PubMed search filter for finding studies on measurement properties of measurement instruments. *Qual Life Res.* 2009 Oct;18(8):1115-23. doi: 10.1007/s11136-009-9528-5. Epub 2009 Aug 27. PMID: 19711195; PMCID: PMC2744791.

### *Supplementary 1AI -Sensitive Filter for Measurement Properties*

("instrumentation" [Subheading]) OR "methods" [Subheading] OR "Validation Stud\*" [Publication Type] OR Comparative Study [Publication Type] OR "psychometrics" [MeSH] OR psychometr\* [Title/Abstract] OR clinimetr\* [Text Word] OR clinometr\* [Text Word] OR "Outcome Assessment, Health Care" [Mesh] OR outcome assessment [Title/Abstract] OR outcome measure\* [Text Word] OR "observer variation" [MeSH] OR observer variation [Title/Abstract] OR "Health Status Indicators" [Mesh] OR "reproducibility of results" [MeSH] OR reproducib\* [Title/Abstract] OR "discriminant analysis" [MeSH] OR reliab\* [Title/Abstract] OR unreliab\* [Title/Abstract] OR valid\* [Title/Abstract] OR coefficient [Title/Abstract] OR homogeneity [Title/Abstract] OR homogeneous [Title/Abstract] OR "internal consistency" [Title/Abstract] OR (cronbach\* [Title/Abstract] AND (alpha [Title/Abstract] OR alphas [Title/Abstract])) OR (item [Title/Abstract] AND (correlation\* [Title/Abstract] OR selection\* [Title/Abstract] OR reduction\* [Title/Abstract])) OR agreement [Title/Abstract] OR precision [Title/Abstract] OR imprecision [Title/Abstract] OR "precise values" [Title/Abstract] OR test- retest [Title/Abstract] OR (test [Title/Abstract] AND retest [Title/Abstract]) OR (reliab\* [Title/Abstract] AND (test [Title/Abstract] OR retest [Title/Abstract])) OR stability [Title/Abstract] OR interrater [Title/Abstract] OR inter-rater [Title/Abstract] OR intrarater [Title/Abstract] OR intra-rater [Title/Abstract] OR intertester [Title/Abstract] OR inter-tester [Title/Abstract] OR intratester [Title/Abstract] OR intra-tester [Title/Abstract] OR interobserver [Title/Abstract] OR inter-observer [Title/Abstract] OR intraobserver [Title/Abstract] OR intraobserver [Title/Abstract] OR intertechnician [Title/Abstract] OR inter-technician [Title/Abstract] OR intratechnician [Title/Abstract] OR intra-technician [Title/Abstract] OR interexaminer [Title/Abstract] OR inter-examiner [Title/Abstract] OR intraexaminer [Title/Abstract] OR intra-examiner [Title/Abstract] OR interassay [Title/Abstract] OR inter-assay [Title/Abstract] OR intraassay [Title/Abstract] OR intra-assay [Title/Abstract] OR interindividual [Title/Abstract] OR inter-individual [Title/Abstract] OR intraindividual [Title/Abstract] OR intra-individual [Title/Abstract] OR interparticipant [Title/Abstract] OR inter-participant [Title/Abstract] OR intraparticipant [Title/Abstract] OR intra-participant [Title/Abstract] OR kappa [Title/Abstract] OR kappa's [Title/Abstract] OR kappas [Title/Abstract] OR repeatab\* [Title/Abstract] OR ((replicab\* [Title/Abstract] OR repeated [Title/Abstract]) AND (measure [Title/Abstract] OR measures [Title/Abstract] OR findings [Title/Abstract] OR result [Title/Abstract] OR results [Title/Abstract] OR test [Title/Abstract] OR tests [Title/Abstract])) OR generaliza\* [Title/Abstract] OR generalisa\* [Title/Abstract] OR concordance [Title/Abstract] OR (intraclass [Title/Abstract] AND correlation\* [Title/Abstract]) OR discriminative [Title/Abstract] OR "known group" [Title/Abstract] OR factor analysis [Title/Abstract] OR factor analyses [Title/Abstract] OR dimension\* [Title/Abstract] OR subscale\* [Title/Abstract] OR (multitrait [Title/Abstract] AND scaling [Title/Abstract] AND (analysis [Title/Abstract] OR analyses [Title/Abstract])) OR item discriminant [Title/Abstract] OR interscale correlation\* [Title/Abstract] OR error [Title/Abstract] OR errors [Title/Abstract] OR "individual variability" [Title/Abstract] OR

(variability[Title/Abstract] AND (analysis[Title/Abstract] OR values[ Title/Abstract])) OR (uncertainty[Title/Abstract] AND (measurement[Title/Abstract] OR measuring[Title/Abstract])) OR “standard error of measurement”[ Title/Abstract] OR sensitiv\*[Title/Abstract] OR responsive\*[Title/Abstract] OR ((minimal[Title/Abstract] OR minimally[Title/Abstract] OR clinical[Title/Abstract] OR clinically[Title/Abstract]) AND (important[Title/Abstract] OR significant[Title/Abstract] OR detectable[Title/Abstract]) AND(change[Title/Abstract] OR difference[Title/Abstract])) OR (small\*[Title/Abstract] AND (real[Title/Abstract] OR detectable[Title/Abstract]) AND (change[Title/Abstract] OR difference[Title/Abstract]) OR meaningful change [Title/Abstract] OR “ceiling effect”[Title/Abstract] OR “floor effect”[Title/Abstract] OR “Item response model”[Title/Abstract] OR IRT[Title/Abstract] OR Rasch[Title/Abstract] OR “Differential item functioning”[Title/Abstract] OR DIF[Title/Abstract] OR “computer adaptive testing”[Title/Abstract] OR “item bank”[Title/Abstract] OR “cross-cultural equivalence”[Title/Abstract])

***Supplementary 1AII -Exclusion Search Filter***

(“address\*”[Publication Type] OR “biography”[Publication Type] OR “case reports”[Publication Type] OR “comment”[Publication Type] OR “directory”[Publication Type] OR “editorial”[Publication Type] OR “festschrift”[ Publication Type] OR “interview”[Publication Type] OR “lectur\*”[Publication Type] OR “legal case\*”[Publication Type] OR “legislation”[Publication Type] OR “letter”[Publication Type] OR “news”[Publication Type] OR “newspaper article”[Publication Type] OR “patient education handout”[Publication Type] OR “popular work\*”[Publication Type] OR “congress\*” [Publication Type] OR “consensus development conference”[ Publication Type] OR “consensus development conference, nih”[Publication Type] OR “practice guideline”[ Publication Type]) NOT (“animals”[MeSH Terms] NOT “humans”[MeSH Terms])

## Supplementary 1B Search Strategies

| 1.1. Search for PubMed |                                                             |                                                                                                                                                                                                                                                                                                                                                                                                                                                                                                                                                                                                                                                                                                                                                                                                                                                                                                                                                                                                                                                                                                                                                                                                                                                                                                                                                                                                      |
|------------------------|-------------------------------------------------------------|------------------------------------------------------------------------------------------------------------------------------------------------------------------------------------------------------------------------------------------------------------------------------------------------------------------------------------------------------------------------------------------------------------------------------------------------------------------------------------------------------------------------------------------------------------------------------------------------------------------------------------------------------------------------------------------------------------------------------------------------------------------------------------------------------------------------------------------------------------------------------------------------------------------------------------------------------------------------------------------------------------------------------------------------------------------------------------------------------------------------------------------------------------------------------------------------------------------------------------------------------------------------------------------------------------------------------------------------------------------------------------------------------|
|                        | <i>Population Search</i>                                    | This search did not include a population search since there is no restriction on population type, age and settings                                                                                                                                                                                                                                                                                                                                                                                                                                                                                                                                                                                                                                                                                                                                                                                                                                                                                                                                                                                                                                                                                                                                                                                                                                                                                   |
| #1                     | <i>Instrument Search<br/>MHLS O'Conner and Casey (2015)</i> | ("mental health literacy scale*") OR (MHLS)                                                                                                                                                                                                                                                                                                                                                                                                                                                                                                                                                                                                                                                                                                                                                                                                                                                                                                                                                                                                                                                                                                                                                                                                                                                                                                                                                          |
| #2                     | <i>Construct search mental health literacy</i>              | ("mental health"[Title/Abstract] OR "mental health"[Title/Abstract] OR "mental health"[MeSH Terms] OR "mental stabilit*" [Title/Abstract] OR "mental balanc*" [Title/Abstract] OR "mental hygien*" [Title/Abstract] OR "sanit*" [Title/Abstract] OR "psychiatr*" [Title/Abstract] OR "life disrupt*" [Title/Abstract] OR "mental ill*" [Title/Abstract] OR "mental ill*" [Title/Abstract] OR "mental disord*" [Title/Abstract] OR "mental wellbeing*" [Title/Abstract] OR "mental well being*" [Title/Abstract] OR "mental condition*" [Title/Abstract] OR "Mental Disorders"[MeSH Terms]) AND ("Health Literacy"[MeSH Terms] OR "health literac*" [Title/Abstract] OR "health education*" [Title/Abstract] OR "health train*" [Title/Abstract] OR "health aware*" [Title/Abstract])                                                                                                                                                                                                                                                                                                                                                                                                                                                                                                                                                                                                                 |
| #3                     | <i>Filter for measurement properties</i>                    | ("instrumentation" [Subheading]) OR "methods" [Subheading] OR "Validation Stud*" [Publication Type] OR Comparative Study [Publication Type] OR "psychometrics" [MeSH] OR psychometr* [Title/Abstract] OR clinimetr* [Text Word] OR clinometr* [Text Word] OR "Outcome Assessment, Health Care" [Mesh] OR outcome assessment [Title/Abstract] OR outcome measure* [Text Word] OR "observer variation" [MeSH] OR observer variation [Title/Abstract] OR "Health Status Indicators" [Mesh] OR "reproducibility of results" [MeSH] OR reproducib* [Title/Abstract] OR "discriminant analysis" [MeSH] OR reliab* [Title/Abstract] OR unreliab* [Title/Abstract] OR valid* [Title/Abstract] OR coefficient [Title/Abstract] OR homogeneity [Title/Abstract] OR homogeneous [Title/Abstract] OR "internal consistency" [Title/Abstract] OR (cronbach* [Title/Abstract] AND (alpha [Title/Abstract] OR alphas [Title/Abstract])) OR (item [Title/Abstract] AND (correlation* [Title/Abstract] OR selection* [Title/Abstract] OR reduction* [Title/Abstract])) OR agreement [Title/Abstract] OR precision [Title/Abstract] OR imprecision [Title/Abstract] OR "precise values" [Title/Abstract] OR test- retest [Title/Abstract] OR (test [Title/Abstract] AND retest [Title/Abstract]) OR (reliab* [Title/Abstract] AND (test [Title/Abstract] OR retest [Title/Abstract])) OR stability [Title/Abstract] OR |

|  |                                                                                                                                                                                                                                                                                                                                                                                                                                                                                                                                                                                                                                                                                                                                                                                                                                                                                                                                                                                                                                                                                                                                                                                                                                                                                                                                                                                                                                                                                                                                                                                                                                                                                                                                                                                                                                                                                                                                                                                                                                                                                                                                                                                                                                                                                                                                                                                                                                                                                                                                                                                                                                                                                                                                                                                                                                                                                                                                                                                                                                                                                                                                                 |
|--|-------------------------------------------------------------------------------------------------------------------------------------------------------------------------------------------------------------------------------------------------------------------------------------------------------------------------------------------------------------------------------------------------------------------------------------------------------------------------------------------------------------------------------------------------------------------------------------------------------------------------------------------------------------------------------------------------------------------------------------------------------------------------------------------------------------------------------------------------------------------------------------------------------------------------------------------------------------------------------------------------------------------------------------------------------------------------------------------------------------------------------------------------------------------------------------------------------------------------------------------------------------------------------------------------------------------------------------------------------------------------------------------------------------------------------------------------------------------------------------------------------------------------------------------------------------------------------------------------------------------------------------------------------------------------------------------------------------------------------------------------------------------------------------------------------------------------------------------------------------------------------------------------------------------------------------------------------------------------------------------------------------------------------------------------------------------------------------------------------------------------------------------------------------------------------------------------------------------------------------------------------------------------------------------------------------------------------------------------------------------------------------------------------------------------------------------------------------------------------------------------------------------------------------------------------------------------------------------------------------------------------------------------------------------------------------------------------------------------------------------------------------------------------------------------------------------------------------------------------------------------------------------------------------------------------------------------------------------------------------------------------------------------------------------------------------------------------------------------------------------------------------------------|
|  | <p> inter-rater[Title/Abstract] OR inter-rater[Title/Abstract] OR<br/> intra-rater[Title/Abstract] OR intra-rater[Title/Abstract] OR<br/> inter-tester[Title/Abstract] OR inter-tester[Title/Abstract] OR<br/> intra-tester[Title/Abstract] OR intra-tester[Title/Abstract] OR<br/> inter-observer[Title/Abstract] OR inter-observer[Title/Abstract]<br/> OR intra-observer[Title/Abstract] OR intra-observer[Title/Abstract] OR<br/> inter-technician[Title/Abstract] OR inter-technician[Title/Abstract] OR<br/> intra-technician[Title/Abstract] OR intra-technician[Title/Abstract] OR<br/> inter-examiner[Title/Abstract] OR inter-examiner[Title/Abstract] OR<br/> intra-examiner[Title/Abstract] OR intra-examiner[Title/Abstract] OR<br/> inter-assay[Title/Abstract] OR inter-assay[Title/Abstract] OR<br/> intra-assay[Title/Abstract] OR intra-assay[Title/Abstract] OR<br/> inter-individual[Title/Abstract] OR inter-individual[Title/Abstract] OR<br/> intra-individual[Title/Abstract] OR intra-individual[Title/Abstract] OR<br/> inter-participant[Title/Abstract] OR inter-participant[Title/Abstract] OR<br/> intra-participant[Title/Abstract] OR intra-participant[Title/Abstract] OR<br/> kappa[Title/Abstract] OR kappa's[Title/Abstract] OR kappas[Title/Abstract] OR<br/> repeatability[Title/Abstract] OR ((repeatability[Title/Abstract] OR<br/> repeated[Title/Abstract]) AND (measure[Title/Abstract] OR<br/> measures[Title/Abstract] OR findings[Title/Abstract] OR<br/> result[Title/Abstract] OR results[Title/Abstract] OR<br/> test[Title/Abstract] OR tests[Title/Abstract])) OR<br/> generalizability[Title/Abstract] OR generalizability[Title/Abstract] OR<br/> concordance[Title/Abstract] OR (intraclass[Title/Abstract] AND<br/> correlation*[Title/Abstract]) OR discriminative[Title/Abstract]<br/> OR "known group"[Title/Abstract] OR factor<br/> analysis[Title/Abstract] OR factor analyses[Title/Abstract] OR<br/> dimensionality[Title/Abstract] OR subscale*[Title/Abstract] OR<br/> (multitrait[Title/Abstract] AND scaling[Title/Abstract] AND<br/> (analysis[Title/Abstract] OR analyses[Title/Abstract])) OR item<br/> discriminant[Title/Abstract] OR interscale<br/> correlation*[Title/Abstract] OR error[Title/Abstract] OR<br/> errors[Title/Abstract] OR "individual variability"[Title/Abstract]<br/> OR (variability[Title/Abstract] AND<br/> (analysis[Title/Abstract] OR values[Title/Abstract])) OR<br/> (uncertainty[Title/Abstract] AND (measurement[Title/Abstract]<br/> OR measuring[Title/Abstract])) OR "standard error of<br/> measurement"[Title/Abstract] OR sensitiveness*[Title/Abstract] OR<br/> responsive*[Title/Abstract] OR ((minimal[Title/Abstract] OR<br/> minimally[Title/Abstract] OR clinically[Title/Abstract] OR<br/> clinically[Title/Abstract]) AND (important[Title/Abstract] OR<br/> significant[Title/Abstract] OR detectable[Title/Abstract])<br/> AND(change[Title/Abstract] OR difference[Title/Abstract])) OR<br/> (small*[Title/Abstract] AND (real[Title/Abstract] OR<br/> detectable[Title/Abstract]) AND (change[Title/Abstract] OR </p> |
|--|-------------------------------------------------------------------------------------------------------------------------------------------------------------------------------------------------------------------------------------------------------------------------------------------------------------------------------------------------------------------------------------------------------------------------------------------------------------------------------------------------------------------------------------------------------------------------------------------------------------------------------------------------------------------------------------------------------------------------------------------------------------------------------------------------------------------------------------------------------------------------------------------------------------------------------------------------------------------------------------------------------------------------------------------------------------------------------------------------------------------------------------------------------------------------------------------------------------------------------------------------------------------------------------------------------------------------------------------------------------------------------------------------------------------------------------------------------------------------------------------------------------------------------------------------------------------------------------------------------------------------------------------------------------------------------------------------------------------------------------------------------------------------------------------------------------------------------------------------------------------------------------------------------------------------------------------------------------------------------------------------------------------------------------------------------------------------------------------------------------------------------------------------------------------------------------------------------------------------------------------------------------------------------------------------------------------------------------------------------------------------------------------------------------------------------------------------------------------------------------------------------------------------------------------------------------------------------------------------------------------------------------------------------------------------------------------------------------------------------------------------------------------------------------------------------------------------------------------------------------------------------------------------------------------------------------------------------------------------------------------------------------------------------------------------------------------------------------------------------------------------------------------------|

|    |                               |                                                                                                                                                                                                                                                                                                                                                                                                                                                                                                                                                                                                                                                                                                                                                                                                                                                                                                                                                                                                                                                                                                                                                                                                                                                                                                                                                                                           |
|----|-------------------------------|-------------------------------------------------------------------------------------------------------------------------------------------------------------------------------------------------------------------------------------------------------------------------------------------------------------------------------------------------------------------------------------------------------------------------------------------------------------------------------------------------------------------------------------------------------------------------------------------------------------------------------------------------------------------------------------------------------------------------------------------------------------------------------------------------------------------------------------------------------------------------------------------------------------------------------------------------------------------------------------------------------------------------------------------------------------------------------------------------------------------------------------------------------------------------------------------------------------------------------------------------------------------------------------------------------------------------------------------------------------------------------------------|
|    |                               | difference[Title/Abstract]) OR meaningful change [Title/Abstract] OR “ceiling effect”[Title/Abstract] OR “floor effect”[Title/Abstract] OR “Item response model”[Title/Abstract] OR IRT[Title/Abstract] OR Rasch[Title/Abstract] OR “Differential item functioning”[Title/Abstract] OR DIF[Title/Abstract] OR “computer adaptive testing”[Title/Abstract] OR “item bank”[Title/Abstract] OR “cross-cultural equivalence”[Title/Abstract])                                                                                                                                                                                                                                                                                                                                                                                                                                                                                                                                                                                                                                                                                                                                                                                                                                                                                                                                                 |
| #4 | <i>Exclusion filter</i>       | (“address*”[Publication Type] OR “biography”[Publication Type] OR “case reports”[Publication Type] OR “comment”[Publication Type] OR “directory”[Publication Type] OR “editorial”[Publication Type] OR “festschrift”[Publication Type] OR “interview”[Publication Type] OR “lectur*”[Publication Type] OR “legal case*”[Publication Type] OR “legislation”[Publication Type] OR “letter”[Publication Type] OR “news”[Publication Type] OR “newspaper article”[Publication Type] OR “patient education handout”[Publication Type] OR “popular work*”[Publication Type] OR “congress*” [Publication Type] OR “consensus development conference”[ Publication Type] OR “consensus development conference, nih”[Publication Type] OR “practice guideline”[ Publication Type]) NOT (“animals”[MeSH Terms] NOT “humans”[MeSH Terms])                                                                                                                                                                                                                                                                                                                                                                                                                                                                                                                                                            |
| #5 | <i>#1 AND #2 AND #3 NOT#4</i> | ((("mental health"[Title/Abstract] OR "mental health"[Title/Abstract] OR "mental health"[MeSH Terms] OR "mental stabilit*" [Title/Abstract] OR "mental balanc*" [Title/Abstract] OR "mental hygien*" [Title/Abstract] OR "sanit*" [Title/Abstract] OR "psychiatr*" [Title/Abstract] OR "life disrupt*" [Title/Abstract] OR "mental ill*" [Title/Abstract] OR "mental ill*" [Title/Abstract] OR "mental disord*" [Title/Abstract] OR "mental wellbeing*" [Title/Abstract] OR "mental well being*" [Title/Abstract] OR "mental condition*" [Title/Abstract] OR "Mental Disorders"[MeSH Terms]) AND ("Health Literacy"[MeSH Terms] OR "health literac*" [Title/Abstract] OR "health education*" [Title/Abstract] OR "health train*" [Title/Abstract] OR "health aware*" [Title/Abstract])) AND (("instrumentation" [Subheading]) OR "methods" [Subheading] OR "Validation Stud*" [Publication Type] OR Comparative Study[Publication Type] OR “psychometrics” [MeSH] OR psychometr* [Title/Abstract] OR clinimetr* [Text Word] OR clinometr* [Text Word] OR "Outcome Assessment, Health Care"[Mesh] OR outcome assessment[Title/Abstract] OR outcome measure* [Text Word] OR “observer variation” [MeSH] OR observer variation[Title/Abstract] OR “Health Status Indicators” [Mesh] OR “reproducibility of results” [MeSH] OR reproducib* [Title/Abstract] OR “discriminant analysis” [MeSH] |

|  |  |                                                                                                                                                                                                                                                                                                                                                                                                                                                                                                                                                                                                                                                                                                                                                                                                                                                                                                                                                                                                                                                                                                                                                                                                                                                                                                                                                                                                                                                                                                                                                                                                                                                                                                                                                                                                                                                                                                                                                                                                                                                                                                                                                                                                                                                                                                                                                                                                                                                                                                                                                                                                                                                                                                                                                                                                                                                                    |
|--|--|--------------------------------------------------------------------------------------------------------------------------------------------------------------------------------------------------------------------------------------------------------------------------------------------------------------------------------------------------------------------------------------------------------------------------------------------------------------------------------------------------------------------------------------------------------------------------------------------------------------------------------------------------------------------------------------------------------------------------------------------------------------------------------------------------------------------------------------------------------------------------------------------------------------------------------------------------------------------------------------------------------------------------------------------------------------------------------------------------------------------------------------------------------------------------------------------------------------------------------------------------------------------------------------------------------------------------------------------------------------------------------------------------------------------------------------------------------------------------------------------------------------------------------------------------------------------------------------------------------------------------------------------------------------------------------------------------------------------------------------------------------------------------------------------------------------------------------------------------------------------------------------------------------------------------------------------------------------------------------------------------------------------------------------------------------------------------------------------------------------------------------------------------------------------------------------------------------------------------------------------------------------------------------------------------------------------------------------------------------------------------------------------------------------------------------------------------------------------------------------------------------------------------------------------------------------------------------------------------------------------------------------------------------------------------------------------------------------------------------------------------------------------------------------------------------------------------------------------------------------------|
|  |  | <p>OR reliab*[Title/Abstract] OR unreliab*[Title/Abstract] OR valid*[Title/Abstract] OR coefficient[Title/Abstract] OR homogeneity[Title/Abstract] OR homogeneous[Title/Abstract] OR “internal consistency”[Title/Abstract] OR (cronbach*[Title/Abstract] AND (alpha[Title/Abstract] OR alphas[Title/Abstract])) OR (item[Title/Abstract] AND (correlation*[Title/Abstract] OR selection*[Title/Abstract] OR reduction*[Title/Abstract])) OR agreement[Title/Abstract] OR precision[Title/Abstract] OR imprecision[Title/Abstract] OR “precise values”[Title/Abstract] OR test– retest[Title/Abstract] OR (test[Title/Abstract] AND retest[Title/Abstract]) OR (reliab*[Title/Abstract] AND (test[Title/Abstract] OR retest[Title/Abstract])) OR stability[Title/Abstract] OR interrater[Title/Abstract] OR inter-rater[Title/Abstract] OR intrarater[Title/Abstract] OR intra-rater[Title/Abstract] OR intertester[Title/Abstract] OR inter-tester[Title/Abstract] OR intratester[Title/Abstract] OR intra-tester[Title/Abstract] OR interobserver[Title/Abstract] OR inter-observer[Title/Abstract] OR intraobserver[Title/Abstract] OR intraobserver[Title/Abstract] OR intertechnician[Title/Abstract] OR inter-technician[Title/Abstract] OR intratechnician[Title/Abstract] OR intra-technician[Title/Abstract] OR interexaminer[Title/Abstract] OR inter-examiner[Title/Abstract] OR intraexaminer[Title/Abstract] OR intra-examiner[Title/Abstract] OR interassay[Title/Abstract] OR inter-assay[Title/Abstract] OR intraassay[Title/Abstract] OR intra-assay[Title/Abstract] OR interindividual[Title/Abstract] OR inter-individual[Title/Abstract] OR intraindividual[Title/Abstract] OR intra-individual[Title/Abstract] OR interparticipant[Title/Abstract] OR inter-participant[Title/Abstract] OR intraparticipant[Title/Abstract] OR intra-participant[Title/Abstract] OR kappa[Title/Abstract] OR kappa’s[Title/Abstract] OR kappas[Title/Abstract] OR repeatab*[Title/Abstract] OR ((replicab*[Title/Abstract] OR repeated[Title/Abstract]) AND (measure[Title/Abstract] OR measures[Title/Abstract] OR findings[Title/Abstract] OR result[Title/Abstract] OR results[Title/Abstract] OR test[Title/Abstract] OR tests[Title/Abstract])) OR generaliza*[Title/Abstract] OR generalisa*[Title/Abstract] OR concordance[Title/Abstract] OR (intraclass[Title/Abstract] AND correlation*[Title/Abstract]) OR discriminative[Title/Abstract] OR “known group”[Title/Abstract] OR factor analysis[Title/Abstract] OR factor analyses[Title/Abstract] OR dimension*[Title/Abstract] OR subscale*[Title/Abstract] OR (multitrait[Title/Abstract] AND scaling[Title/Abstract] AND (analysis[Title/Abstract] OR analyses[Title/Abstract])) OR item discriminant[Title/Abstract] OR interscale correlation*[Title/Abstract] OR error[Title/Abstract] OR</p> |
|--|--|--------------------------------------------------------------------------------------------------------------------------------------------------------------------------------------------------------------------------------------------------------------------------------------------------------------------------------------------------------------------------------------------------------------------------------------------------------------------------------------------------------------------------------------------------------------------------------------------------------------------------------------------------------------------------------------------------------------------------------------------------------------------------------------------------------------------------------------------------------------------------------------------------------------------------------------------------------------------------------------------------------------------------------------------------------------------------------------------------------------------------------------------------------------------------------------------------------------------------------------------------------------------------------------------------------------------------------------------------------------------------------------------------------------------------------------------------------------------------------------------------------------------------------------------------------------------------------------------------------------------------------------------------------------------------------------------------------------------------------------------------------------------------------------------------------------------------------------------------------------------------------------------------------------------------------------------------------------------------------------------------------------------------------------------------------------------------------------------------------------------------------------------------------------------------------------------------------------------------------------------------------------------------------------------------------------------------------------------------------------------------------------------------------------------------------------------------------------------------------------------------------------------------------------------------------------------------------------------------------------------------------------------------------------------------------------------------------------------------------------------------------------------------------------------------------------------------------------------------------------------|

|  |  |                                                                                                                                                                                                                                                                                                                                                                                                                                                                                                                                                                                                                                                                                                                                                                                                                                                                                                                                                                                                                                                                                                                                                                                                                                                                                                                                                                                                                                                                                                                                                                                                                                                                                                                                                                                                                                                                                                                                                                                                                                                                                                                         |
|--|--|-------------------------------------------------------------------------------------------------------------------------------------------------------------------------------------------------------------------------------------------------------------------------------------------------------------------------------------------------------------------------------------------------------------------------------------------------------------------------------------------------------------------------------------------------------------------------------------------------------------------------------------------------------------------------------------------------------------------------------------------------------------------------------------------------------------------------------------------------------------------------------------------------------------------------------------------------------------------------------------------------------------------------------------------------------------------------------------------------------------------------------------------------------------------------------------------------------------------------------------------------------------------------------------------------------------------------------------------------------------------------------------------------------------------------------------------------------------------------------------------------------------------------------------------------------------------------------------------------------------------------------------------------------------------------------------------------------------------------------------------------------------------------------------------------------------------------------------------------------------------------------------------------------------------------------------------------------------------------------------------------------------------------------------------------------------------------------------------------------------------------|
|  |  | <p>errors[Title/Abstract] OR “individual variability”[Title/Abstract] OR (variability[Title/Abstract] AND (analysis[Title/Abstract] OR values[ Title/Abstract])) OR (uncertainty[Title/Abstract] AND (measurement[Title/Abstract] OR measuring[Title/Abstract])) OR “standard error of measurement”[ Title/Abstract] OR sensitiv*[Title/Abstract] OR responsive*[Title/Abstract] OR ((minimal[Title/Abstract] OR minimally[Title/Abstract] OR clinical[Title/Abstract] OR clinically[Title/Abstract]) AND (important[Title/Abstract] OR significant[Title/Abstract] OR detectable[Title/Abstract])) AND(change[Title/Abstract] OR difference[Title/Abstract])) OR (small*[Title/Abstract] AND (real[Title/Abstract] OR detectable[Title/Abstract]) AND (change[Title/Abstract] OR difference[Title/Abstract]) OR meaningful change [Title/Abstract] OR “ceiling effect”[Title/Abstract] OR “floor effect”[Title/Abstract] OR “Item response model”[Title/Abstract] OR IRT[Title/Abstract] OR Rasch[Title/Abstract] OR “Differential item functioning”[Title/Abstract] OR DIF[Title/Abstract] OR “computer adaptive testing”[Title/Abstract] OR “item bank”[Title/Abstract] OR “cross-cultural equivalence”[Title/Abstract])) NOT ((“address*”[Publication Type] OR “biography”[Publication Type] OR “case reports”[Publication Type] OR “comment”[Publication Type] OR “directory”[Publication Type] OR “editorial”[Publication Type] OR “festschrift”[ Publication Type] OR “interview”[Publication Type] OR “lectur*”[Publication Type] OR “legal case*”[Publication Type] OR “legislation”[Publication Type] OR “letter”[Publication Type] OR “news”[Publication Type] OR “newspaper article”[Publication Type] OR “patient education handout”[Publication Type] OR “popular work*”[Publication Type] OR “congress*” [Publication Type] OR “consensus development conference”[ Publication Type] OR “consensus development conference, nih”[Publication Type] OR “practice guideline”[ Publication Type]) NOT (“animals”[MeSH Terms] NOT “humans”[MeSH Terms])) AND (“mental health literacy scale*”) OR (MHLS))</p> |
|  |  | <p>Result in documents<br/>Final= 6<br/>Exclusion =14 (Different tool 13-RCT 1)</p>                                                                                                                                                                                                                                                                                                                                                                                                                                                                                                                                                                                                                                                                                                                                                                                                                                                                                                                                                                                                                                                                                                                                                                                                                                                                                                                                                                                                                                                                                                                                                                                                                                                                                                                                                                                                                                                                                                                                                                                                                                     |

\*\*Note. The initial PubMed search was conducted on June 3, 2023, and was limited to English.

**Table A2. Final Search Strategy**

|                               |
|-------------------------------|
| <b>1.2. Search for Embase</b> |
|                               |



|                                  |
|----------------------------------|
| <b>1.3. Search for PsychINFO</b> |
|                                  |
| <b>1.4. Search for CINAHL</b>    |
|                                  |
| <b>1.5. Search for ERIC</b>      |
|                                  |
| <b>1.6. Search for Medline</b>   |

## Supplementary 1C Data Charting Instruments

### 1C I. Descriptive Characteristics of The Included Studies

| #  | Study (Authors/year) | Study Design | Instrument Administration |          |         | Population |                  |                   |                   | Methodological Process              |                                                            | MHLS score | Reported MHLS modifications |
|----|----------------------|--------------|---------------------------|----------|---------|------------|------------------|-------------------|-------------------|-------------------------------------|------------------------------------------------------------|------------|-----------------------------|
|    |                      |              | Country                   | Language | Setting | N          | Age Mean (SD) yr | Gender (% female) | Selection process | Summary of adaptation process steps | Adaptation process / validation process reported guideline |            |                             |
| 1. |                      |              |                           |          |         |            |                  |                   |                   |                                     |                                                            |            |                             |
| 2. |                      |              |                           |          |         |            |                  |                   |                   |                                     |                                                            |            |                             |

*\*Sample size calculation reference provided*

### 1C II. Results of Studies on Measurement Properties

| Study (authors/date)                              | Country (language) in which the MHLS was evaluated | Structural validity |              |                 | Internal Consistency |              |                 | Cross-cultural validity/ measurement invariance |              |                 | Reliability |              |                 |
|---------------------------------------------------|----------------------------------------------------|---------------------|--------------|-----------------|----------------------|--------------|-----------------|-------------------------------------------------|--------------|-----------------|-------------|--------------|-----------------|
|                                                   |                                                    | n                   | Meth quality | Result (rating) | n                    | Meth quality | Result (rating) | n                                               | Meth quality | Result (rating) | n           | Meth quality | Result (rating) |
|                                                   |                                                    |                     |              |                 |                      |              |                 |                                                 |              |                 |             |              |                 |
|                                                   |                                                    |                     |              |                 |                      |              |                 |                                                 |              |                 |             |              |                 |
|                                                   |                                                    |                     |              |                 |                      |              |                 |                                                 |              |                 |             |              |                 |
| <i>Pooled or summary results (overall rating)</i> |                                                    |                     |              |                 |                      |              |                 |                                                 |              |                 |             |              |                 |

| <i>Study<br/>(authors/date)</i>                       | <i>Country<br/>(language) in<br/>which the<br/>MHLS was<br/>evaluated</i> | <i>Measurement Error</i> |                         |                            | <i>Criterion validity</i> |                         |                            | <i>Hypothesis testing</i> |                         |                            | <i>Responsiveness</i> |                         |                            |
|-------------------------------------------------------|---------------------------------------------------------------------------|--------------------------|-------------------------|----------------------------|---------------------------|-------------------------|----------------------------|---------------------------|-------------------------|----------------------------|-----------------------|-------------------------|----------------------------|
|                                                       |                                                                           | <i>n</i>                 | <i>Meth<br/>quality</i> | <i>Result<br/>(rating)</i> | <i>n</i>                  | <i>Meth<br/>quality</i> | <i>Result<br/>(rating)</i> | <i>n</i>                  | <i>Meth<br/>quality</i> | <i>Result<br/>(rating)</i> | <i>n</i>              | <i>Meth<br/>quality</i> | <i>Result<br/>(rating)</i> |
|                                                       |                                                                           |                          |                         |                            |                           |                         |                            |                           |                         |                            |                       |                         |                            |
|                                                       |                                                                           |                          |                         |                            |                           |                         |                            |                           |                         |                            |                       |                         |                            |
|                                                       |                                                                           |                          |                         |                            |                           |                         |                            |                           |                         |                            |                       |                         |                            |
| <i>Pooled or summary results<br/>(overall rating)</i> |                                                                           |                          |                         |                            |                           |                         |                            |                           |                         |                            |                       |                         |                            |

### 1C III. Summary of Findings Tables

| <i>Structural Validity</i> | <i>Summary or pooled results</i> | <i>Overall rating</i> | <i>Quality of evidence</i> |
|----------------------------|----------------------------------|-----------------------|----------------------------|
| PROM A                     |                                  |                       |                            |
| PROM B                     |                                  |                       |                            |
| PROM C                     |                                  |                       |                            |

| <i>Internal consistency</i> | <i>Summary or pooled results</i> | <i>Overall rating</i> | <i>Quality of evidence</i> |
|-----------------------------|----------------------------------|-----------------------|----------------------------|
| PROM A                      |                                  |                       |                            |
| PROM B                      |                                  |                       |                            |
| PROM C                      |                                  |                       |                            |

| <i>Cross-cultural<br/>validity\measurement<br/>invariance</i> | <i>Summary or pooled results</i> | <i>Overall rating</i> | <i>Quality of evidence</i> |
|---------------------------------------------------------------|----------------------------------|-----------------------|----------------------------|
| PROM A                                                        |                                  |                       |                            |
| PROM B                                                        |                                  |                       |                            |
| PROM C                                                        |                                  |                       |                            |

| <i>Reliability</i> | <i>Summary or pooled results</i> | <i>Overall rating</i> | <i>Quality of evidence</i> |
|--------------------|----------------------------------|-----------------------|----------------------------|
| PROM A             |                                  |                       |                            |
| PROM B             |                                  |                       |                            |
| PROM C             |                                  |                       |                            |

| <i>Measurement Error</i> | <i>Summary or pooled results</i> | <i>Overall rating</i> | <i>Quality of evidence</i> |
|--------------------------|----------------------------------|-----------------------|----------------------------|
| PROM A                   |                                  |                       |                            |
| PROM B                   |                                  |                       |                            |
| PROM C                   |                                  |                       |                            |

| <i>Hypothesis testing</i> | <i>Summary or pooled results</i> | <i>Overall rating</i> | <i>Quality of evidence</i> |
|---------------------------|----------------------------------|-----------------------|----------------------------|
| PROM A                    |                                  |                       |                            |
| PROM B                    |                                  |                       |                            |
| PROM C                    |                                  |                       |                            |

| <i>Responsiveness</i> | <i>Summary or pooled results</i> | <i>Overall rating</i> | <i>Quality of evidence</i> |
|-----------------------|----------------------------------|-----------------------|----------------------------|
| PROM A                |                                  |                       |                            |
| PROM B                |                                  |                       |                            |
| PROM C                |                                  |                       |                            |

## Supplementary 1D Hypotheses for construct validity and responsiveness

Specific MHLS hypotheses for ‘Hypothesis Testing for Construct Validity’ and ‘Responsiveness’

|                                           |                                                                                                                                                                                                                                                                                                                                                                                                                                                                                                                                                                                                                                                                                                                                                                                                                                                                                                                                                                                                                                                                                                                                                                                                                                                                                                                                                                                                                                                                                                                                                                                                                                                                                                                                                                                                                                                                                                               |
|-------------------------------------------|---------------------------------------------------------------------------------------------------------------------------------------------------------------------------------------------------------------------------------------------------------------------------------------------------------------------------------------------------------------------------------------------------------------------------------------------------------------------------------------------------------------------------------------------------------------------------------------------------------------------------------------------------------------------------------------------------------------------------------------------------------------------------------------------------------------------------------------------------------------------------------------------------------------------------------------------------------------------------------------------------------------------------------------------------------------------------------------------------------------------------------------------------------------------------------------------------------------------------------------------------------------------------------------------------------------------------------------------------------------------------------------------------------------------------------------------------------------------------------------------------------------------------------------------------------------------------------------------------------------------------------------------------------------------------------------------------------------------------------------------------------------------------------------------------------------------------------------------------------------------------------------------------------------|
| Hypothesis Testing for Construct Validity | <p>Hypothesised <i>a priori</i> that we would observe:</p> <p><b><i>Comparison with other outcome measurement instruments (convergent validity)</i></b></p> <ol style="list-style-type: none"> <li>1. In all populations, strong correlations <math>\geq 0.5</math> will be observed between MHLS and comparator instruments (see Table 2) measuring similar constructs [e.g. Mental health literacy questionnaire-short version for adults (MHLq-SVa)]</li> <li>2. In all populations, medium correlations (<math>\geq 0.30</math> and <math>&lt; 0.50</math>) will be observed between MHLS and instruments (see Table 2) measuring <i>related but dissimilar</i> constructs [e.g. Attitudes Towards Depression (ATD), The Stigmatizing Attitudes-Believability (SAB)]</li> <li>3. In all populations, ,weak correlations (<math>&lt; 0.3</math>) will be observed between MHLS and instruments (see Table 2) measuring <i>a separate</i> construct (instruments that do not measure MHL) [e.g. The 12-item General Health Questionnaire (GHQ-12), My lifestyle questionnaire (MLQ)].</li> </ol> <p><b><i>Comparison between subgroups (Divergent validity)</i></b></p> <p>MHLS scores should be able to distinguish between the following groups, with statistically significant differences between the groups:</p> <ul style="list-style-type: none"> <li>• <b>Alternative Hypothesis 1:</b> younger vs. older age groups, with older groups having higher MHL.</li> <li>• <b>Alternative Hypothesis 2:</b> males vs. females, with females having higher MHL.</li> <li>• <b>Alternative Hypothesis 3:</b> those who have direct experience with mental disorders vs. those who do not, with those having direct experience with mental disorders having higher MHL.</li> <li>• <b>Alternative Hypothesis 4:</b> those who have indirect experience with mental disorders (family or friends)</li> </ul> |
|-------------------------------------------|---------------------------------------------------------------------------------------------------------------------------------------------------------------------------------------------------------------------------------------------------------------------------------------------------------------------------------------------------------------------------------------------------------------------------------------------------------------------------------------------------------------------------------------------------------------------------------------------------------------------------------------------------------------------------------------------------------------------------------------------------------------------------------------------------------------------------------------------------------------------------------------------------------------------------------------------------------------------------------------------------------------------------------------------------------------------------------------------------------------------------------------------------------------------------------------------------------------------------------------------------------------------------------------------------------------------------------------------------------------------------------------------------------------------------------------------------------------------------------------------------------------------------------------------------------------------------------------------------------------------------------------------------------------------------------------------------------------------------------------------------------------------------------------------------------------------------------------------------------------------------------------------------------------|

|                |                                                                                                                                                                                                                                                                                                                                                                                                                                                                   |
|----------------|-------------------------------------------------------------------------------------------------------------------------------------------------------------------------------------------------------------------------------------------------------------------------------------------------------------------------------------------------------------------------------------------------------------------------------------------------------------------|
|                | <p>vs. those who do not, with those having indirect experience with mental disorders having higher MHL.</p> <ul style="list-style-type: none"> <li>• <b>Alternative Hypothesis 5:</b> Those with low SES vs. high SES. With those with high SES having higher MHL.</li> <li>• <b>Alternative Hypothesis 6:</b> Those with low education levels vs. high education levels, with those with higher education having higher MHL.</li> </ul>                          |
| Responsiveness | <p>Hypothesized <i>a priori</i> that we would observe:</p> <p><b>Before and After Intervention:</b></p> <p>A. <b>Null hypothesis:</b> In response to an educational intervention, we expect no difference in MHLS scores in the intervention and control groups.</p> <p>B. <b>Alternative hypothesis:</b> In response to an educational intervention, we expect a statistically significant difference in MHLS scores in the intervention and control groups.</p> |

1. O'Connor M, Casey L. The Mental Health Literacy Scale (MHLS): A new scale-based measure of mental health literacy. *Psychiatry Res.* 2015 Sep 30;229(1–2):511–6.
2. Terwee CB, Jansma EP, Riphagen II, de Vet HCW. Development of a methodological PubMed search filter for finding studies on measurement properties of measurement instruments. *Qual Life Res.* 2009 Oct 1;18(8):1115–23.
3. Stephenson M, Riitano D, Wilson S, Leonardi-Bee J, Mabire C, Cooper K, et al. Chapter 12: Systematic reviews of measurement properties. In: *JBIManual for Evidence Synthesis* [Internet]. JBI; 2020 [cited 2023 Sep 10]. Available from: <https://jbi-global-wiki.refined.site/space/MANUAL/4686202/Chapter+12%3A+Systematic+reviews+of+measurement+properties>
